# Supplementary material for: Alkynyl trifluoromethyl selenide synthesis via oxidative trifluoromethylselenolation of terminal alkynes
Source: Royal Society of Chemistry journal article supplement (doi:10.1039/c5qo00045a), 2015-01-01

## Supporting Information *for*

# Alkynyl Trifluoromethyl Selenides Synthesis *via* Oxidative Trifluoromethylselenolation of Terminal Alkynes

Yuguang Wang, Yi You,\* and Zhiqiang Weng\*

*Department of Chemistry, Fuzhou University, Fuzhou 350108, China*

## Table of Contents

|                                                                                                                                          |    |
|------------------------------------------------------------------------------------------------------------------------------------------|----|
| General Information.....                                                                                                                 | 2  |
| General procedure for trifluoromethylselenolation of terminal alkynes.....                                                               | 2  |
| Data for compounds <b>3</b> .....                                                                                                        | 3  |
| Procedure for gram scale reaction for synthesis of<br>( <i>p</i> -tolylethynyl)(trifluoromethyl)selane ( <b>3b</b> ) .....               | 12 |
| Procedure for the trifluoromethylselenolation of <b>1</b> with 4-ethynyltoluene ( <b>2b</b> ) in the<br>presence of 1.0 equiv TEMPO..... | 12 |
| Experiments for Mechanistic Investigations.....                                                                                          | 13 |
| Copies of <sup>1</sup> H NMR, <sup>19</sup> F NMR and <sup>13</sup> C NMR Spectra for Compounds <b>3a–v</b> .....                        | 18 |

**General Information:**  $^1\text{H}$  NMR,  $^{19}\text{F}$  NMR and  $^{13}\text{C}$  NMR spectra were recorded using a 400 spectrometer.  $^1\text{H}$  NMR and  $^{13}\text{C}$  NMR chemical shifts were reported in parts per million (ppm) downfield from tetramethylsilane and  $^{19}\text{F}$  NMR chemical shifts were determined relative to  $\text{CFCl}_3$  as the external standard and low field is positive. Coupling constants ( $J$ ) are reported in Hertz (Hz). The residual solvent peak was used as an internal reference:  $^1\text{H}$  NMR (chloroform  $\delta$  7.26) and  $^{13}\text{C}$  NMR (chloroform  $\delta$  77.0). The following abbreviations were used to explain the multiplicities: s = singlet, d = doublet, t = triplet, q = quartet, m = multiplet, br = broad. HRMS were obtained on GCT-TOF.  $[(\text{bpy})\text{Cu}(\text{SeCF}_3)_2]$  was prepared according to the published procedures.<sup>1</sup> Other reagents were received from commercial sources. Solvents were freshly dried and degassed according to the published procedures<sup>2</sup> prior to use. Column chromatography purifications were performed by flash chromatography using silica gel 60.

**General procedure for trifluoromethylselenolation of terminal alkynes with  $[(\text{bpy})\text{Cu}(\text{SeCF}_3)_2]$ :** Terminal alkynes **2** (0.30 mmol),  $[(\text{bpy})\text{Cu}(\text{SeCF}_3)_2]$  **1** (132 mg, 0.18 mmol), DMP (255 mg, 0.60 mmol, 2.0 equiv), KF (52 mg, 0.90 mmol, 3.0 equiv), and DMF (2.5 mL) were added to a reaction tube equipped with a stir bar. The mixture was stirred at 25 °C for 16 hours. The reaction mixture was filtered through a pad of celite. The filtrate was added water (30 mL) at 0 °C. The resulting mixture was extracted with  $\text{Et}_2\text{O}$  (3×15 mL), and the combined organic layers was washed with water, and then dried over  $\text{MgSO}_4$ . The solvent was removed by rotary evaporation in an ice bath and the resulting product was purified by column chromatography on silica gel with pentane/ $\text{Et}_2\text{O}$ .

- 
1. C. Chen, L. Ouyang, Q. Lin, Y. Liu, C. Hou, Y. Yuan, Z. Weng, *Chem.-Eur. J.* **2014**, *20*, 657-661.
  2. W. L. F. Armerego, C. L. L. Chai, *Purification of Laboratory Chemicals*, 6th ed., Elsevier, Amsterdam, **2009**.

### Data for compounds 3

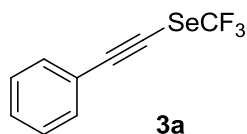

#### (Phenylethynyl)(trifluoromethyl)selane (**3a**)

Obtained as a pale yellow oil in 74% yield (55 mg).  $R_f$  (*n*-pentane) = 0.76.  $^1\text{H}$  NMR (400 MHz,  $\text{CDCl}_3$ )  $\delta$  7.53 – 7.51 (m, 2H), 7.44 – 7.33 (m, 3H).  $^{19}\text{F}$  NMR (376 MHz,  $\text{CDCl}_3$ )  $\delta$  -36.2 (s, 3F).  $^{13}\text{C}$  NMR (101 MHz,  $\text{CDCl}_3$ )  $\delta$  132.0 (s), 129.5 (s), 128.4 (s), 120.7 (q,  $J = 336.3$  Hz), 122.0 (s), 107.2 (d,  $J = 1.1$  Hz), 61.8 (q,  $J = 3.1$  Hz). IR (KBr):  $\nu$  2928, 2852, 2169, 1489, 1443, 1154, 1098, 755, 689, 532  $\text{cm}^{-1}$ . GC-MS  $m/z$  249 ( $\text{M}^+$ ). HRMS (EI)  $m/z$ : Calcd. for  $\text{C}_9\text{H}_5\text{F}_3^{74}\text{Se}$ : 243.9568; Found: 243.9566.

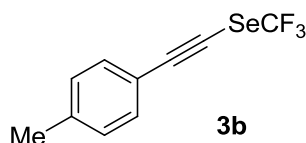

#### (*p*-Tolyethynyl)(trifluoromethyl)selane (**3b**)

Obtained as a yellow solid in 87% yield (69 mg). M.p: 40–41 °C.  $R_f$  (*n*-pentane) = 0.72.  $^1\text{H}$  NMR (400 MHz,  $\text{CDCl}_3$ )  $\delta$  7.42 (d,  $J = 8.1$  Hz, 2H), 7.18 (d,  $J = 8.1$  Hz, 2H), 2.40 (s, 3H).  $^{19}\text{F}$  NMR (376 MHz,  $\text{CDCl}_3$ )  $\delta$  -36.3 (s, 3F).  $^{13}\text{C}$  NMR (101 MHz,  $\text{CDCl}_3$ )  $\delta$  140.0 (s), 132.1 (s), 129.2 (s), 120.7 (q,  $J = 336.3$  Hz), 119.0 (s), 107.4 (d,  $J = 1.3$  Hz), 60.9 (q,  $J = 3.1$  Hz), 21.6 (s). IR (KBr):  $\nu$  2951, 1683, 1558, 1508, 1154, 1072, 1047, 917, 816, 741  $\text{cm}^{-1}$ . GC-MS  $m/z$  263 ( $\text{M}^+$ ). HRMS (EI)  $m/z$ : Calcd. for  $\text{C}_{10}\text{H}_7\text{F}_3^{74}\text{Se}$ : 257.9725; Found: 257.9731.

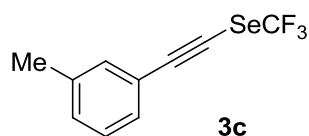

#### (*m*-Tolyethynyl)(trifluoromethyl)selane (**3c**)

Obtained as a yellow oil in 81% yield (64 mg).  $R_f$  (*n*-pentane) = 0.71.  $^1\text{H}$  NMR (400 MHz,  $\text{CDCl}_3$ )  $\delta$  7.36 – 7.20 (m, 4H), 2.37 (s, 3H).  $^{19}\text{F}$  NMR (376 MHz,  $\text{CDCl}_3$ )  $\delta$  -36.2 (s, 3F).  $^{13}\text{C}$  NMR (101 MHz,  $\text{CDCl}_3$ )  $\delta$  138.2 (s), 132.6 (s), 130.4 (s), 129.1 (s),

128.3 (s), 121.8 (s), 120.5 (q,  $J = 336.3$  Hz), 107.4 (d,  $J = 1.1$  Hz), 61.3 (q,  $J = 3.1$  Hz), 21.2 (s). IR (KBr):  $\nu$  2925, 2855, 1600, 1483, 1155, 1096, 784, 741, 689, 442  $\text{cm}^{-1}$ . GC-MS  $m/z$  263 ( $\text{M}^+$ ). HRMS (EI)  $m/z$ : Calcd. for  $\text{C}_{10}\text{H}_7\text{F}_3^{74}\text{Se}$ : 257.9725; Found: 257.9728.

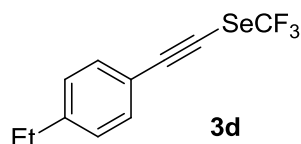

**((4-Ethylphenyl)ethynyl)(trifluoromethyl)selane (3d)**

Obtained as a yellow solid in 87% yield (72 mg). M.p: 31–32 °C.  $R_f$  (*n*-pentane) = 0.64.  $^1\text{H}$  NMR (400 MHz,  $\text{CDCl}_3$ )  $\delta$  7.45 (d,  $J = 8.1$  Hz, 2H), 7.21 (d,  $J = 8.1$  Hz, 2H), 2.70 (q,  $J = 7.6$  Hz, 2H), 1.27 (t,  $J = 7.6$  Hz, 3H).  $^{19}\text{F}$  NMR (376 MHz,  $\text{CDCl}_3$ )  $\delta$  -36.4 (s, 3F).  $^{13}\text{C}$  NMR (101 MHz,  $\text{CDCl}_3$ )  $\delta$  146.2 (s), 132.2 (s), 128.0 (s), 120.7 (q,  $J = 336.4$  Hz), 119.2 (s), 107.5 (d,  $J = 0.7$  Hz), 60.9 (q,  $J = 3.1$  Hz), 28.9 (s), 15.3 (s). IR (KBr):  $\nu$  3031, 2936, 2166, 1508, 1154, 1093, 1019, 932, 741  $\text{cm}^{-1}$ . GC-MS  $m/z$  277 ( $\text{M}^+$ ). HRMS (EI)  $m/z$ : Calcd. for  $\text{C}_{11}\text{H}_9\text{F}_3^{74}\text{Se}$ : 271.9881; Found: 271.9886.

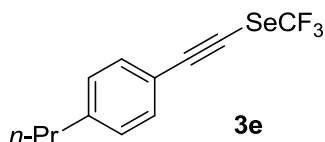

**((4-Propylphenyl)ethynyl)(trifluoromethyl)selane (3e)**

Obtained as a white solid in 84% yield (73 mg). M.p: 31–32 °C.  $R_f$  (*n*-pentane) = 0.70.  $^1\text{H}$  NMR (400 MHz,  $\text{CDCl}_3$ )  $\delta$  7.44 (d,  $J = 8.2$  Hz, 2H), 7.19 (d,  $J = 8.2$  Hz, 2H), 2.68 – 2.57 (m, 2H), 1.73 – 1.61 (m, 2H), 0.97 (t,  $J = 7.3$  Hz, 3H).  $^{19}\text{F}$  NMR (376 MHz,  $\text{CDCl}_3$ )  $\delta$  -36.4 (s, 3F).  $^{13}\text{C}$  NMR (101 MHz,  $\text{CDCl}_3$ )  $\delta$  144.7 (s), 132.1 (s), 128.6 (s), 120.7 (q,  $J = 336.4$  Hz), 119.2 (s), 107.5 (d,  $J = 1.3$  Hz), 60.9 (q,  $J = 3.1$  Hz), 38.0 (s), 24.3 (s), 13.7 (s). IR (KBr):  $\nu$  2974, 1686, 1561, 1508, 1459, 1157, 1094, 1051, 741  $\text{cm}^{-1}$ . GC-MS  $m/z$  291 ( $\text{M}^+$ ). HRMS (EI)  $m/z$ : Calcd. for  $\text{C}_{12}\text{H}_{11}\text{F}_3^{74}\text{Se}$ : 286.0038; Found: 286.0031.

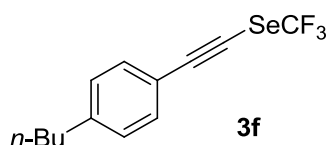

**((4-Butylphenyl)ethynyl)(trifluoromethyl)selane (3f)**

Obtained as a yellow oil in 81% yield (74 mg).  $R_f$  (*n*-pentane) = 0.69.  $^1\text{H}$  NMR (400 MHz,  $\text{CDCl}_3$ )  $\delta$  7.43 (d,  $J = 8.0$  Hz, 2H), 7.19 (d,  $J = 8.0$  Hz, 2H), 2.70 – 2.57 (m, 2H), 1.68 – 1.53 (m, 2H), 1.45 – 1.30 (m, 2H), 0.95 (t,  $J = 7.3$  Hz, 3H).  $^{19}\text{F}$  NMR (376 MHz,  $\text{CDCl}_3$ )  $\delta$  -36.4 (s, 3F).  $^{13}\text{C}$  NMR (101 MHz,  $\text{CDCl}_3$ )  $\delta$  145.0 (s), 132.1 (s), 128.6 (s), 120.7 (q,  $J = 336.0$  Hz), 119.1 (s), 107.4 (d,  $J = 1.3$  Hz), 60.9 (q,  $J = 3.1$  Hz), 35.7 (s), 33.3 (s), 22.3 (s), 13.9 (s). IR (KBr):  $\nu$  2959, 2932, 2860, 2166, 1507, 1156, 1094, 828, 741, 537  $\text{cm}^{-1}$ . GC-MS  $m/z$  305 ( $\text{M}^+$ ). HRMS (EI)  $m/z$ : Calcd. for  $\text{C}_{13}\text{H}_{13}\text{F}_3$   $^{74}\text{Se}$ : 300.0194; Found: 300.0200.

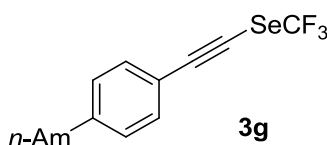

**((4-Pentylphenyl)ethynyl)(trifluoromethyl)selane (3g)**

Obtained as a yellow oil in 78% yield (75 mg).  $R_f$  (*n*-pentane) = 0.80.  $^1\text{H}$  NMR (400 MHz,  $\text{CDCl}_3$ )  $\delta$  7.44 (d,  $J = 8.3$  Hz, 2H), 7.19 (d,  $J = 8.3$  Hz, 2H), 2.71 – 2.52 (m, 2H), 1.74 – 1.50 (m, 2H), 1.40 – 1.30 (m, 4H), 0.92 (t,  $J = 6.9$  Hz, 3H).  $^{19}\text{F}$  NMR (376 MHz,  $\text{CDCl}_3$ )  $\delta$  -36.4 (s, 3F).  $^{13}\text{C}$  NMR (101 MHz,  $\text{CDCl}_3$ )  $\delta$  145.0 (s), 132.1 (s), 128.6 (s), 120.7 (q,  $J = 336.4$  Hz), 119.2 (s), 107.5 (d,  $J = 1.1$  Hz), 60.9 (q,  $J = 3.1$  Hz), 35.9 (s), 31.4 (s), 30.9 (s), 22.5 (s), 14.0 (s). IR (KBr):  $\nu$  2958, 2935, 2859, 2161, 1508, 1151, 1104, 831, 740, 541  $\text{cm}^{-1}$ . GC-MS  $m/z$  320 ( $\text{M}^+$ ). HRMS (EI)  $m/z$ : Calcd. for  $\text{C}_{14}\text{H}_{15}\text{F}_3$   $^{74}\text{Se}$ : 314.0351; Found: 314.0356.

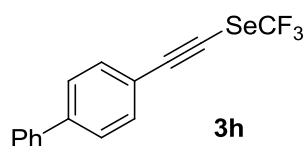

**([1,1'-Biphenyl]-4-ylethynyl)(trifluoromethyl)selane (3h)**

Obtained as a yellow solid in 74% yield (74 mg). M.p: 53–54 °C.  $R_f$  (*n*-pentane) =

0.79.  $^1\text{H}$  NMR (400 MHz,  $\text{CDCl}_3$ )  $\delta$  7.64 – 7.50 (m, 6H), 7.44 (t,  $J = 7.4$  Hz, 2H), 7.36 (t,  $J = 7.4$  Hz, 1H).  $^{19}\text{F}$  NMR (376 MHz,  $\text{CDCl}_3$ )  $\delta$  -36.1 (s, 3F).  $^{13}\text{C}$  NMR (101 MHz,  $\text{CDCl}_3$ )  $\delta$  142.3 (s), 140.1 (s), 132.6 (s), 129.0 (s), 128.0 (s), 127.1 (s), 120.9 (s), 120.8 (q,  $J = 336.5$  Hz), 107.2 (d,  $J = 1.1$  Hz), 62.5 (q,  $J = 3.1$  Hz). IR (KBr):  $\nu$  2951, 1558, 1404, 1147, 1108, 1082, 841, 764, 741, 693  $\text{cm}^{-1}$ . GC-MS  $m/z$  326 ( $\text{M}^+\text{+H}$ ). HRMS (EI)  $m/z$ : Calcd. for  $\text{C}_{15}\text{H}_9\text{F}_3$   $^{74}\text{Se}$ : 319.9881; Found: 319.9882.

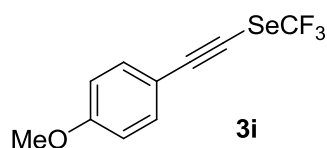

**((4-Methoxyphenyl)ethynyl)(trifluoromethyl)selane (3i)**

Obtained as a yellow oil in 81% yield (68 mg).  $R_f$  ( $n$ -pentane) = 0.49.  $^1\text{H}$  NMR (400 MHz,  $\text{CDCl}_3$ )  $\delta$  7.47 (d,  $J = 8.9$  Hz, 2H), 6.89 (d,  $J = 8.9$  Hz, 2H), 3.85 (s, 3H).  $^{19}\text{F}$  NMR (376 MHz,  $\text{CDCl}_3$ )  $\delta$  -36.5 (s, 3F).  $^{13}\text{C}$  NMR (101 MHz,  $\text{CDCl}_3$ )  $\delta$  160.7 (s), 134.1 (s), 120.7 (q,  $J = 336.5$  Hz), 114.1 (s), 107.3 (d,  $J = 1.2$  Hz), 60.2 (q,  $J = 3.2$  Hz), 55.3 (s). IR (KBr):  $\nu$  2952, 1605, 1509, 1294, 1252, 1152, 1106, 832, 741, 669  $\text{cm}^{-1}$ . GC-MS  $m/z$  279 ( $\text{M}^+$ ). HRMS (EI)  $m/z$ : Calcd. for  $\text{C}_{10}\text{H}_7\text{OF}_3$   $^{74}\text{Se}$ : 273.9674; Found: 273.9670.

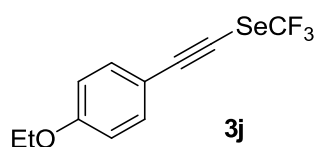

**((4-Ethoxyphenyl)ethynyl)(trifluoromethyl)selane (3j)**

Obtained as a white solid in 73% yield (64 mg). M.p: 61–62 °C.  $R_f$  ( $n$ -pentane) = 0.46.  $^1\text{H}$  NMR (400 MHz,  $\text{CDCl}_3$ )  $\delta$  7.46 (d,  $J = 8.6$  Hz, 2H), 6.88 (d,  $J = 8.6$  Hz, 2H), 4.07 (q,  $J = 7.0$  Hz, 2H), 1.45 (t,  $J = 7.0$  Hz, 3H).  $^{19}\text{F}$  NMR (376 MHz,  $\text{CDCl}_3$ )  $\delta$  -36.6 (s, 3F).  $^{13}\text{C}$  NMR (101 MHz,  $\text{CDCl}_3$ )  $\delta$  160.1 (s), 134.1 (s), 120.7 (q,  $J = 336.5$  Hz), 114.5 (s), 113.8 (s), 107.4 (d,  $J = 0.6$  Hz), 63.6 (s), 60.1 (q,  $J = 3.1$  Hz), 14.7 (s). IR (KBr):  $\nu$  2990, 2935, 2156, 1602, 1508, 1475, 1258, 1149, 1116, 840  $\text{cm}^{-1}$ . GC-MS  $m/z$  293 ( $\text{M}^+$ ). HRMS (EI)  $m/z$ : Calcd. for  $\text{C}_{11}\text{H}_9\text{OF}_3$   $^{74}\text{Se}$ : 287.9830; Found:

287.9834.

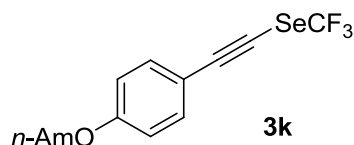

**((4-(Pentyloxy)phenyl)ethynyl)(trifluoromethyl)selane (3k)**

Obtained as a yellow solid in 79% yield (79 mg). M.p: 37–38 °C.  $R_f$  (*n*-pentane) = 0.64.  $^1\text{H}$  NMR (400 MHz,  $\text{CDCl}_3$ )  $\delta$  7.46 (d,  $J = 8.9$  Hz, 2H), 6.88 (d,  $J = 8.9$  Hz, 2H), 3.99 (t,  $J = 6.6$  Hz, 2H), 1.90 – 1.72 (m, 2H), 1.54 – 1.34 (m, 4H), 0.96 (t,  $J = 7.1$  Hz, 3H).  $^{19}\text{F}$  NMR (376 MHz,  $\text{CDCl}_3$ )  $\delta$  -36.6 (s, 3F).  $^{13}\text{C}$  NMR (101 MHz,  $\text{CDCl}_3$ )  $\delta$  160.3 (s), 134.1 (s), 120.7 (q,  $J = 336.5$  Hz), 114.6 (s), 113.8 (s), 107.5 (d,  $J = 1.2$  Hz), 68.2 (s), 60.0 (q,  $J = 3.2$  Hz), 28.8 (s), 28.2 (s), 22.4 (s), 14.0 (s). IR (KBr):  $\nu$  2936, 2862, 2156, 1602, 1508, 1259, 1151, 1125, 1108, 837  $\text{cm}^{-1}$ . GC-MS  $m/z$  335 ( $\text{M}^+$ ). HRMS (EI)  $m/z$ : Calcd. for  $\text{C}_{14}\text{H}_{15}\text{OF}_3$  $^{74}\text{Se}$ : 330.0300; Found: 330.0302.

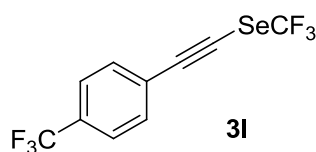

**(Trifluoromethyl)((4-(trifluoromethyl)phenyl)ethynyl)selane (3l)**

Obtained as a yellow oil in 68% yield (67 mg).  $R_f$  (*n*-pentane) = 0.69.  $^1\text{H}$  NMR (400 MHz,  $\text{CDCl}_3$ )  $\delta$  7.63 – 7.52 (m, 4H).  $^{19}\text{F}$  NMR (376 MHz,  $\text{CDCl}_3$ )  $\delta$  -35.8 (s, 3F), -63.1 (s, 3F).  $^{13}\text{C}$  NMR (101 MHz,  $\text{CDCl}_3$ )  $\delta$  132.0 (s), 131.0 (q,  $J = 32.9$  Hz), 125.4 (q,  $J = 3.8$  Hz), 125.1 (s), 122.4 (s), 120.6 (q,  $J = 336.2$  Hz), 105.7 (s), 65.0 (q,  $J = 3.0$  Hz). IR (KBr):  $\nu$  2946, 1615, 1324, 1163, 1091, 1067, 1017, 742, 642, 597  $\text{cm}^{-1}$ . GC-MS  $m/z$  317 ( $\text{M}^+$ ). HRMS (EI)  $m/z$ : Calcd. for  $\text{C}_{10}\text{H}_4\text{F}_6$  $^{74}\text{Se}$ : 311.9442; Found: 311.9439.

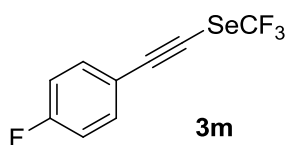

**((4-Fluorophenyl)ethynyl)(trifluoromethyl)selane (3m)**

Obtained as a yellow oil in 71% yield (59 mg).  $R_f$  (*n*-pentane) = 0.75.  $^1\text{H}$  NMR (400 MHz,  $\text{CDCl}_3$ )  $\delta$  7.51 (dd,  $J = 8.2, 5.8$  Hz, 2H), 7.07 (t,  $J = 8.6$  Hz, 2H).  $^{19}\text{F}$  NMR (376 MHz,  $\text{CDCl}_3$ )  $\delta$  -36.2 (s, 3F), -108.4 – -108.5 (m, 1F).  $^{13}\text{C}$  NMR (101 MHz,  $\text{CDCl}_3$ )  $\delta$  163.2 (d,  $J = 252.5$  Hz), 134.3 (d,  $J = 8.6$  Hz), 120.7 (q,  $J = 336.2$  Hz), 118.1 (d,  $J = 3.6$  Hz), 115.8 (d,  $J = 22.2$  Hz), 106.1 (d,  $J = 1.0$  Hz), 61.7 (q,  $J = 3.2$  Hz). IR (KBr):  $\nu$  2929, 2854, 2170, 1601, 1507, 1237, 1157, 1090, 836, 771  $\text{cm}^{-1}$ . GC-MS  $m/z$  267 ( $\text{M}^+$ ). HRMS (EI)  $m/z$ : Calcd. for  $\text{C}_9\text{H}_4\text{F}_4^{74}\text{Se}$ : 261.9474; Found: 261.9472.

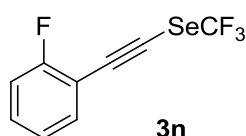

**((2-Fluorophenyl)ethynyl)(trifluoromethyl)selane (3n)**

Obtained as a pale yellow oil in 77% yield (62 mg).  $R_f$  (*n*-pentane) = 0.60.  $^1\text{H}$  NMR (400 MHz,  $\text{CDCl}_3$ )  $\delta$  7.50 (t,  $J = 6.7$  Hz, 1H), 7.44- 7.34 (m, 1H), 7.21 – 7.08 (m, 2H).  $^{19}\text{F}$  NMR (376 MHz,  $\text{CDCl}_3$ )  $\delta$  -35.9 (s, 3F), -108.8 – -108.9 (m, 1F).  $^{13}\text{C}$  NMR (101 MHz,  $\text{CDCl}_3$ )  $\delta$  163.0 (d,  $J = 254.5$  Hz), 133.8 (s), 131.4 (d,  $J = 8.1$  Hz), 124.1 (d,  $J = 3.8$  Hz), 120.7 (q,  $J = 336.4$  Hz), 115.7 (d,  $J = 21.2$  Hz), 110.7 (d,  $J = 15.6$  Hz), 100.5 (s), 67.2 (q,  $J = 3.2$  Hz). IR (KBr):  $\nu$  2927, 2853, 2174, 1491, 1247, 1160, 1098, 779, 756, 742  $\text{cm}^{-1}$ . GC-MS  $m/z$  267 ( $\text{M}^+$ ). HRMS (EI)  $m/z$ : Calcd. for  $\text{C}_9\text{H}_4\text{F}_4^{74}\text{Se}$ : 261.9474; Found: 261.9478.

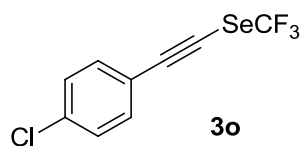

**((4-Chlorophenyl)ethynyl)(trifluoromethyl)selane (3o)**

Obtained as a pale yellow solid in 82% yield (70 mg). M.p: 30–31 °C.  $R_f$  (*n*-pentane) = 0.80.  $^1\text{H}$  NMR (400 MHz,  $\text{CDCl}_3$ )  $\delta$  7.44 (d,  $J = 8.3$  Hz, 2H), 7.35 (d,  $J = 8.3$  Hz, 2H).  $^{19}\text{F}$  NMR (376 MHz,  $\text{CDCl}_3$ )  $\delta$  -35.9 (s, 3F).  $^{13}\text{C}$  NMR (101 MHz,  $\text{CDCl}_3$ )  $\delta$  135.7 (s), 133.2 (s), 128.9 (s), 122.3 (q,  $J = 336.4$  Hz), 120.5 (s), 106.0 (d,  $J = 1.1$  Hz), 63.1 (q,  $J = 3.1$  Hz). IR (KBr):  $\nu$  2952, 2913, 1686, 1655, 1560, 1509, 1155, 1070,



943, 828  $\text{cm}^{-1}$ . GC-MS  $m/z$  283 ( $\text{M}^+$ ). HRMS (EI)  $m/z$ : Calcd. for  $\text{C}_9\text{H}_4\text{F}_3\text{Cl}^{74}\text{Se}$ : 277.9178; Found: 277.9177.

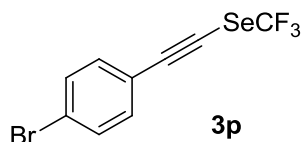

**((4-Bromophenyl)ethynyl)(trifluoromethyl)selane (3p)**

Obtained as a pale yellow solid in 76% yield (75 mg). M.p: 38–39 °C.  $R_f$  (*n*-pentane) = 0.80.  $^1\text{H}$  NMR (400 MHz,  $\text{CDCl}_3$ )  $\delta$  7.51 (d,  $J = 8.1$  Hz, 2H), 7.37 (d,  $J = 8.1$  Hz, 2H).  $^{19}\text{F}$  NMR (376 MHz,  $\text{CDCl}_3$ )  $\delta$  -35.9 (s, 3F).  $^{13}\text{C}$  NMR (101 MHz,  $\text{CDCl}_3$ )  $\delta$  133.4 (s), 131.8 (s), 124.0 (s), 120.9 (s), 120.6 (q,  $J = 336.4$  Hz), 106.1 (d,  $J = 1.1$  Hz), 63.3 (q,  $J = 3.1$  Hz). IR (KBr):  $\nu$  2951, 1584, 1486, 1156, 1099, 1085, 1011, 823, 741, 650  $\text{cm}^{-1}$ . GC-MS  $m/z$  327 ( $\text{M}^+$ ). HRMS (EI)  $m/z$ : Calcd. for  $\text{C}_9\text{H}_4\text{F}_3^{74}\text{SeBr}$ : 321.8673; Found: 321.8665.

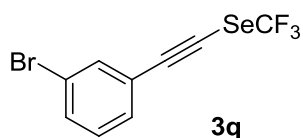

**((3-Bromophenyl)ethynyl)(trifluoromethyl)selane (3q)**

Obtained as a pale yellow oil in 75% yield (74 mg).  $R_f$  (*n*-pentane) = 0.68.  $^1\text{H}$  NMR (400 MHz,  $\text{CDCl}_3$ )  $\delta$  7.66 (s, 1H), 7.53 (d,  $J = 7.9$  Hz, 1H), 7.44 (d,  $J = 7.9$  Hz, 1H), 7.24 (t,  $J = 7.9$  Hz, 1H).  $^{19}\text{F}$  NMR (376 MHz,  $\text{CDCl}_3$ )  $\delta$  -35.8 (s, 3F).  $^{13}\text{C}$  NMR (101 MHz,  $\text{CDCl}_3$ )  $\delta$  134.6 (s), 132.6 (s), 130.6 (s), 129.9 (s), 123.9 (s), 122.3 (s), 120.6 (q,  $J = 336.5$  Hz), 105.5 (d,  $J = 1.1$  Hz), 63.7 (q,  $J = 3.1$  Hz). IR (KBr):  $\nu$  1585, 1561, 1471, 1157, 1095, 867, 782, 742, 679, 437  $\text{cm}^{-1}$ . GC-MS  $m/z$  327 ( $\text{M}^+$ ). HRMS (EI)  $m/z$ : Calcd. for  $\text{C}_9\text{H}_4\text{F}_3^{74}\text{SeBr}$ : 321.8673; Found: 321.8669.

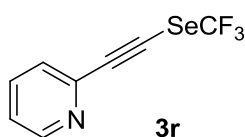

**2-((Trifluoromethylselanyl)ethynyl)pyridine (3r)**

Obtained as a sepia oil in 73% yield (55 mg).  $R_f$  (*n*-pentane/diethyl ether 1:1) = 0.52.  $^1\text{H}$  NMR (400 MHz,  $\text{CDCl}_3$ )  $\delta$  8.61 (d,  $J = 4.7$  Hz, 1H), 7.70 (t,  $J = 7.7$  Hz, 1H), 7.48 (d,  $J = 7.8$  Hz, 1H), 7.29 (t,  $J = 6.2$  Hz, 1H).  $^{19}\text{F}$  NMR (376 MHz,  $\text{CDCl}_3$ )  $\delta$  -35.3 (s, 3F).  $^{13}\text{C}$  NMR (101 MHz,  $\text{CDCl}_3$ )  $\delta$  150.2 (s), 142.1 (s), 136.3 (s), 127.3 (s), 123.7 (s), 120.6 (q,  $J = 336.5$  Hz), 106.4 (d,  $J = 1.0$  Hz), 63.3 (q,  $J = 3.0$  Hz). IR (KBr):  $\nu$  2952, 2913, 1581, 1460, 1427, 1151, 1095, 990, 777, 740  $\text{cm}^{-1}$ . GC-MS  $m/z$  250 ( $\text{M}^+$ ). HRMS (EI)  $m/z$ : Calcd. for  $\text{C}_8\text{H}_4\text{N}$   $\text{F}_3^{74}\text{Se}$ : 244.9521; Found: 244.9522.

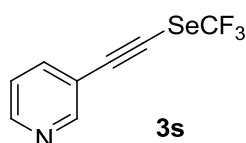

### 3-((Trifluoromethylselanyl)ethynyl)pyridine (3s)

Obtained as a sepia oil in 67% yield (50 mg).  $R_f$  (*n*-pentane/diethyl ether 1:1) = 0.60.  $^1\text{H}$  NMR (400 MHz,  $\text{CDCl}_3$ )  $\delta$  8.73 (s, 1H), 8.60 (d,  $J = 4.8$  Hz, 1H), 7.78 (d,  $J = 7.8$  Hz, 1H), 7.34 – 7.26 (m, 1H).  $^{19}\text{F}$  NMR (376 MHz,  $\text{CDCl}_3$ )  $\delta$  -35.7 (s, 3F).  $^{13}\text{C}$  NMR (101 MHz,  $\text{CDCl}_3$ )  $\delta$  152.5 (s), 149.7 (s), 138.9 (s), 123.1 (s), 120.6 (q,  $J = 336.4$  Hz), 119.2 (s), 103.8 (d,  $J = 1.1$  Hz), 66.0 (q,  $J = 3.0$  Hz). IR (KBr):  $\nu$  2952, 1563, 1475, 1408, 1155, 1094, 1022, 804, 741, 703  $\text{cm}^{-1}$ . GC-MS  $m/z$  250 ( $\text{M}^+$ ). HRMS (EI)  $m/z$ : Calcd. for  $\text{C}_8\text{H}_4\text{NF}_3^{74}\text{Se}$ : 244.9521; Found: 244.9517.

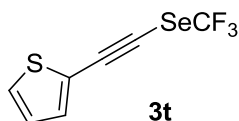

### 2-((Trifluoromethylselanyl)ethynyl)thiophene (3t)

Obtained as a yellow oil in 72% yield (55 mg).  $R_f$  (*n*-pentane/diethyl ether 5:1) = 0.79.  $^1\text{H}$  NMR (400 MHz,  $\text{CDCl}_3$ )  $\delta$  7.45 – 7.35 (m, 2H), 7.05 (t,  $J = 3.6$  Hz, 1H).  $^{19}\text{F}$  NMR (376 MHz,  $\text{CDCl}_3$ )  $\delta$  -36.2 (s, 3F).  $^{13}\text{C}$  NMR (101 MHz,  $\text{CDCl}_3$ )  $\delta$  134.8 (s), 129.7 (s), 127.2 (s), 121.9 (s), 120.6 (q,  $J = 337.0$  Hz), 100.4 (d,  $J = 1.1$  Hz), 66.8 (q,  $J = 3.1$  Hz). IR (KBr):  $\nu$  2926, 2854, 2153, 1418, 1157, 1096, 855, 835, 741, 705  $\text{cm}^{-1}$ . GC-MS  $m/z$  255 ( $\text{M}^+$ ). HRMS (EI)  $m/z$ : Calcd. for  $\text{C}_7\text{H}_3\text{F}_3\text{S}^{74}\text{Se}$ : 249.9132; Found:

249.9126.

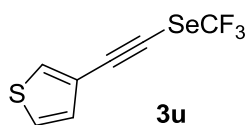

### 3-((Trifluoromethylselanyl)ethynyl)thiophene (**3u**)

Obtained as a yellow oil in 74% yield (57 mg).  $R_f$  (*n*-pentane) = 0.70.  $^1\text{H}$  NMR (400 MHz,  $\text{CDCl}_3$ )  $\delta$  7.63 (s, 1H), 7.36 – 7.29 (m, 1H), 7.20 (d,  $J = 4.2$  Hz, 1H).  $^{19}\text{F}$  NMR (376 MHz,  $\text{CDCl}_3$ )  $\delta$  -36.2 (s, 3F).  $^{13}\text{C}$  NMR (101 MHz,  $\text{CDCl}_3$ )  $\delta$  131.5 (s), 130.0 (s), 125.7 (s), 121.2 (s), 120.6 (q,  $J = 337.0$  Hz), 102.2 (s), 61.7 (q,  $J = 3.0$  Hz). IR (KBr):  $\nu$  2952, 2161, 1358, 1155, 1091, 949, 872, 783, 741, 625  $\text{cm}^{-1}$ . GC-MS  $m/z$  255 ( $\text{M}^+$ ). HRMS (EI)  $m/z$ : Calcd. for  $\text{C}_7\text{H}_3\text{F}_3\text{S}^{74}\text{Se}$ : 249.9132; Found: 249.9130.

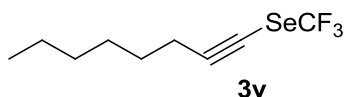

### Oct-1-yn-1-yl(trifluoromethyl)selane (**3v**)

Obtained as a yellow oil in 57% yield (44 mg).  $R_f$  (*n*-pentane) = 0.47.  $^1\text{H}$  NMR (400 MHz,  $\text{CDCl}_3$ )  $\delta$  2.45 (t,  $J = 7.0$  Hz, 2H), 1.66 – 1.51 (m, 2H), 1.49 – 1.21 (m, 6H), 0.92 (t,  $J = 6.5$  Hz, 3H).  $^{19}\text{F}$  NMR (376 MHz,  $\text{CDCl}_3$ )  $\delta$  -37.0 (s, 3F).  $^{13}\text{C}$  NMR (101 MHz,  $\text{CDCl}_3$ )  $\delta$  120.7 (q,  $J = 335.6$  Hz), 109.5 (d,  $J = 1.0$  Hz), 51.1 (q,  $J = 3.1$  Hz), 31.2 (s), 28.4 (s), 28.2 (s), 22.5 (s), 20.5 (s), 14.0 (s). IR (KBr):  $\nu$  2959, 2933, 2861, 2190, 1467, 1380, 1326, 1156, 1097, 741  $\text{cm}^{-1}$ . GC-MS  $m/z$  257 ( $\text{M}^+$ ). HRMS (EI)  $m/z$ : Calcd. for  $\text{C}_9\text{H}_{13}\text{F}_3^{74}\text{Se}$ : 252.0194; Found: 252.0189.

**Procedure for gram scale reaction for synthesis of (*p*-tolylethynyl)(trifluoromethyl)selane (3b):** 4-Ethynyltoluene (**2b**) (1.04 g, 9.0 mmol), [(bpy)Cu(SeCF<sub>3</sub>)<sub>2</sub>] **1** (3.98 g, 5.4 mmol, 0.60 equiv), DMP (7.63 g, 18 mmol, 2.0 equiv), KF (1.57 g, 27 mmol, 3.0 equiv), and DMF (25 mL) were added to a reaction tube equipped with a stir bar. The mixture was stirred at 25 °C for 16 hours. The reaction mixture was filtered through a pad of celite. The filtrate was added water (30 mL) at 0 °C. The resulting mixture was extracted with Et<sub>2</sub>O (3×20 mL), and the combined organic layers was washed with water, and then dried over MgSO<sub>4</sub>. The solvent was removed by rotary evaporation in an ice bath and the resulting product was purified by column chromatography on silica gel with pentane/Et<sub>2</sub>O. Compound **3b** was obtained in 84% yield (1.99 g).

**Procedure for the trifluoromethylselenolation of 1 with 4-ethynyltoluene (2b) in the presence of 1.0 equiv TEMPO:** 4-Ethynyltoluene (**2b**) (11.6 mg, 0.10 mmol), [(bpy)Cu(SeCF<sub>3</sub>)<sub>2</sub>] **1** (44.1 mg, 0.060 mmol), DMP (84.8 mg, 0.20 mmol, 2.0 equiv), KF (17.4 mg, 0.30 mmol, 3.0 equiv), TEMPO (15.6 mg, 0.10 mmol), and DMF (2.5 mL) were added to a reaction tube equipped with a stir bar. The mixture was stirred at 25 °C for 16 hours. The tube was removed from the oil bath and cooled to room temperature, and then 10 μL (trifluoromethoxy)benzene was added as an internal standard. The resulting mixture was filtered through a layer of Celite. The filtrate was analyzed by <sup>19</sup>F NMR and GC-MS. The yield of the (*p*-tolylethynyl)(trifluoromethyl)selane (**3b**) was calculated to be 65%.

## Experiments for Mechanistic Investigations

### (1). Procedure for reaction of [(bpy)Cu(SeCF<sub>3</sub>)<sub>2</sub>] (1) with Dess–Martin periodinane in the presence of KF.

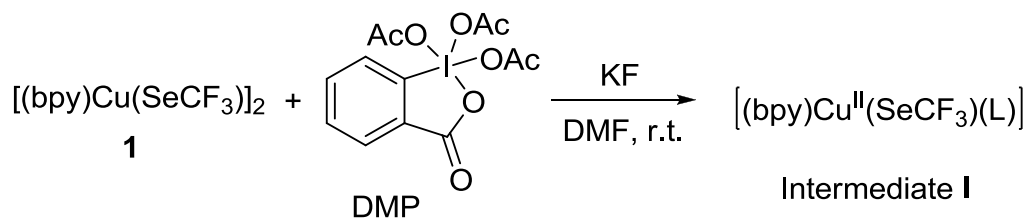

[(bpy)Cu(SeCF<sub>3</sub>)<sub>2</sub>] (**1**) (44 mg, 0.060 mmol), DMP (85 mg, 0.20 mmol), KF (17.4 mg, 0.30 mmol), and PhOCF<sub>3</sub> (10  $\mu$ L) as internal standard were weighed into a vial and dissolved in 2.0 mL of DMF. The contents of the vial were agitated and then transferred to an NMR tube. The NMR tube was agitated for 10 min and the <sup>19</sup>F NMR spectrum was acquired. The yield of the intermediate **I** was calculated to be 75% based on **1**.

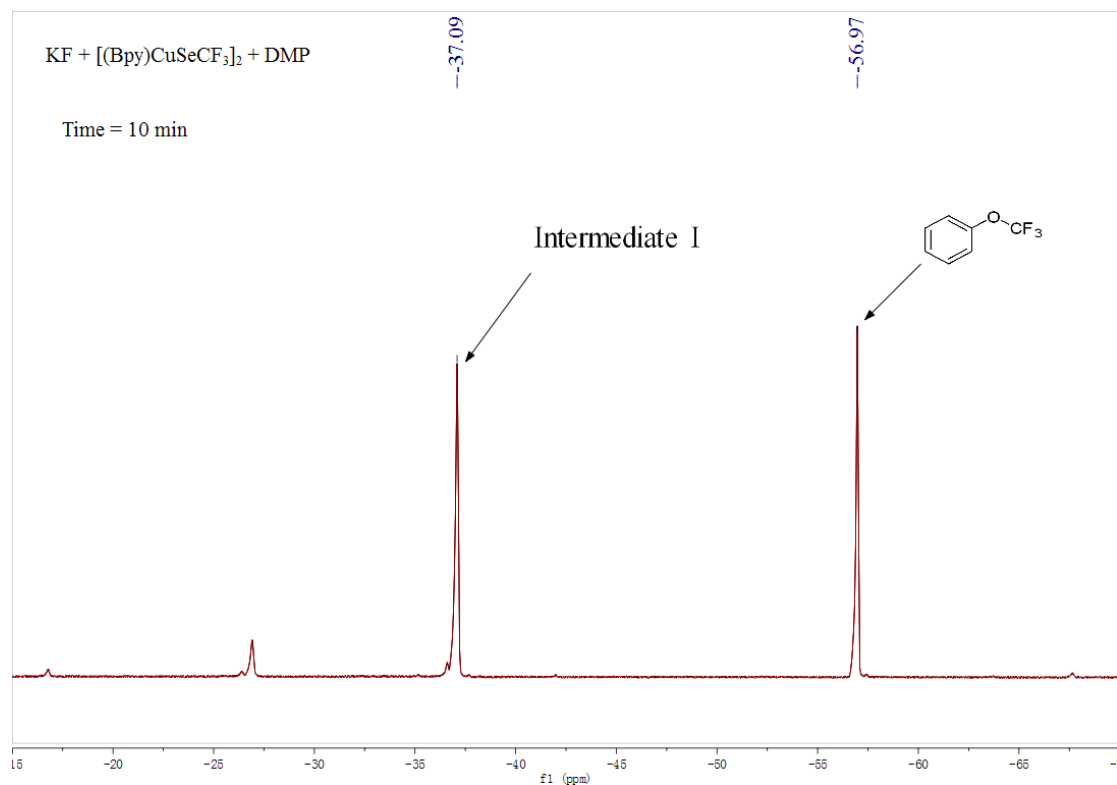

**(2). Procedure for reaction of intermediate I with 4-ethynyltoluene (2b).**

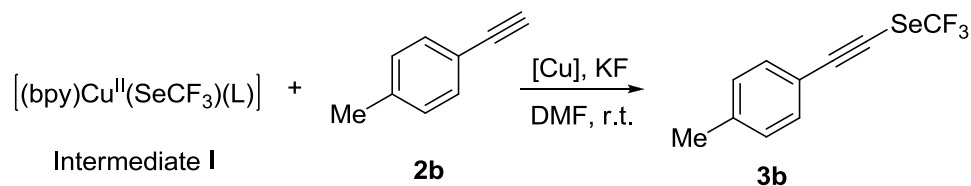

4-Ethynyltoluene (**2b**) (11.6 mg, 0.10 mmol) was then added to the above intermediate **I** solution. The resulting mixture was measured by  $^{19}\text{F}$  NMR at regular intervals at 25 °C until the yield did not change. The resulting mixture was filtered through a layer of Celite. The filtrate was analyzed by GC-MS. The yield of the (*p*-tolylethynyl)(trifluoromethyl)selane (**3b**) was calculated to be 82% based on **2b**.

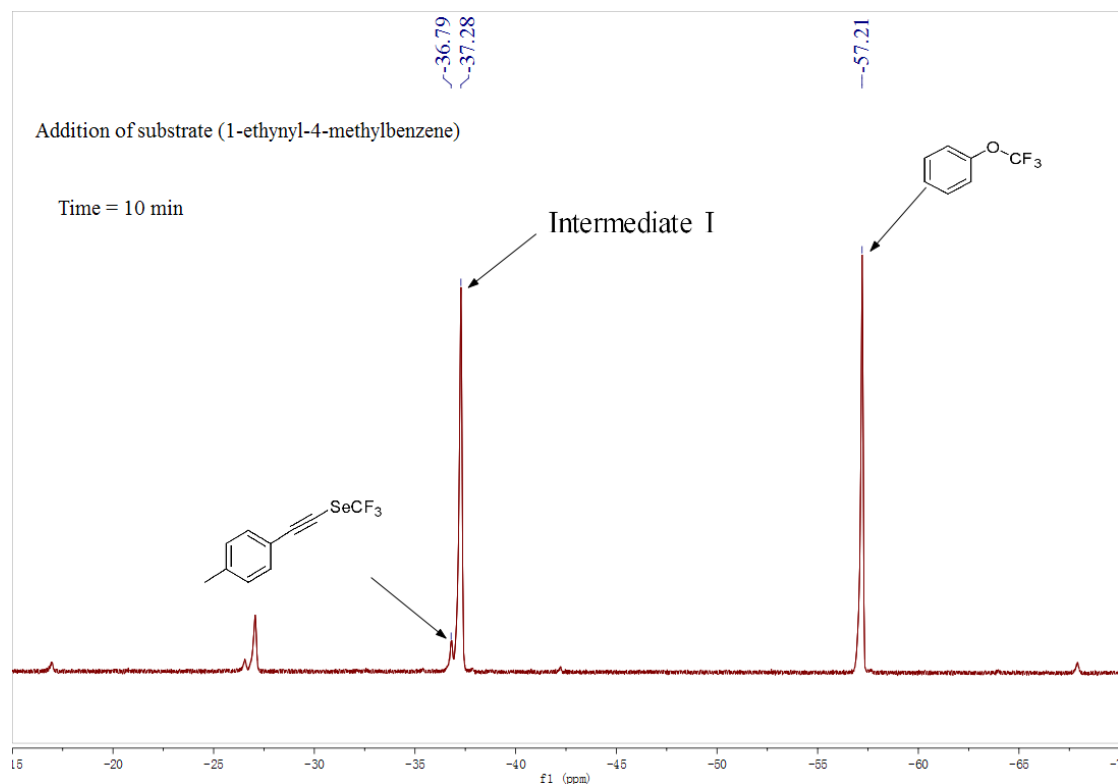

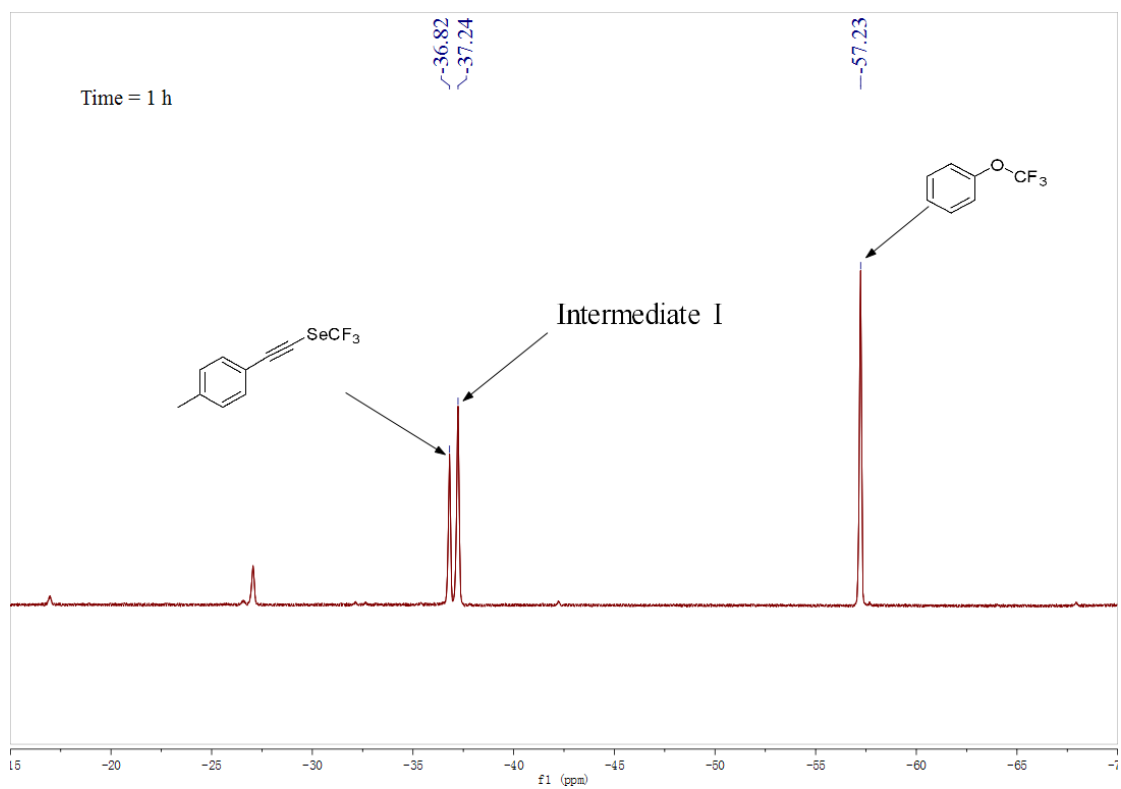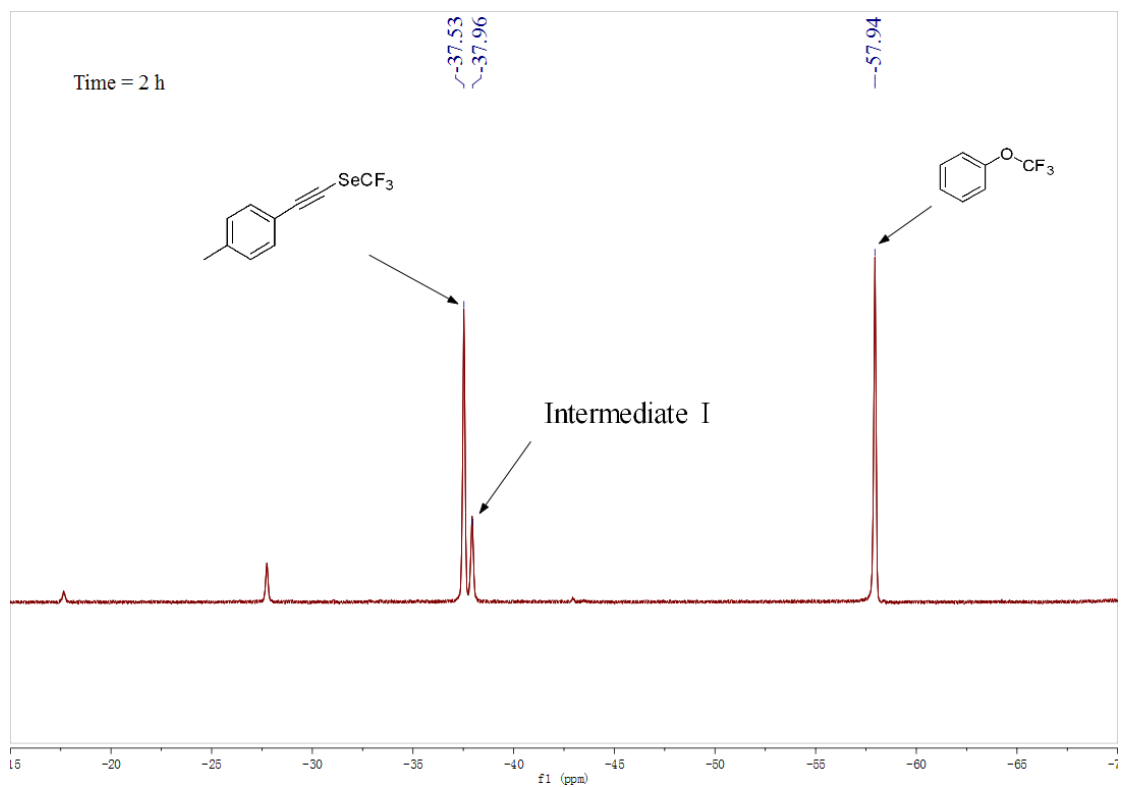

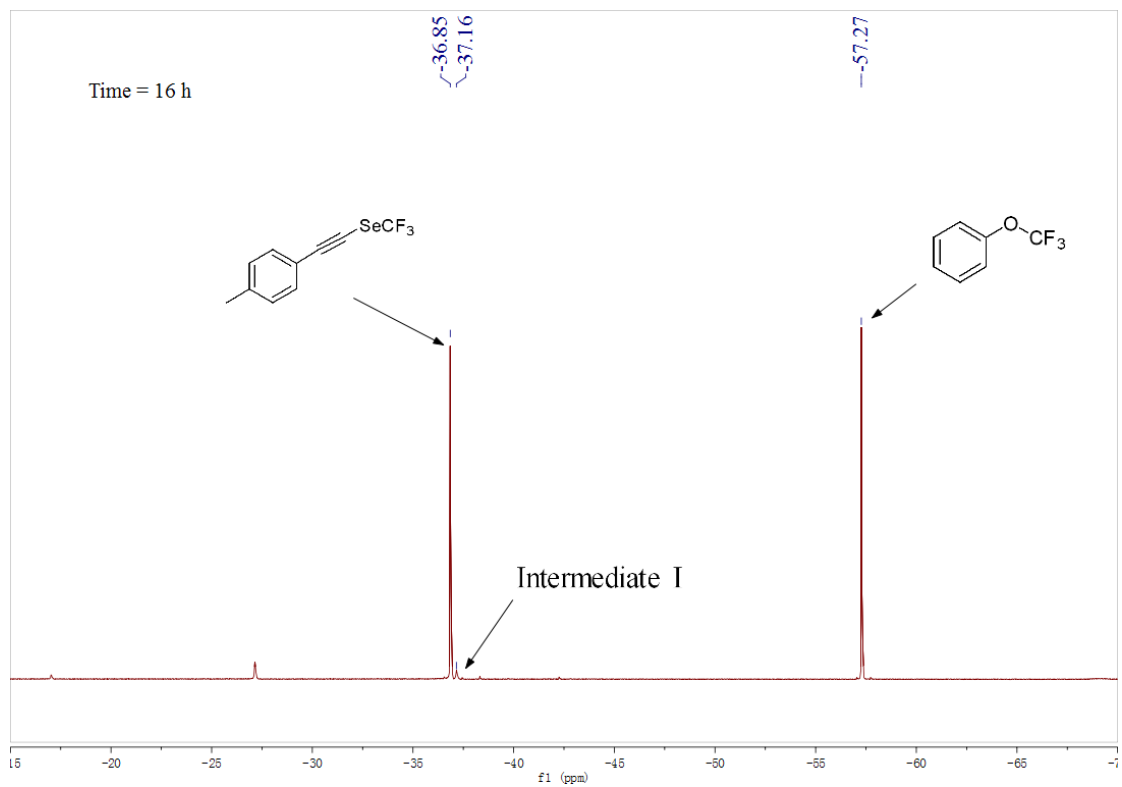



## XPS of intermediate I

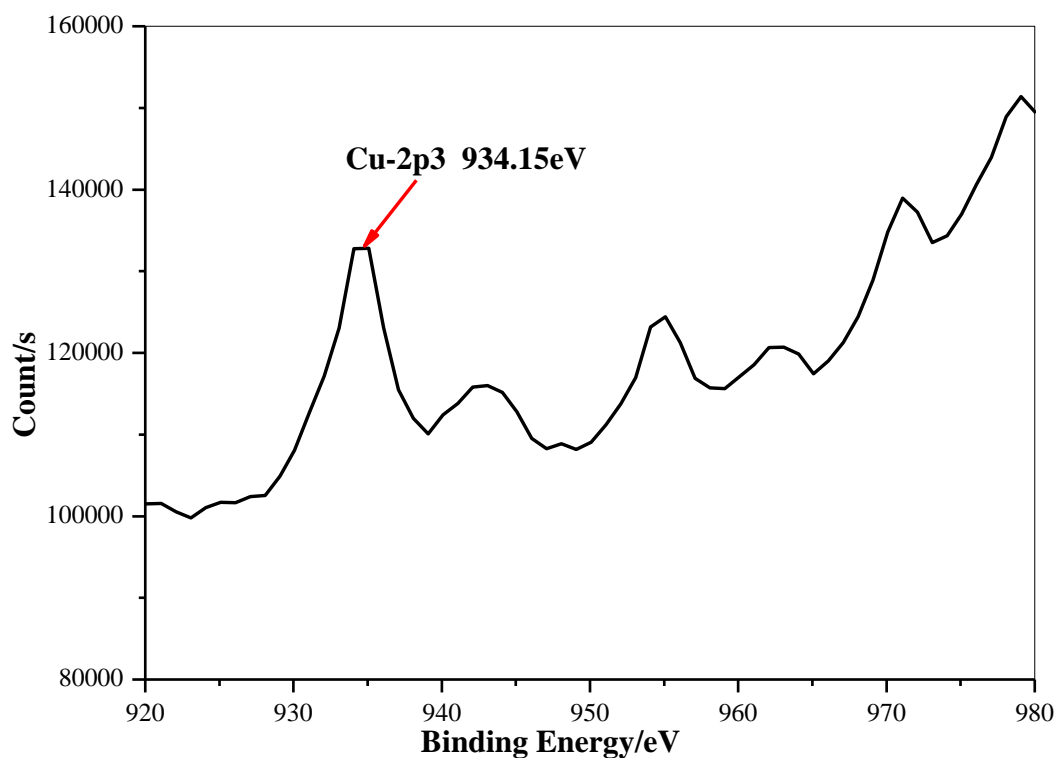

|                        |                            |
|------------------------|----------------------------|
| Total acquisition time | 2 mins 16.0 secs           |
| Number of Scans        | 1                          |
| Source Gun Type        | Al K Alpha                 |
| Spot Size              | 500 $\mu\text{m}$          |
| Lens Mode              | Standard                   |
| Analyser Mode          | CAE : Pass Energy 100.0 eV |
| Energy Step Size       | 1.000 eV                   |
| Number of Energy Steps | 1361                       |

# Copies of $^1\text{H}$ NMR, $^{19}\text{F}$ NMR and $^{13}\text{C}$ NMR Spectra for Compounds 3a–v

## $^1\text{H}$ NMR spectrum of 3a in $\text{CDCl}_3$

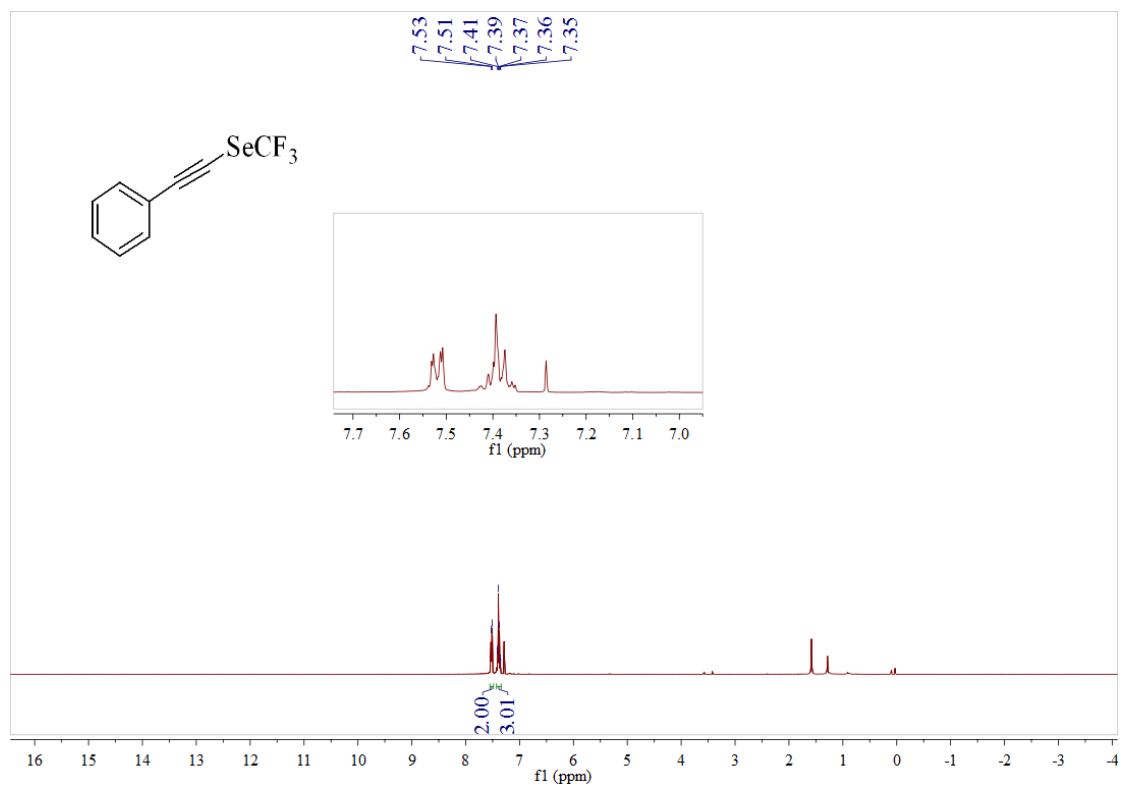

## $^{13}\text{C}$ NMR spectrum of 3a in $\text{CDCl}_3$

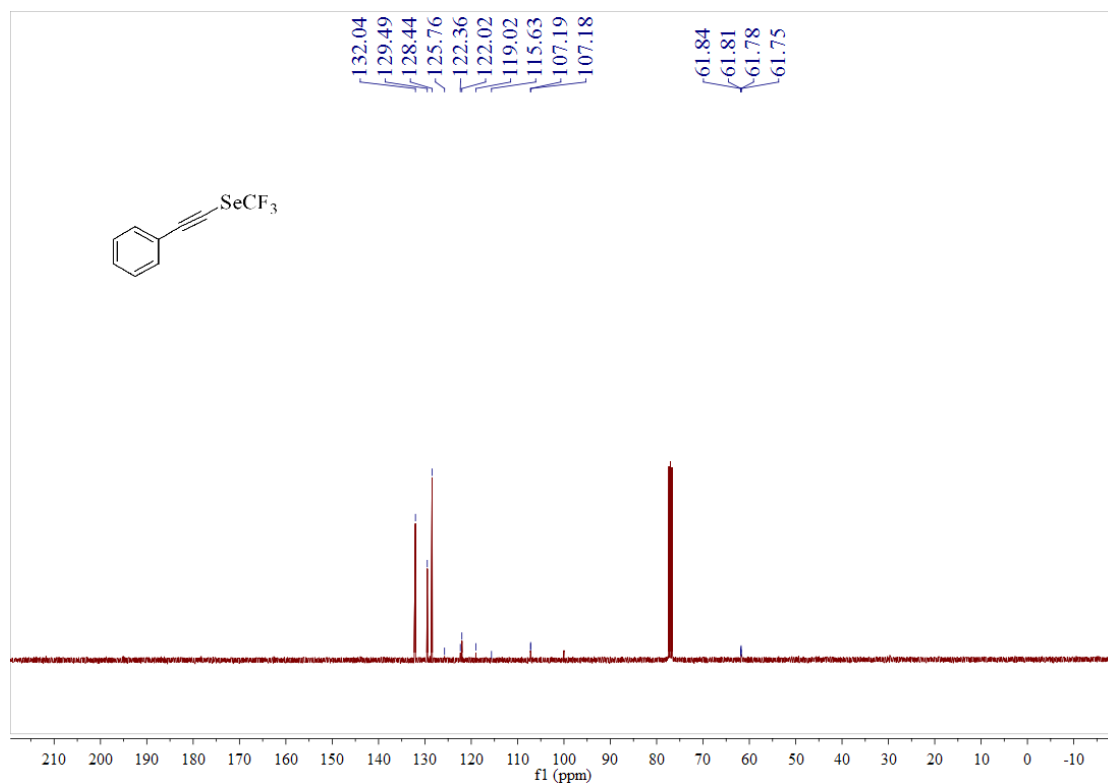

<sup>19</sup>F NMR spectrum of **3a** in CDCl<sub>3</sub>

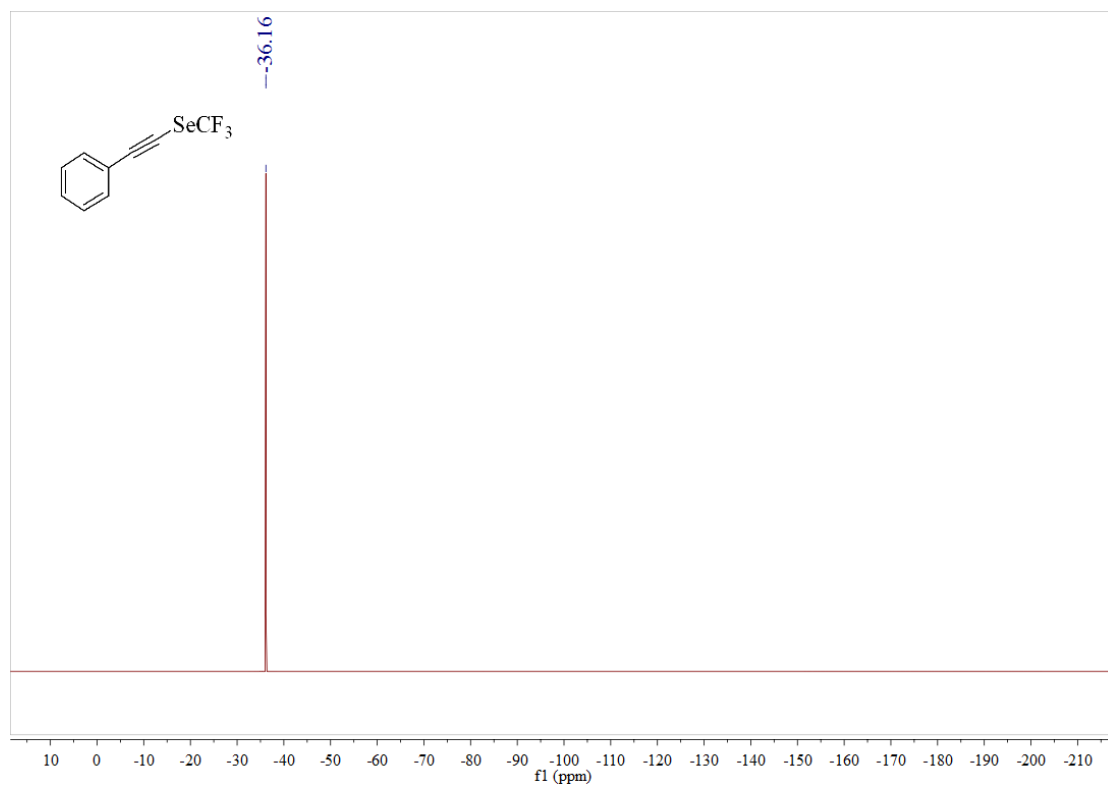

<sup>1</sup>H NMR spectrum of **3b** in CDCl<sub>3</sub>

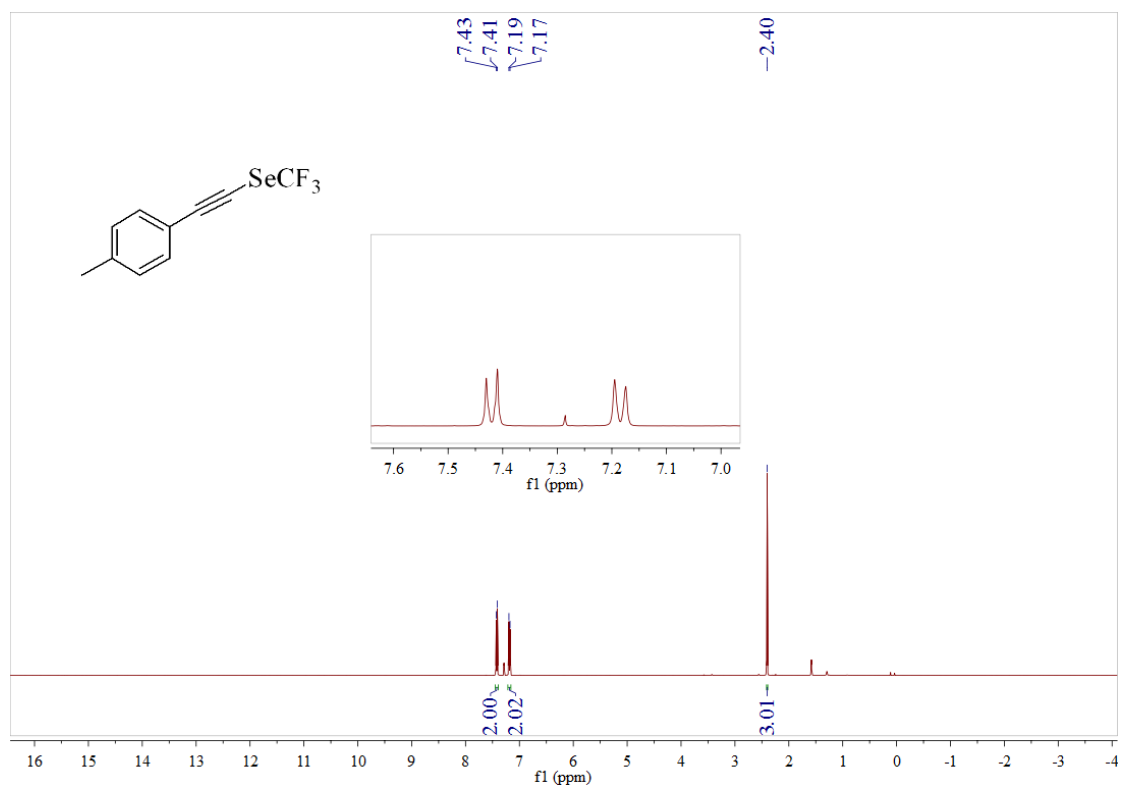

<sup>13</sup>C NMR spectrum of **3b** in CDCl<sub>3</sub>

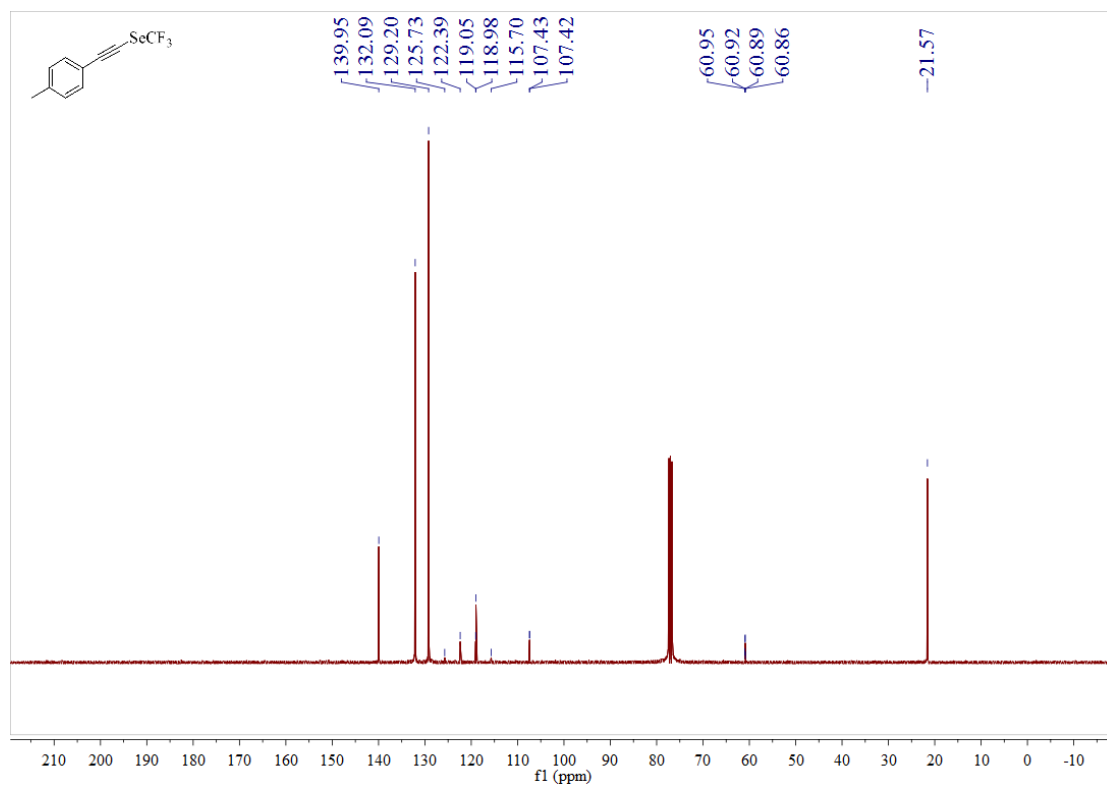

<sup>19</sup>F NMR spectrum of **3b** in CDCl<sub>3</sub>

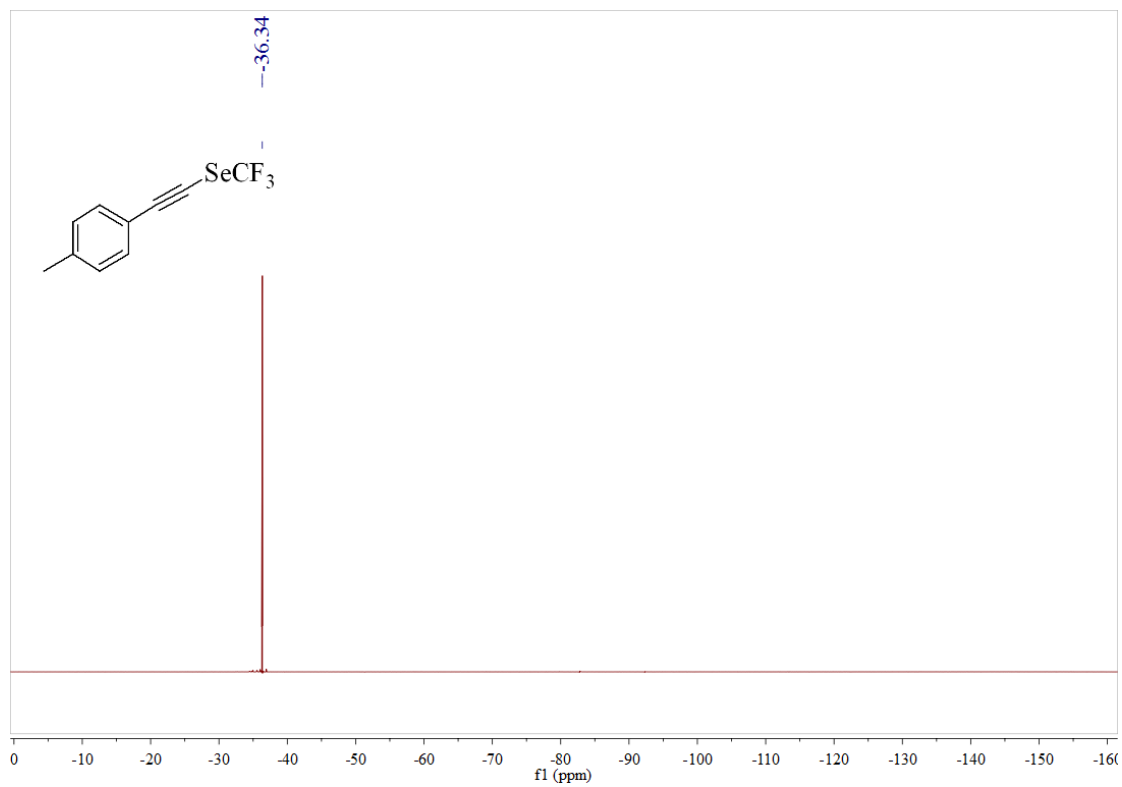

$^1\text{H}$  NMR spectrum of **3c** in  $\text{CDCl}_3$

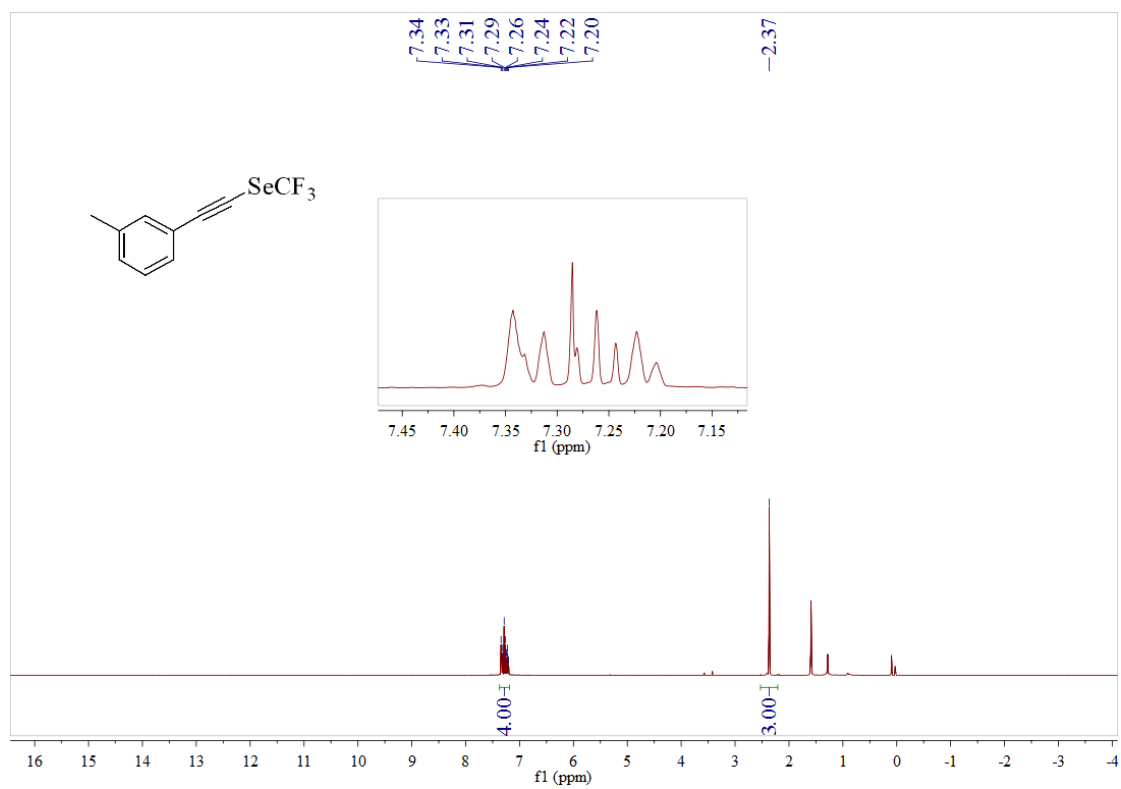

$^{13}\text{C}$  NMR spectrum of **3c** in  $\text{CDCl}_3$

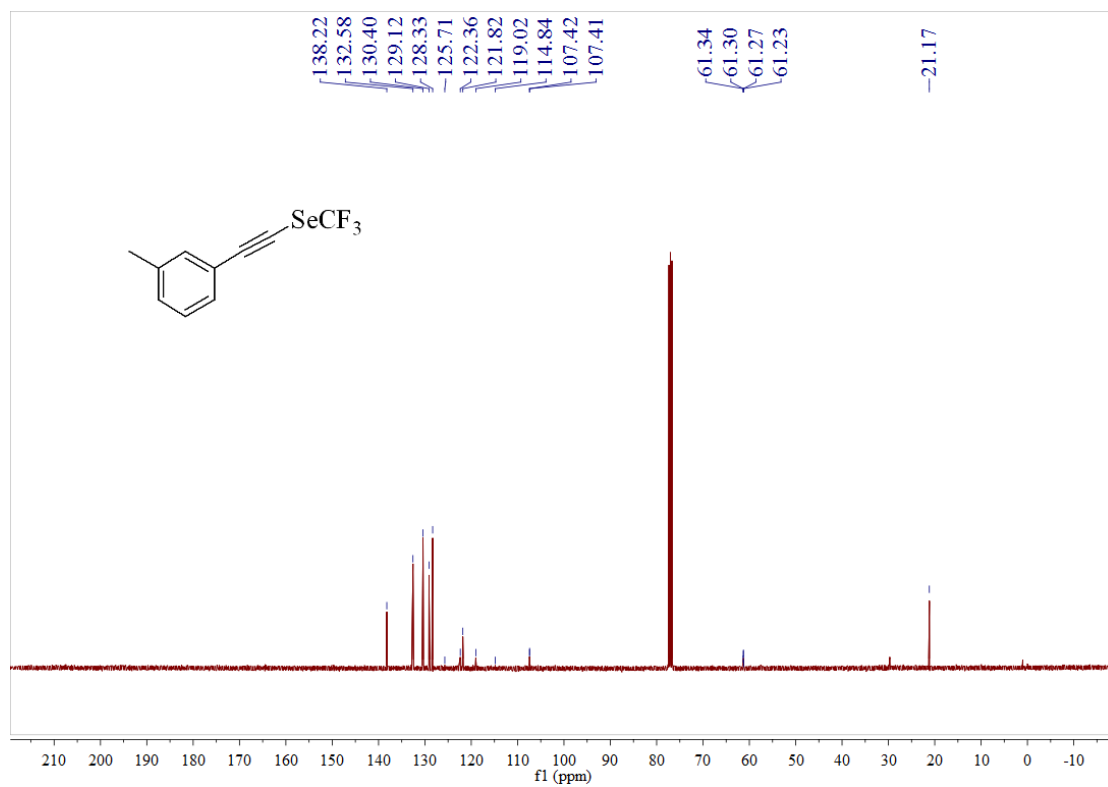

**<sup>19</sup>F NMR spectrum of 3c in CDCl<sub>3</sub>**

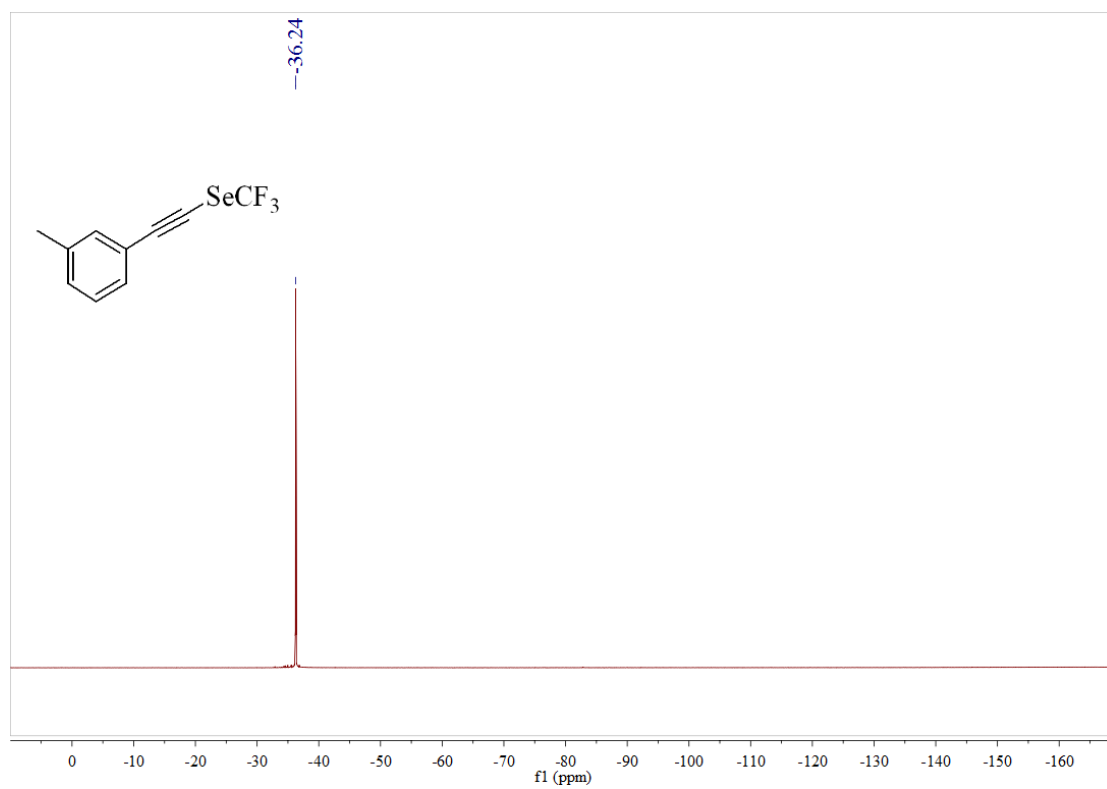

**<sup>1</sup>H NMR spectrum of 3d in CDCl<sub>3</sub>**

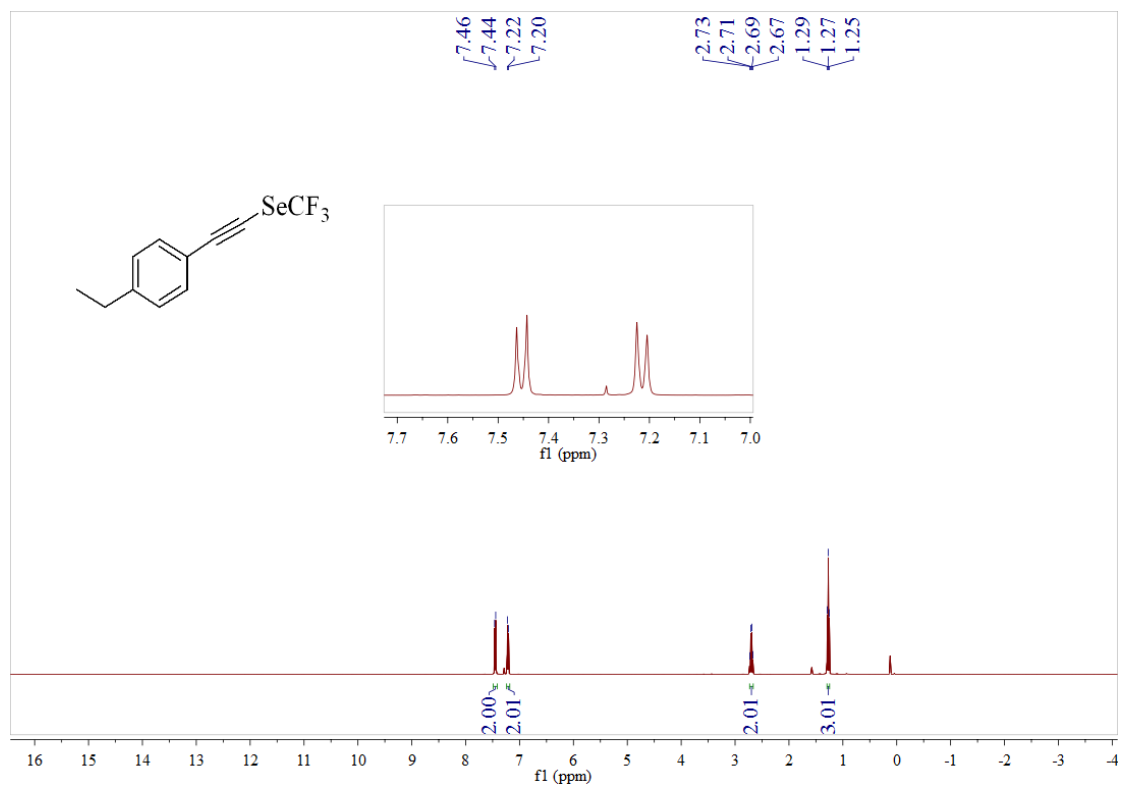

<sup>13</sup>C NMR spectrum of **3d** in CDCl<sub>3</sub>

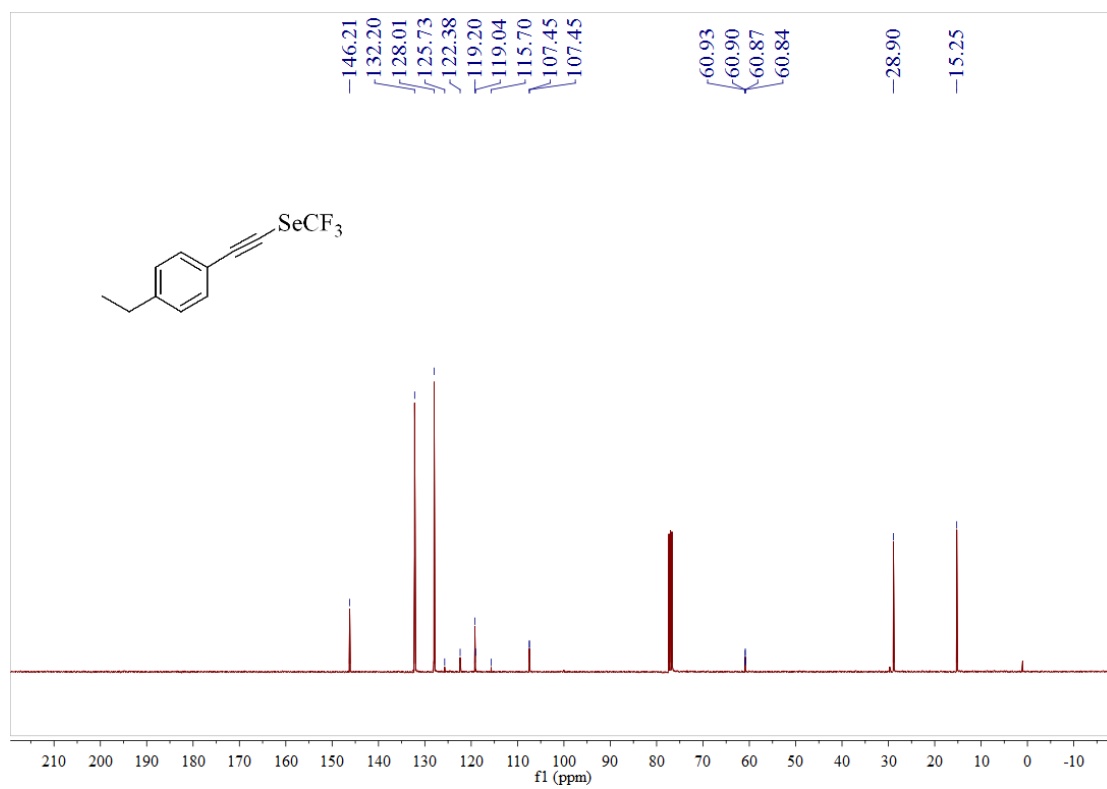

<sup>19</sup>F NMR spectrum of **3d** in CDCl<sub>3</sub>

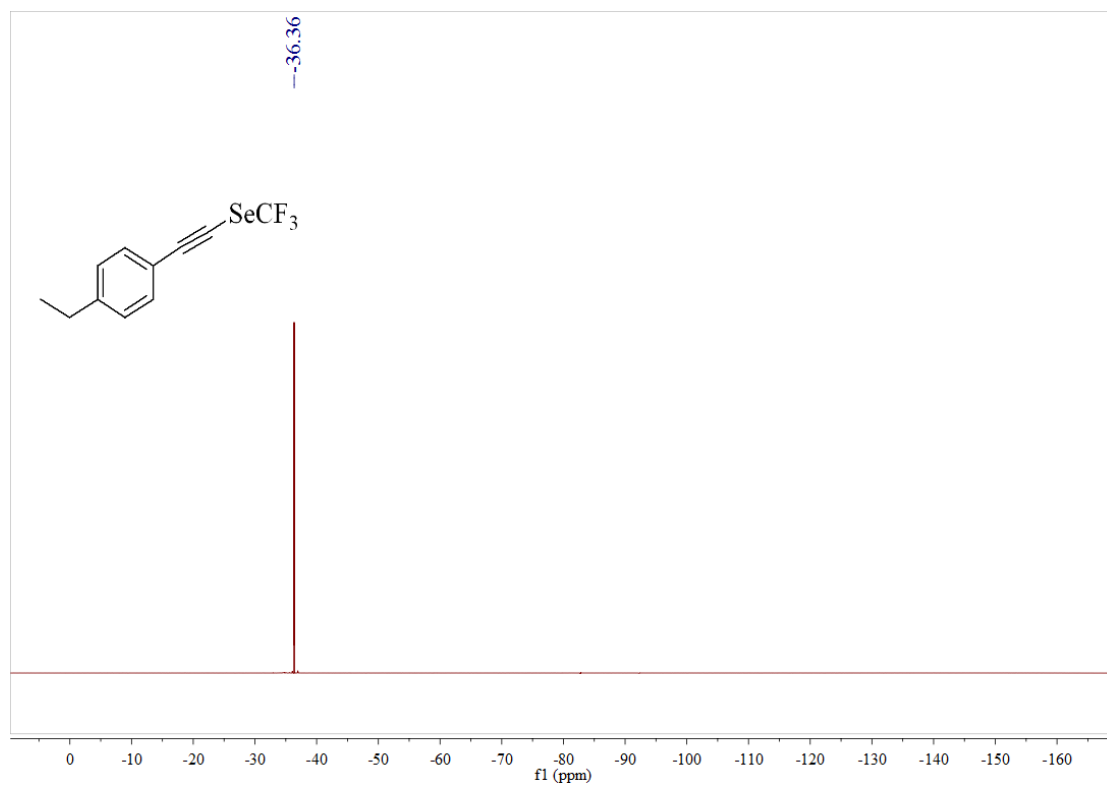

$^1\text{H}$  NMR spectrum of **3e** in  $\text{CDCl}_3$

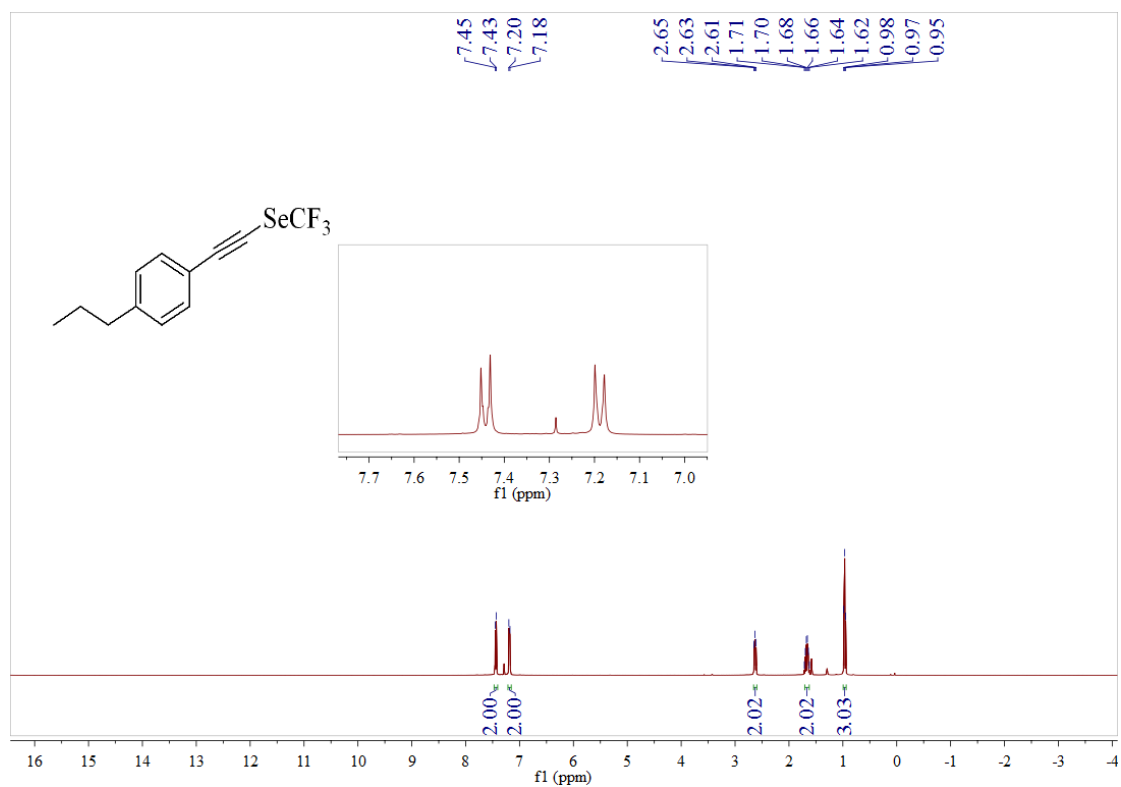

$^{13}\text{C}$  NMR spectrum of **3e** in  $\text{CDCl}_3$

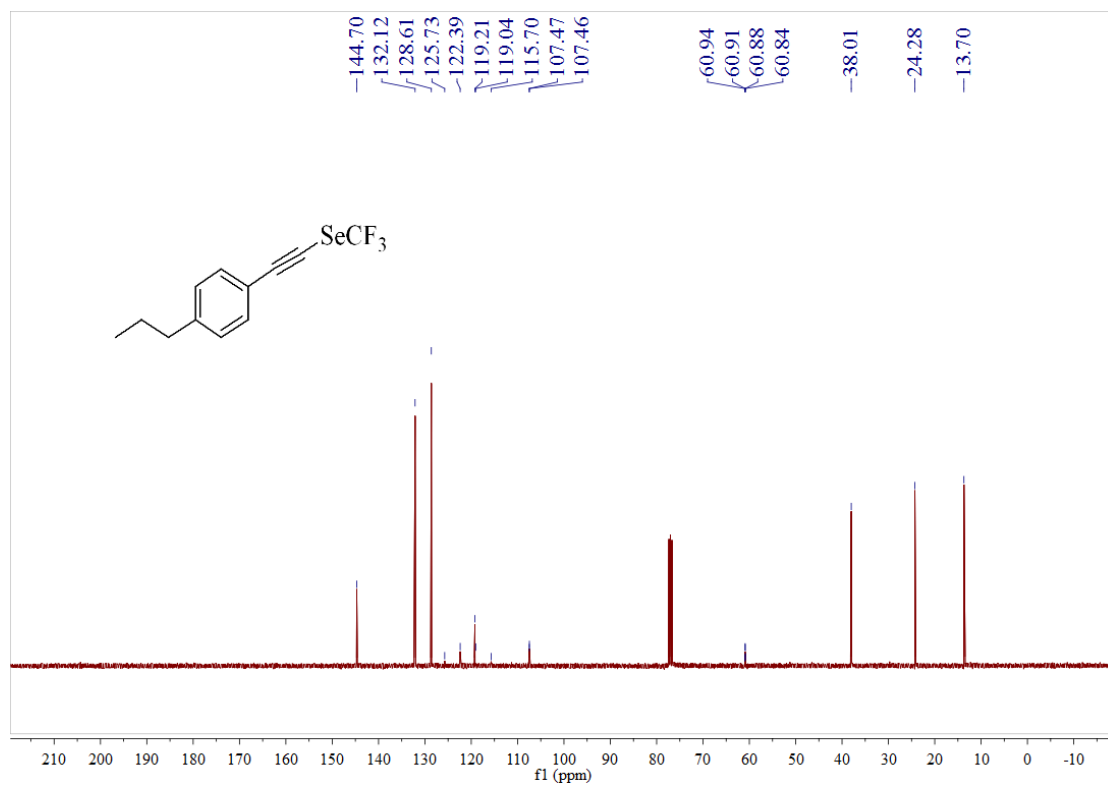



<sup>19</sup>F NMR spectrum of **3e** in CDCl<sub>3</sub>

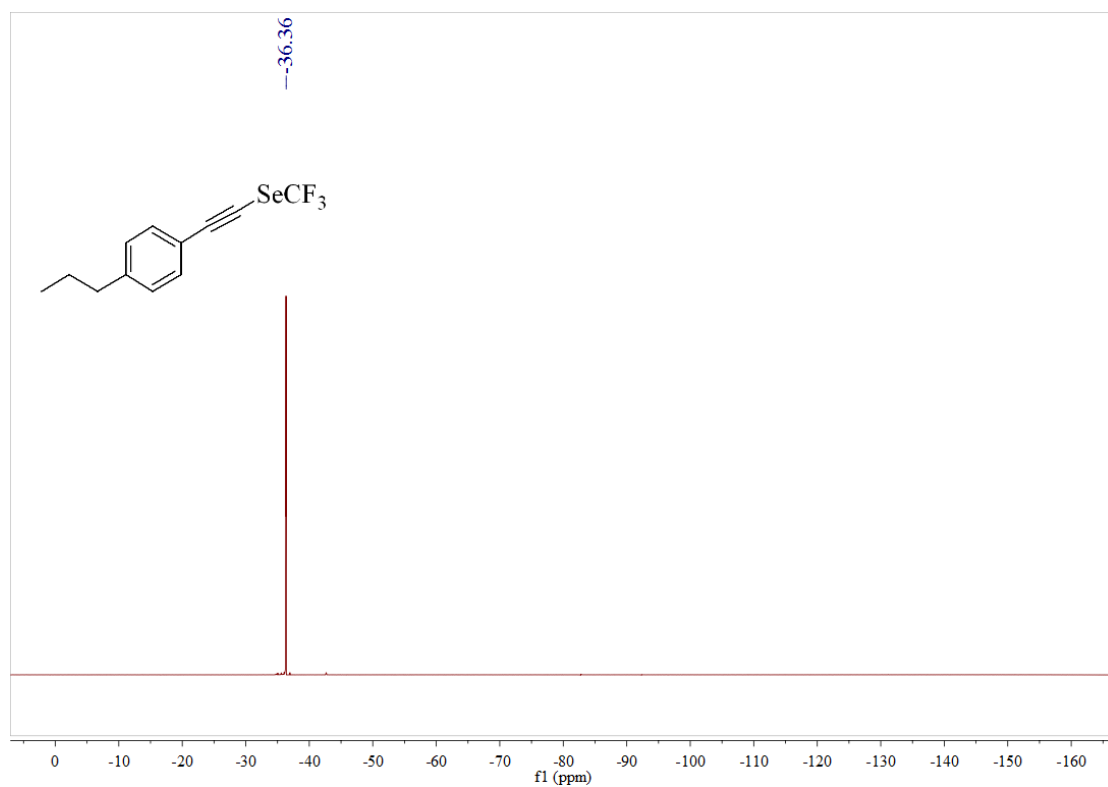

<sup>1</sup>H NMR spectrum of **3f** in CDCl<sub>3</sub>

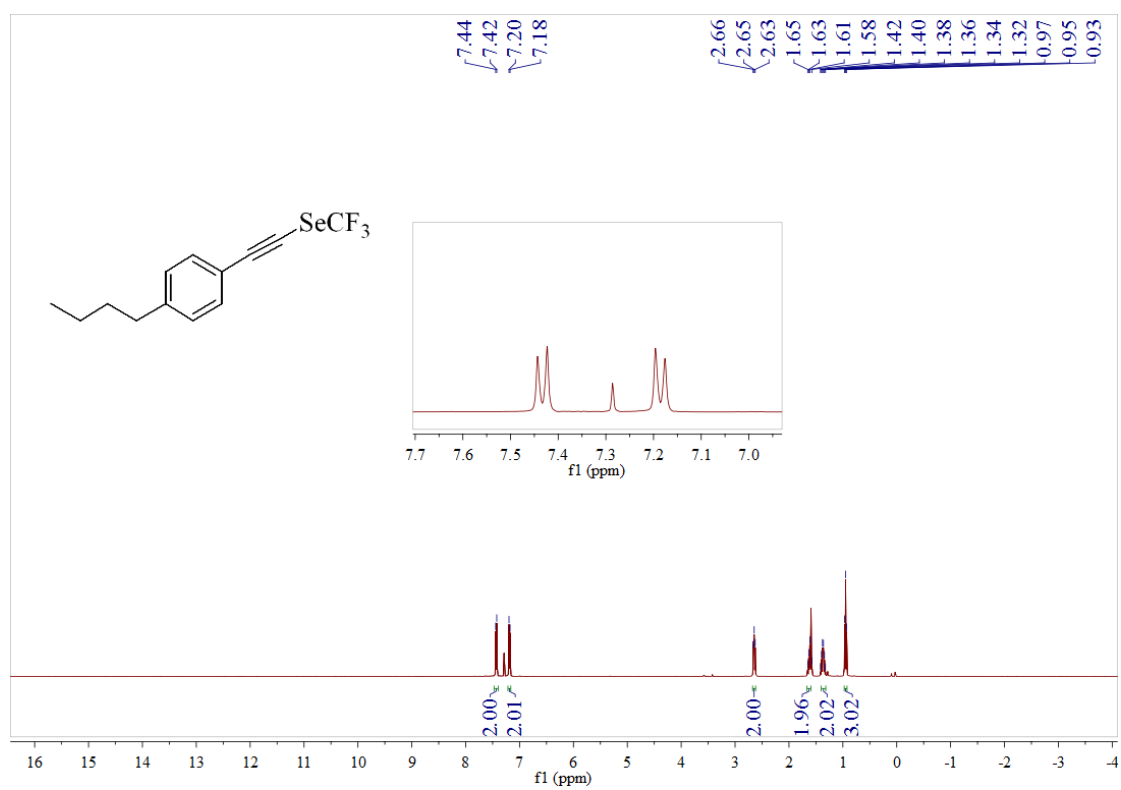

$^{13}\text{C}$  NMR spectrum of **3f** in  $\text{CDCl}_3$

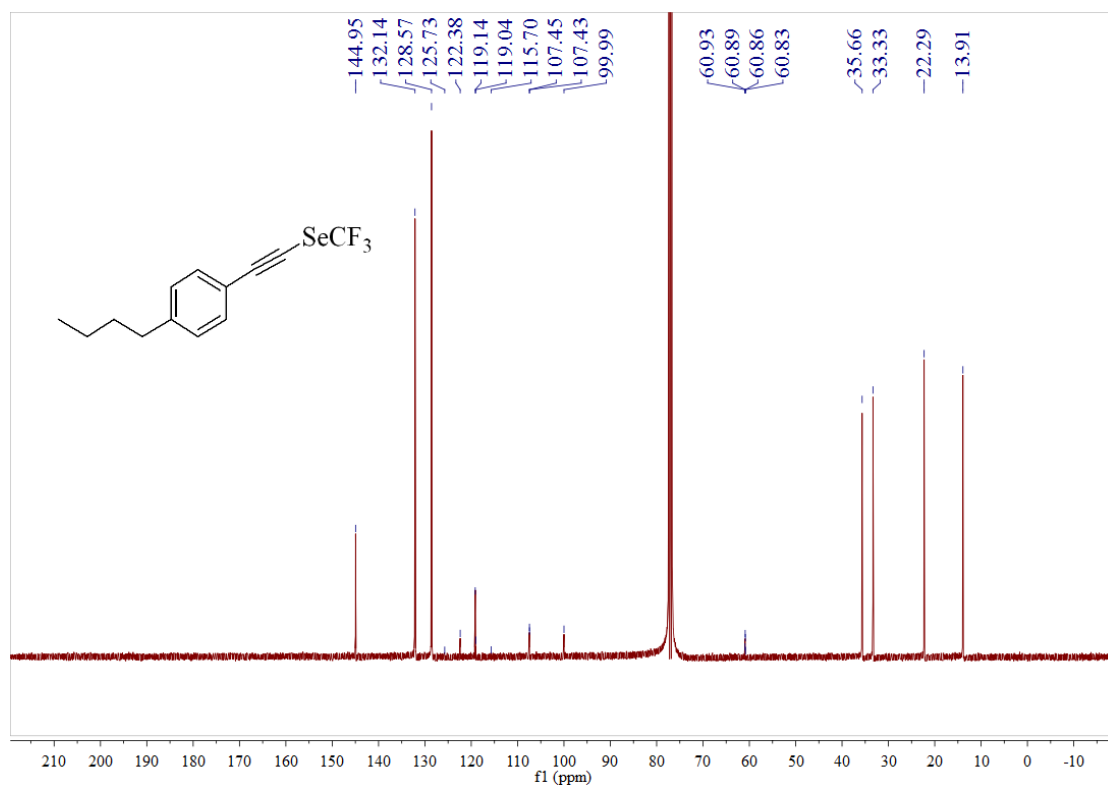

$^{19}\text{F}$  NMR spectrum of **3f** in  $\text{CDCl}_3$

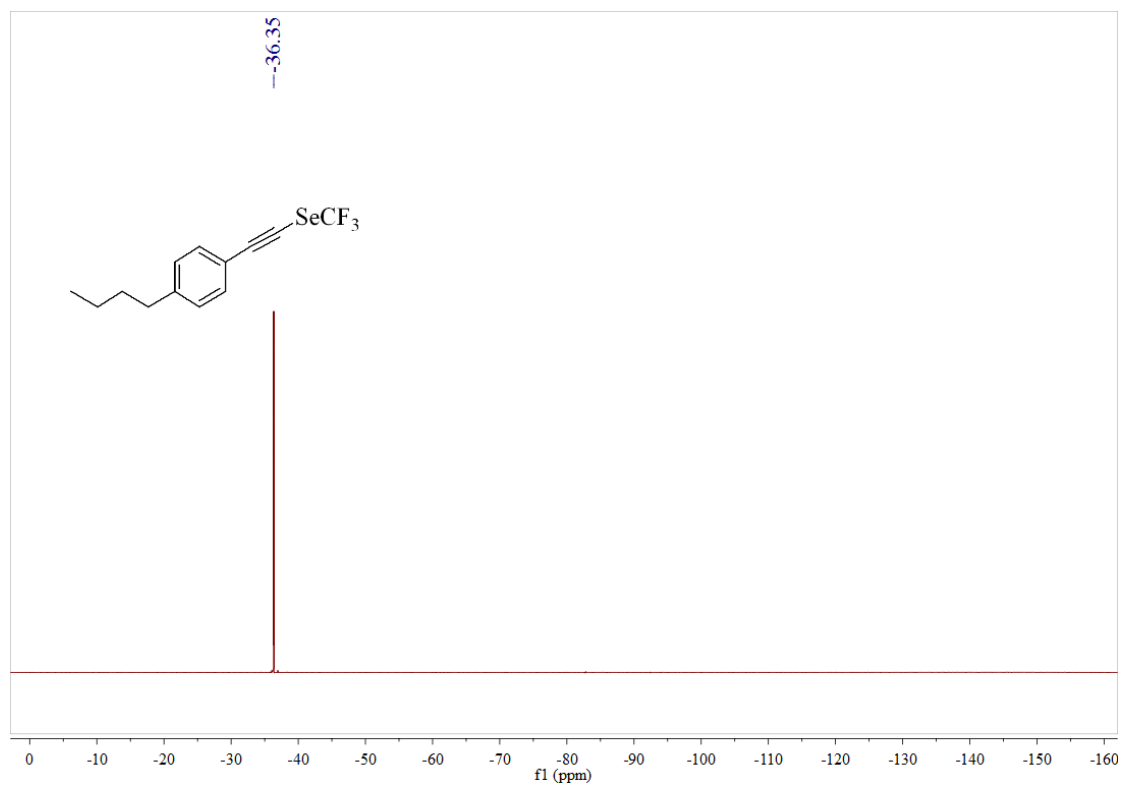

$^1\text{H}$  NMR spectrum of **3g** in  $\text{CDCl}_3$

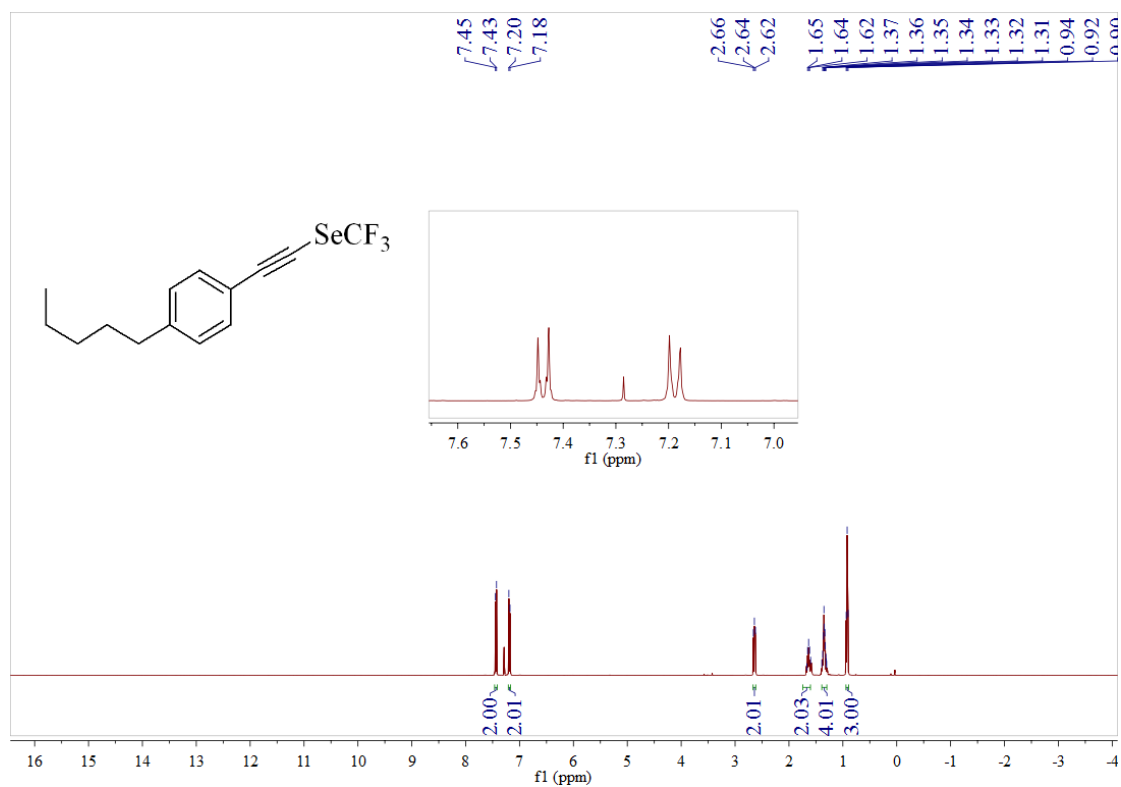

$^{13}\text{C}$  NMR spectrum of **3g** in  $\text{CDCl}_3$

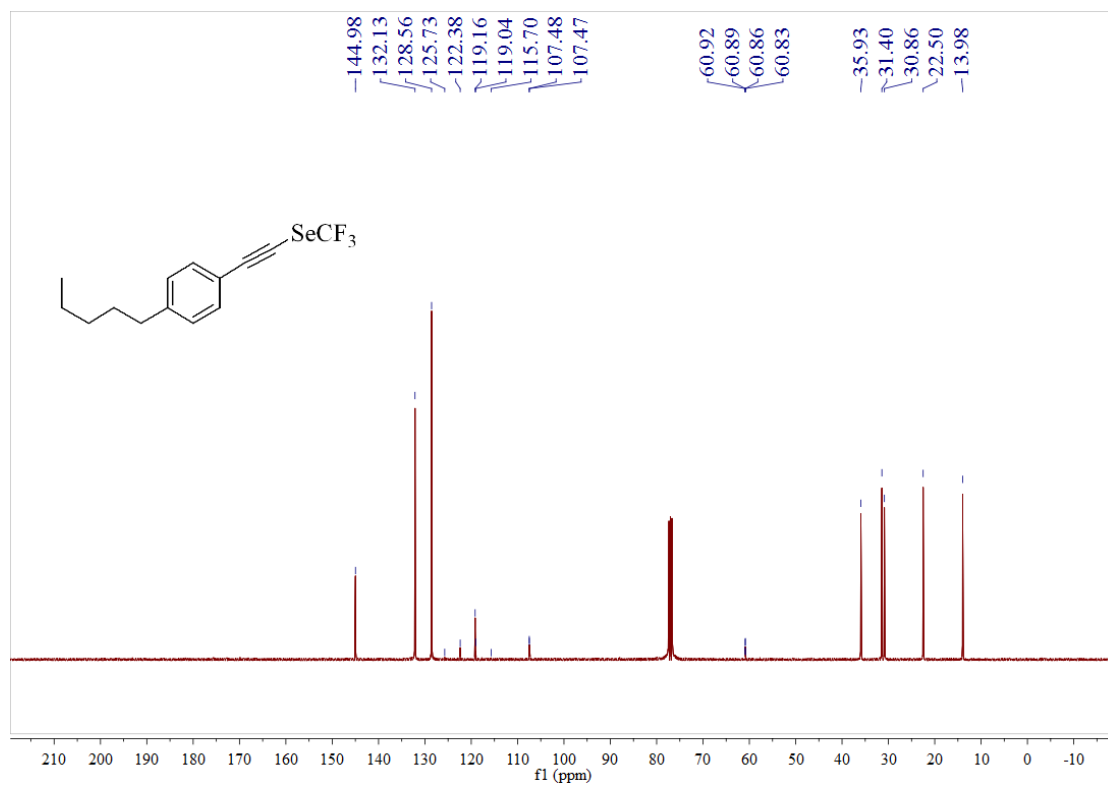

<sup>19</sup>F NMR spectrum of **3g** in CDCl<sub>3</sub>

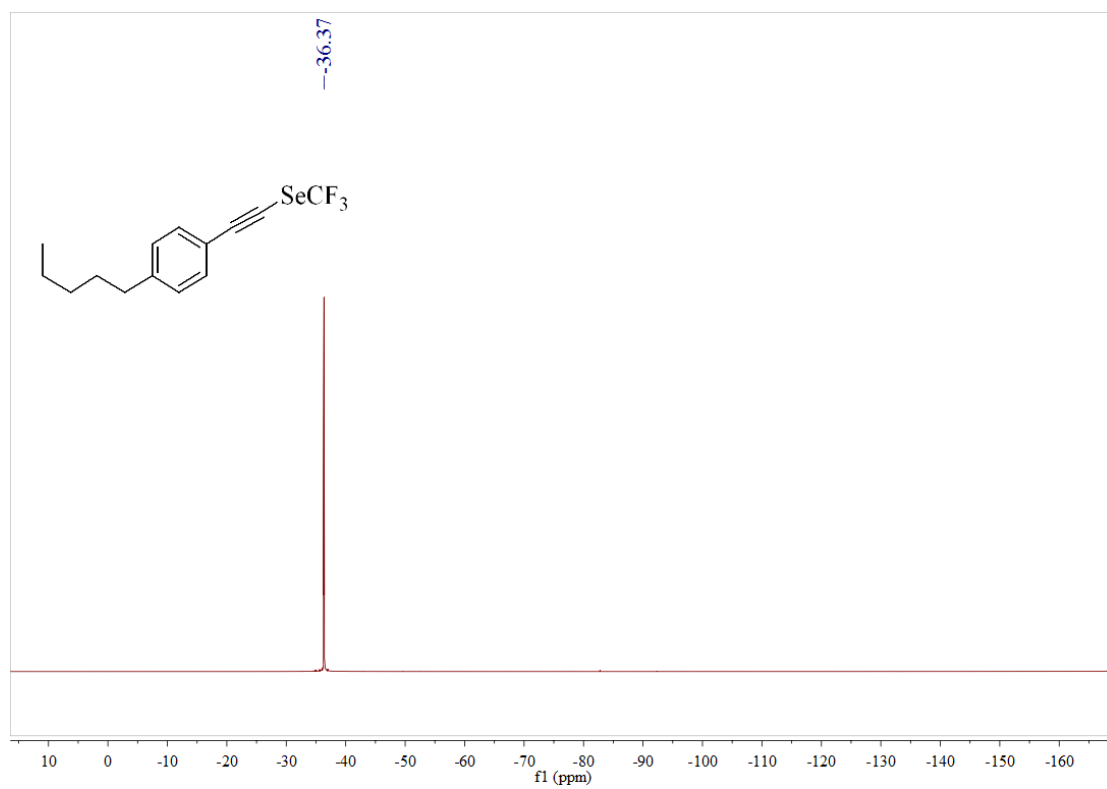

<sup>1</sup>H NMR spectrum of **3h** in CDCl<sub>3</sub>

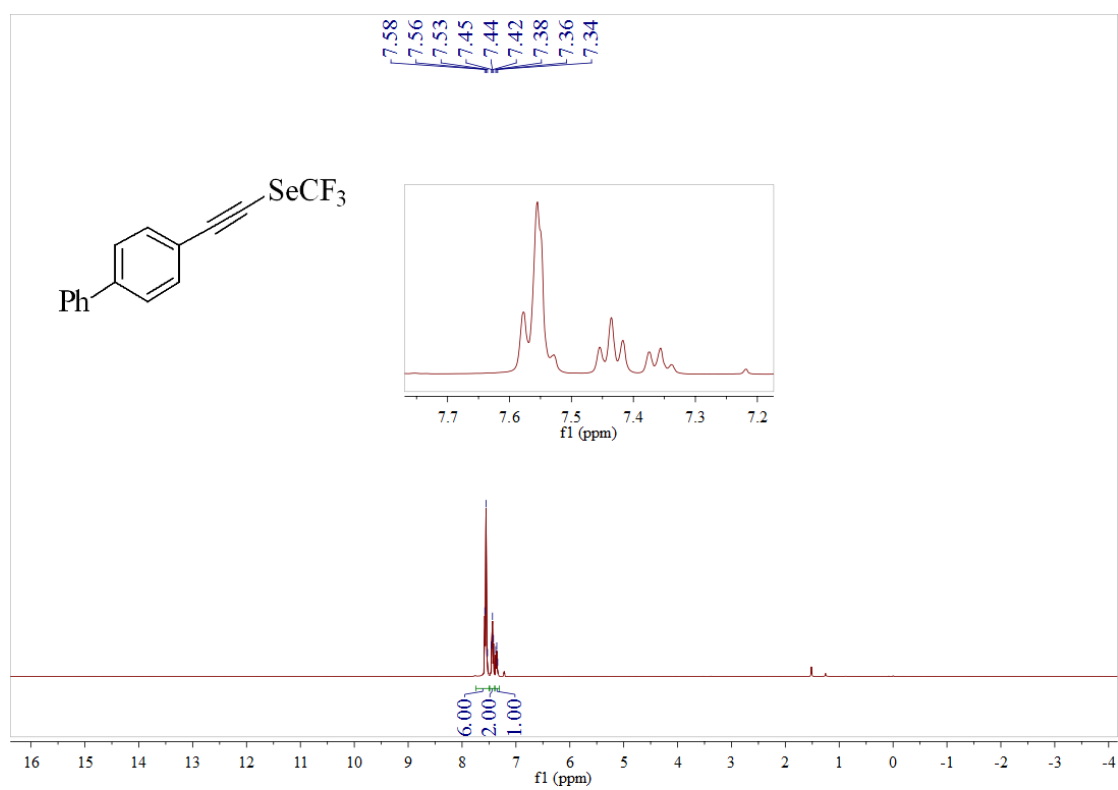

<sup>13</sup>C NMR spectrum of **3h** in CDCl<sub>3</sub>

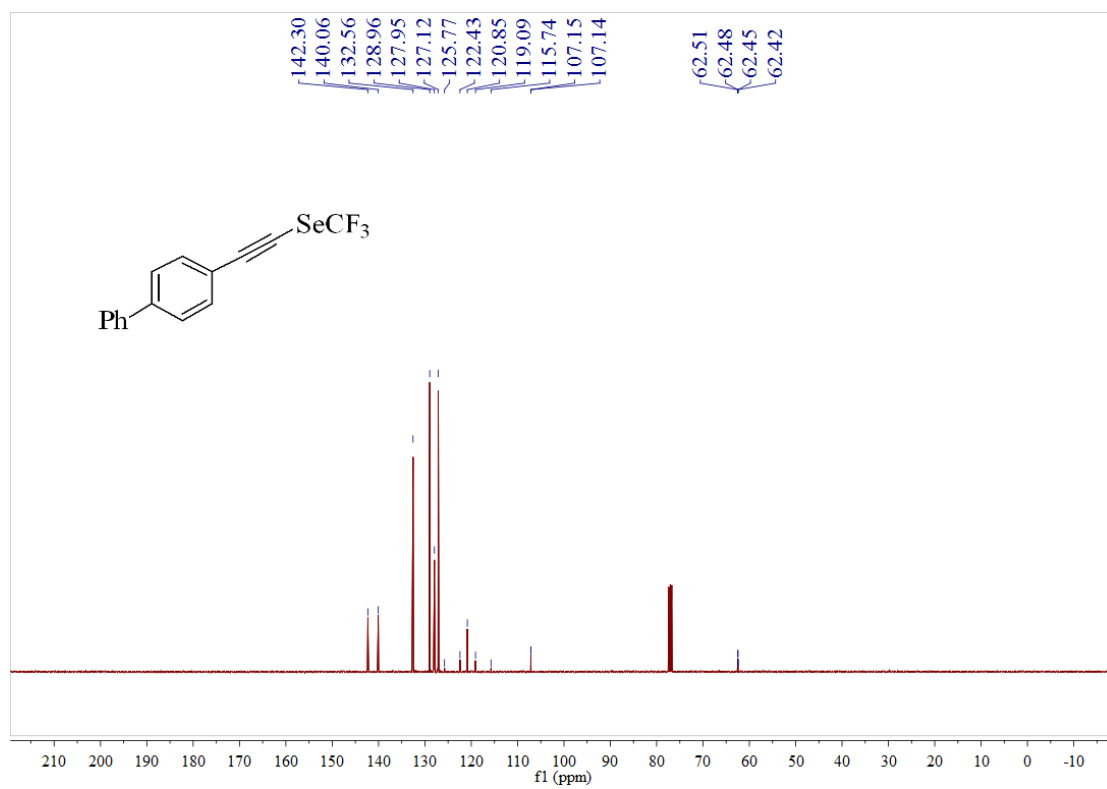

<sup>19</sup>F NMR spectrum of **3h** in CDCl<sub>3</sub>

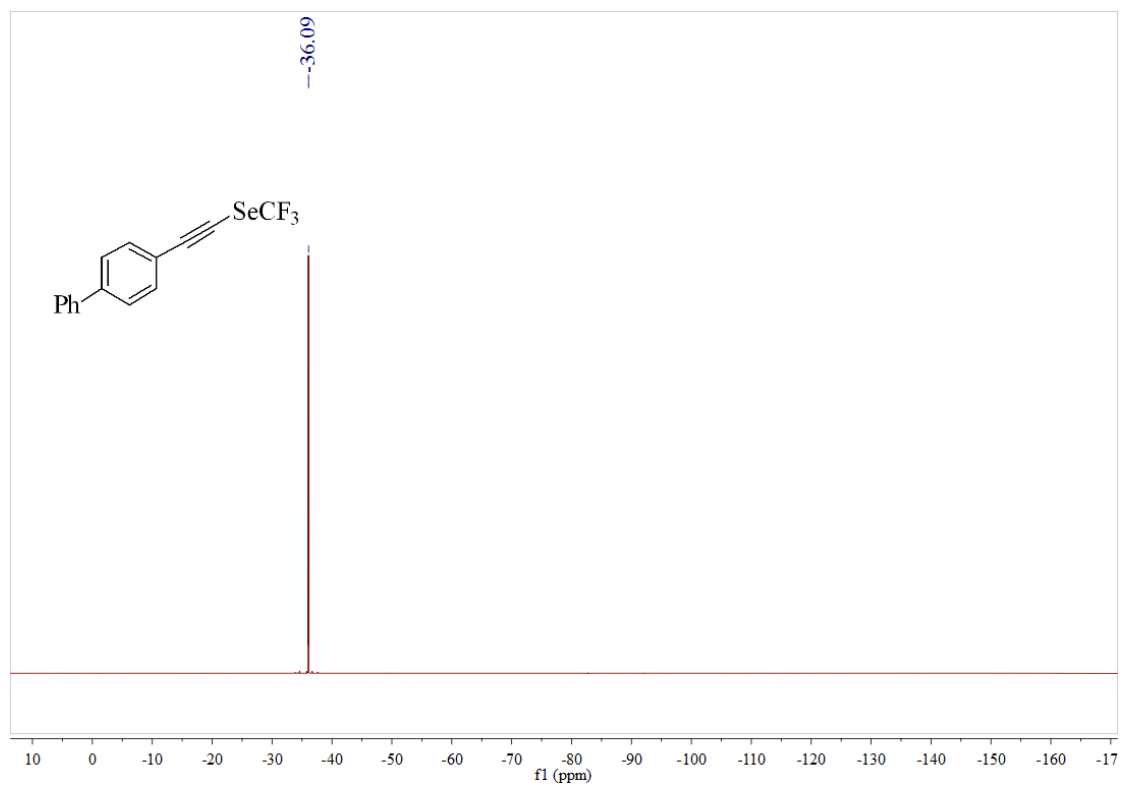

$^1\text{H}$  NMR spectrum of **3i** in  $\text{CDCl}_3$

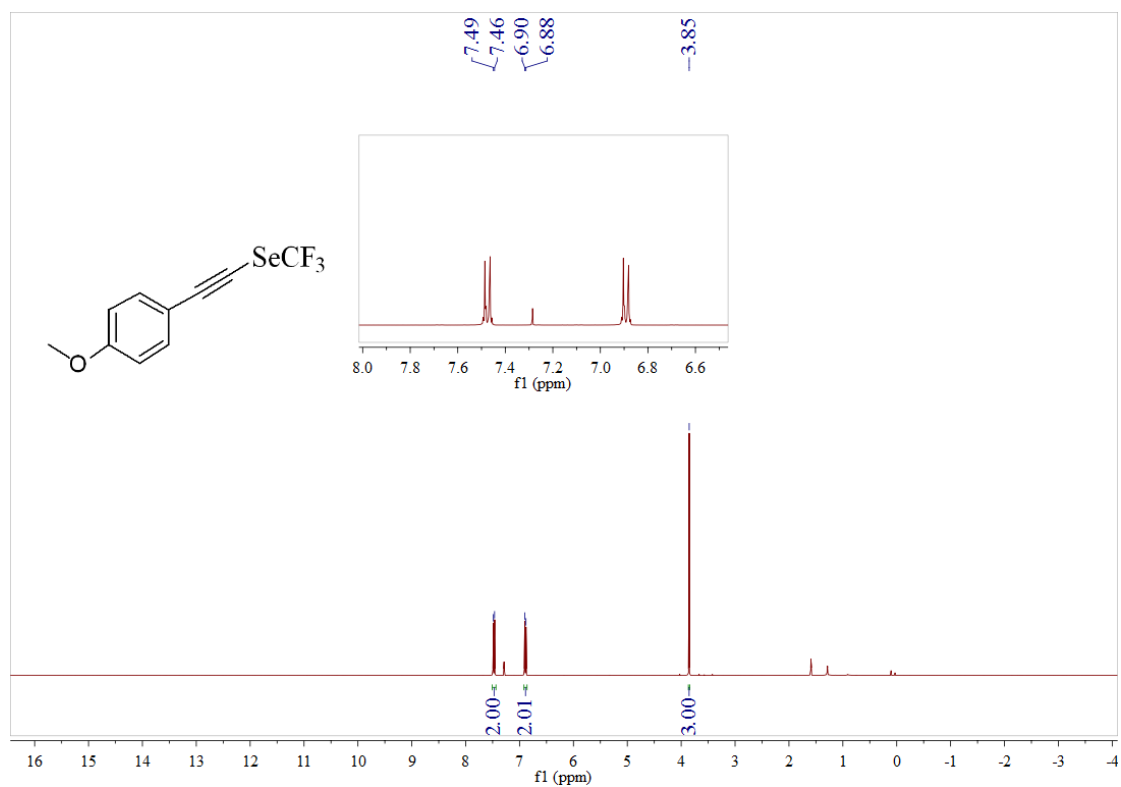

$^{13}\text{C}$  NMR spectrum of **3i** in  $\text{CDCl}_3$

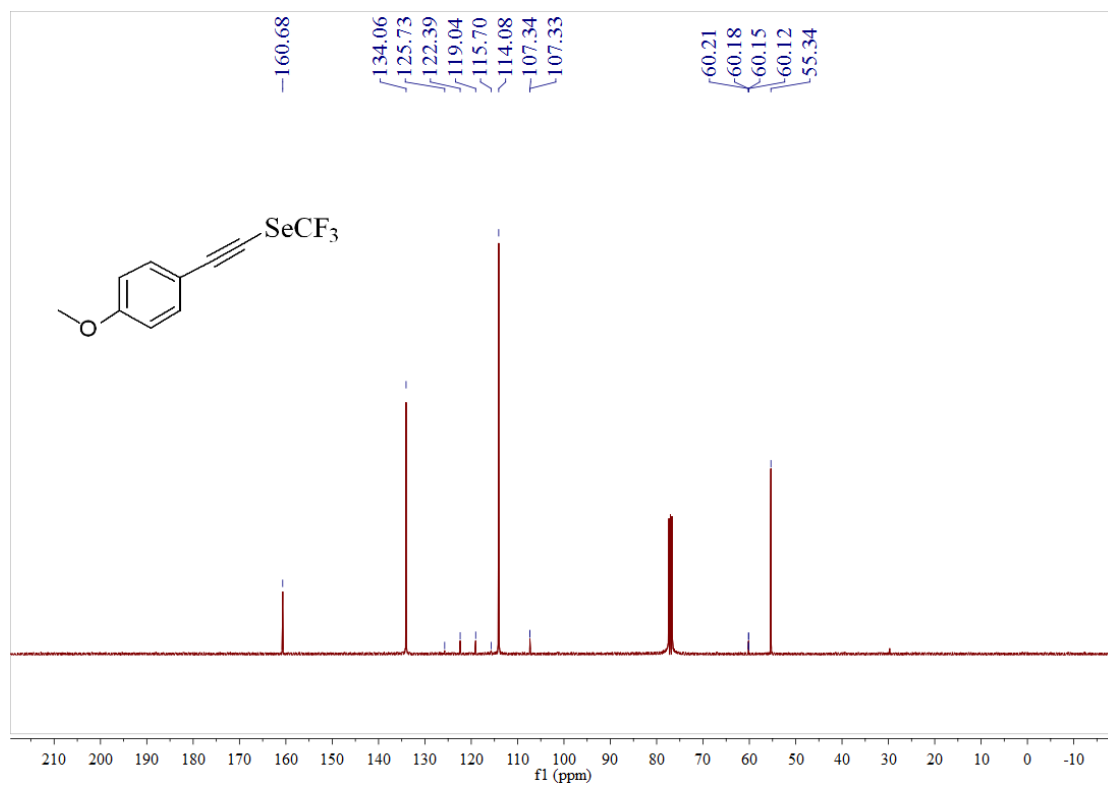

$^{19}\text{F}$  NMR spectrum of **3i** in  $\text{CDCl}_3$

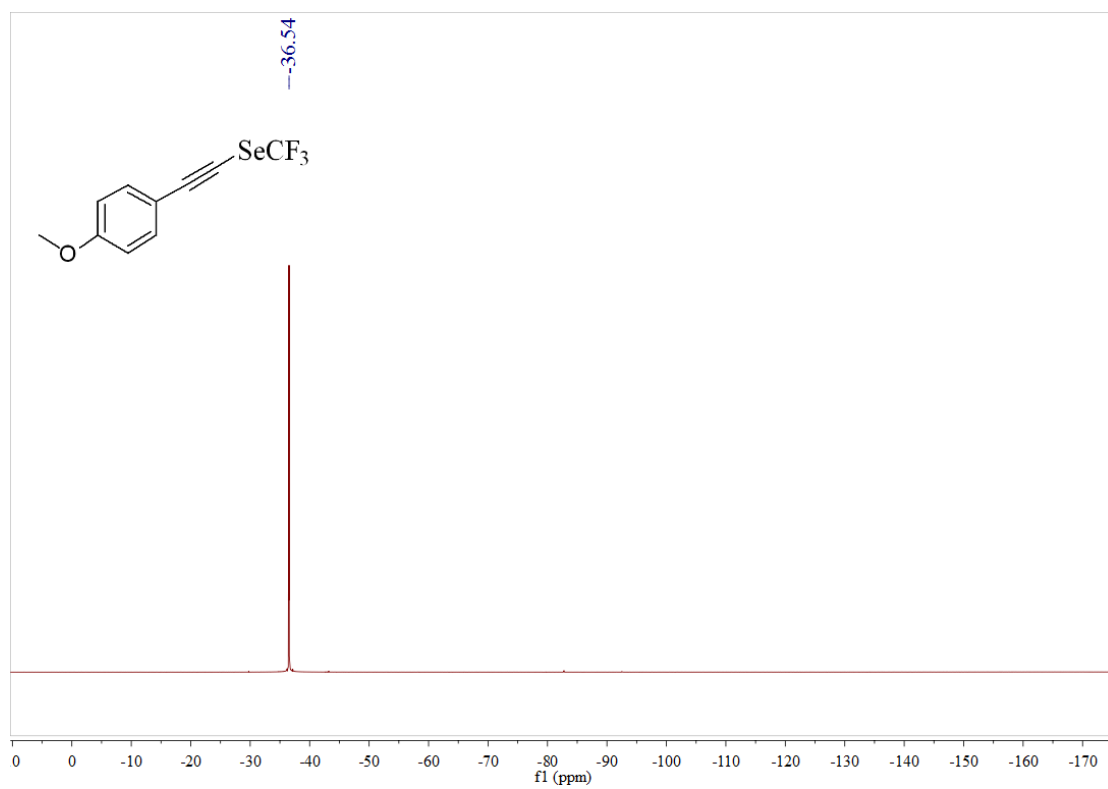

$^1\text{H}$  NMR spectrum of **3j** in  $\text{CDCl}_3$

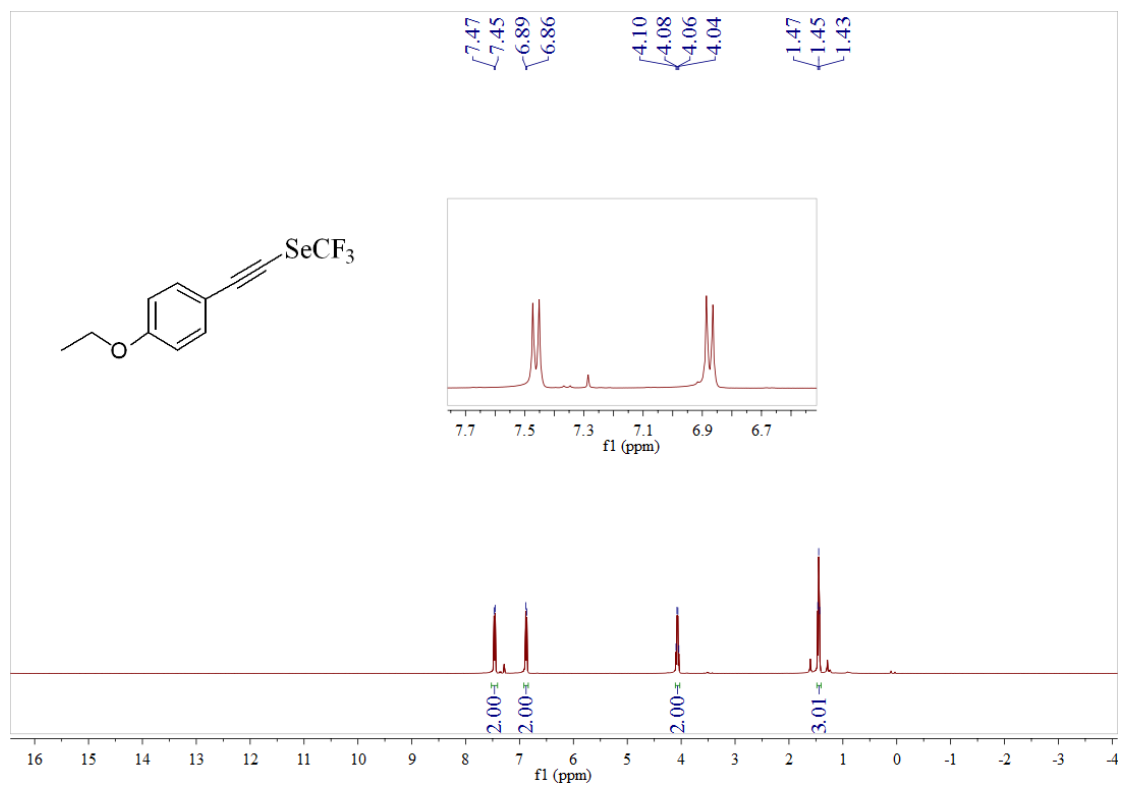

<sup>13</sup>C NMR spectrum of **3j** in CDCl<sub>3</sub>

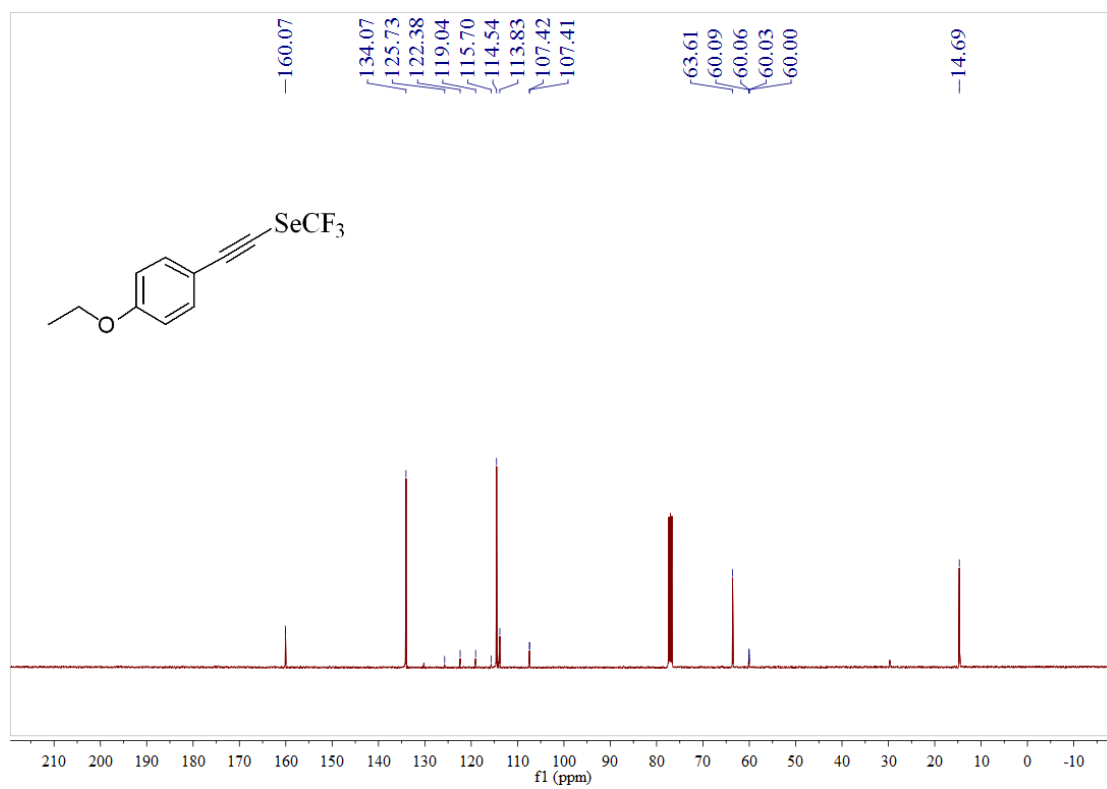

<sup>19</sup>F NMR spectrum of **3j** in CDCl<sub>3</sub>

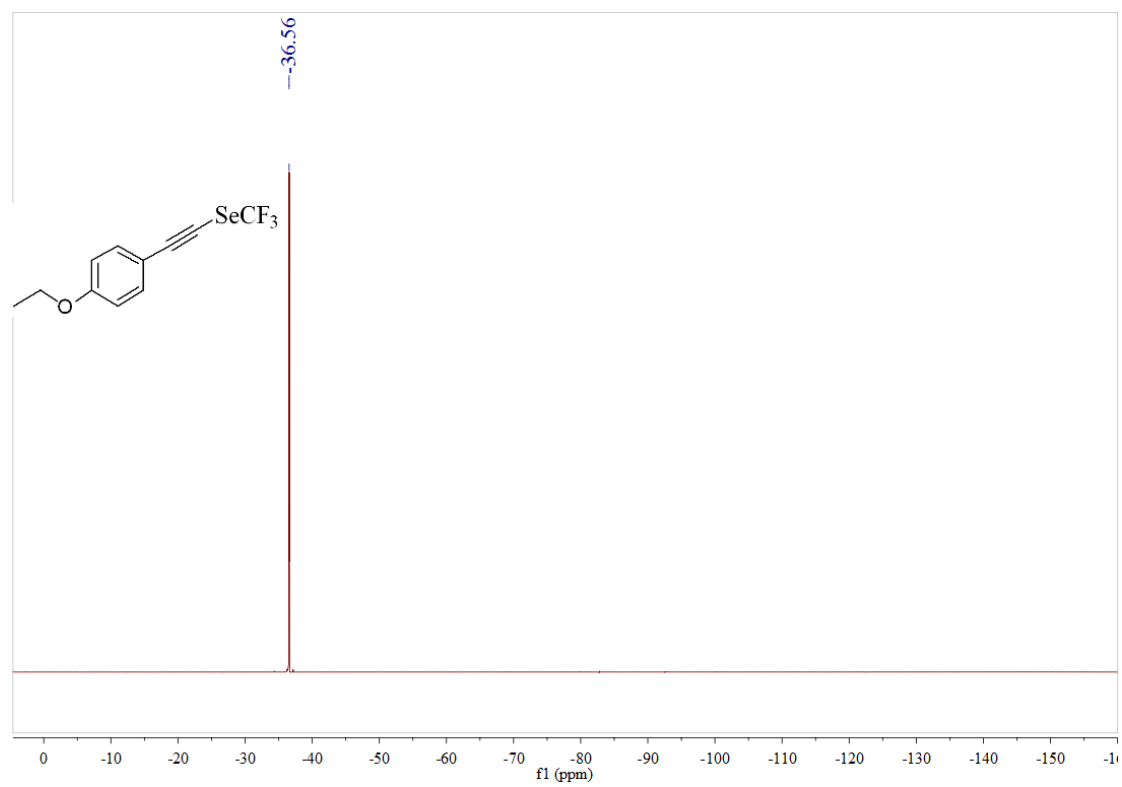





<sup>19</sup>F NMR spectrum of **3k** in CDCl<sub>3</sub>

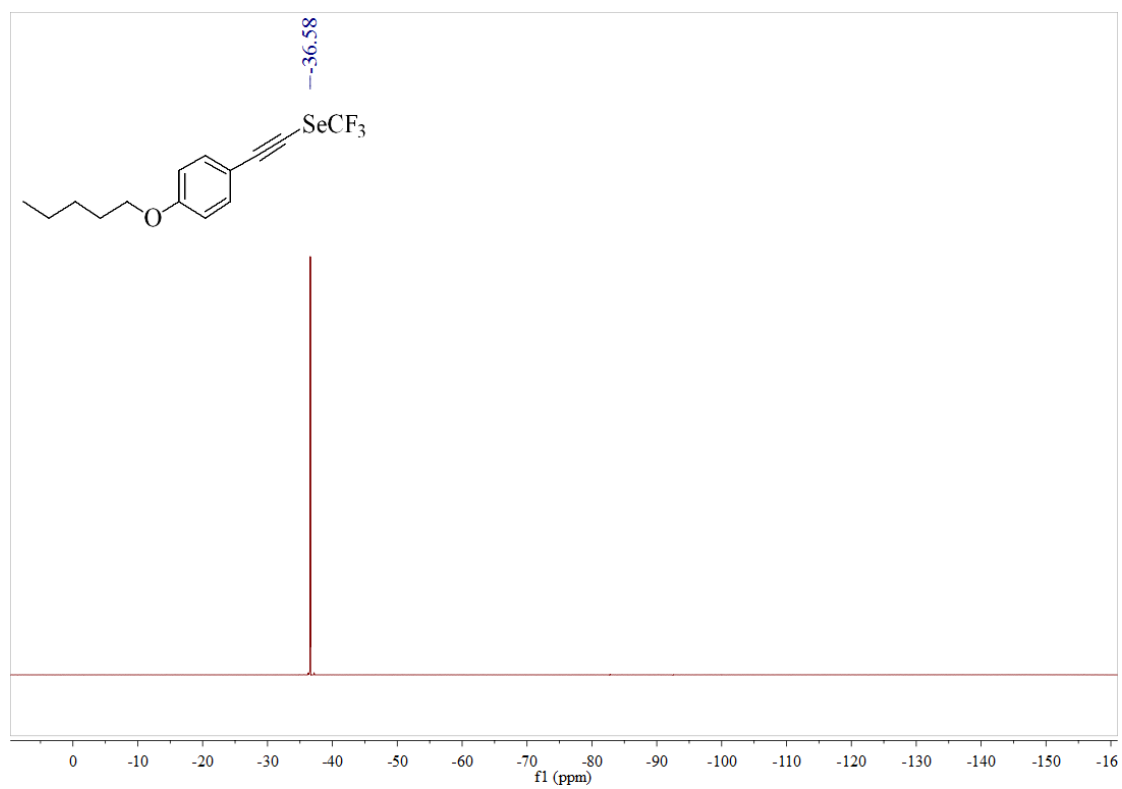

<sup>1</sup>H NMR spectrum of **3l** in CDCl<sub>3</sub>

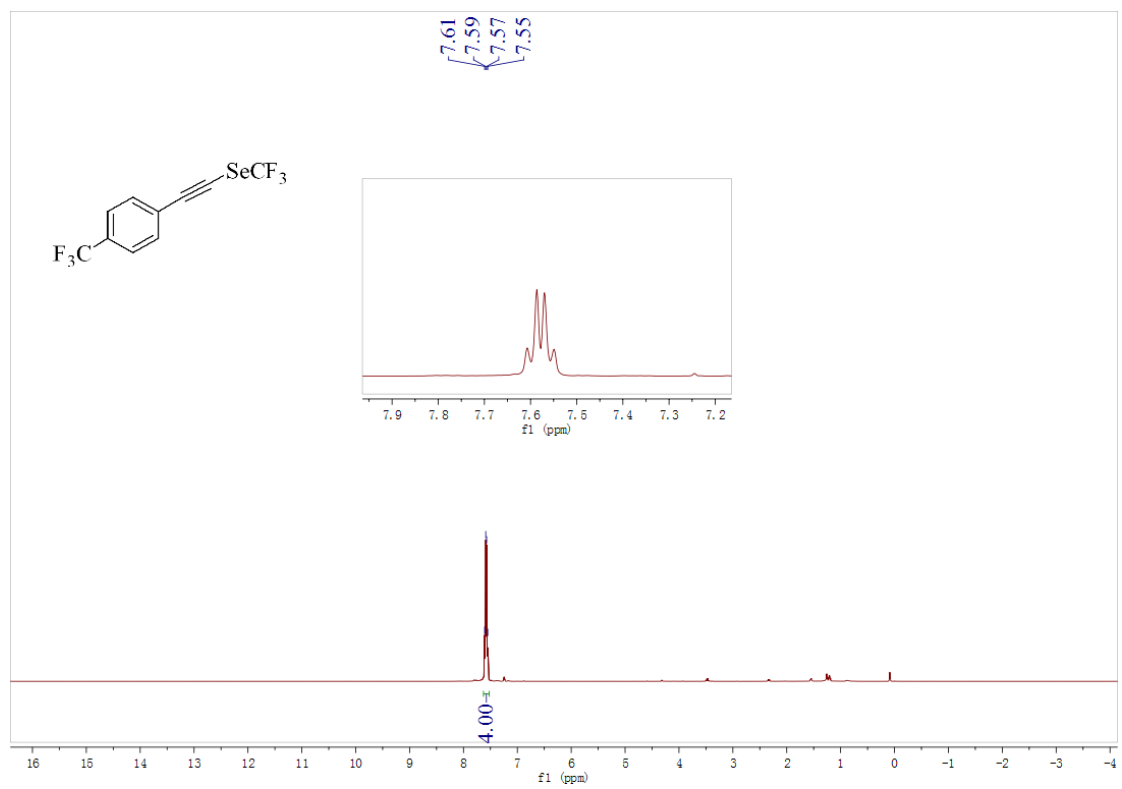

<sup>13</sup>C NMR spectrum of **31** in CDCl<sub>3</sub>

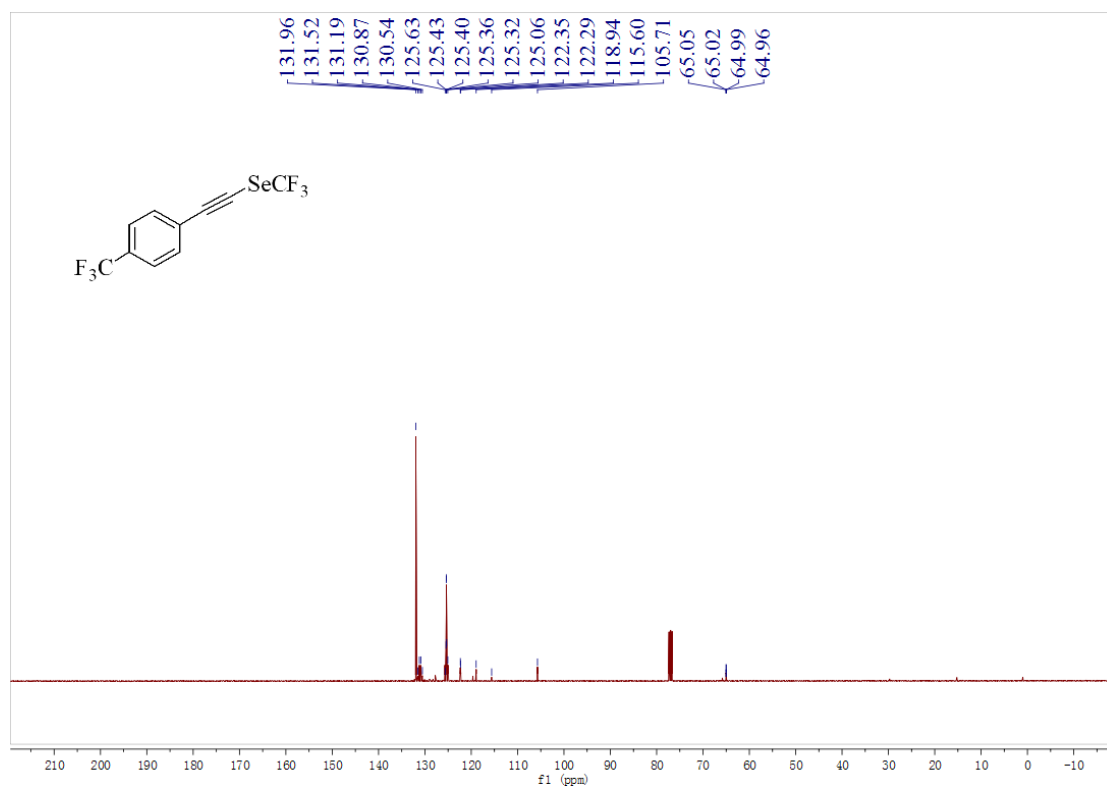

<sup>19</sup>F NMR spectrum of **31** in CDCl<sub>3</sub>

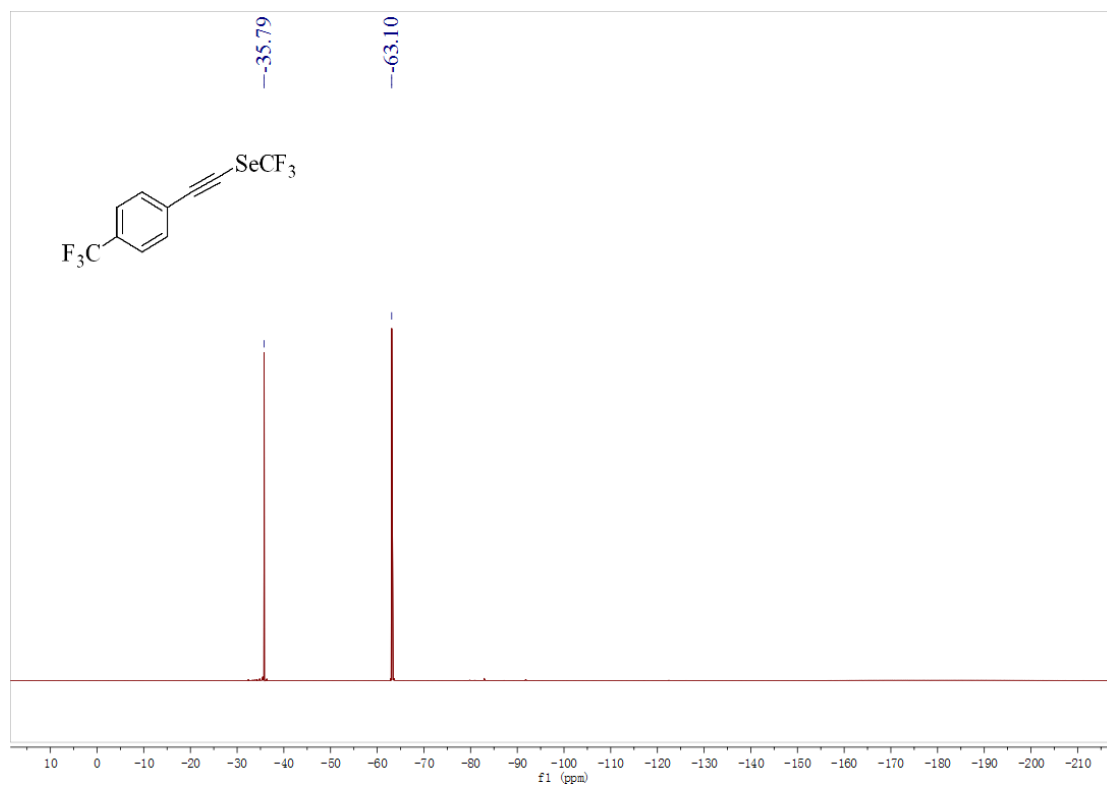

<sup>1</sup>H NMR spectrum of **3m** in CDCl<sub>3</sub>

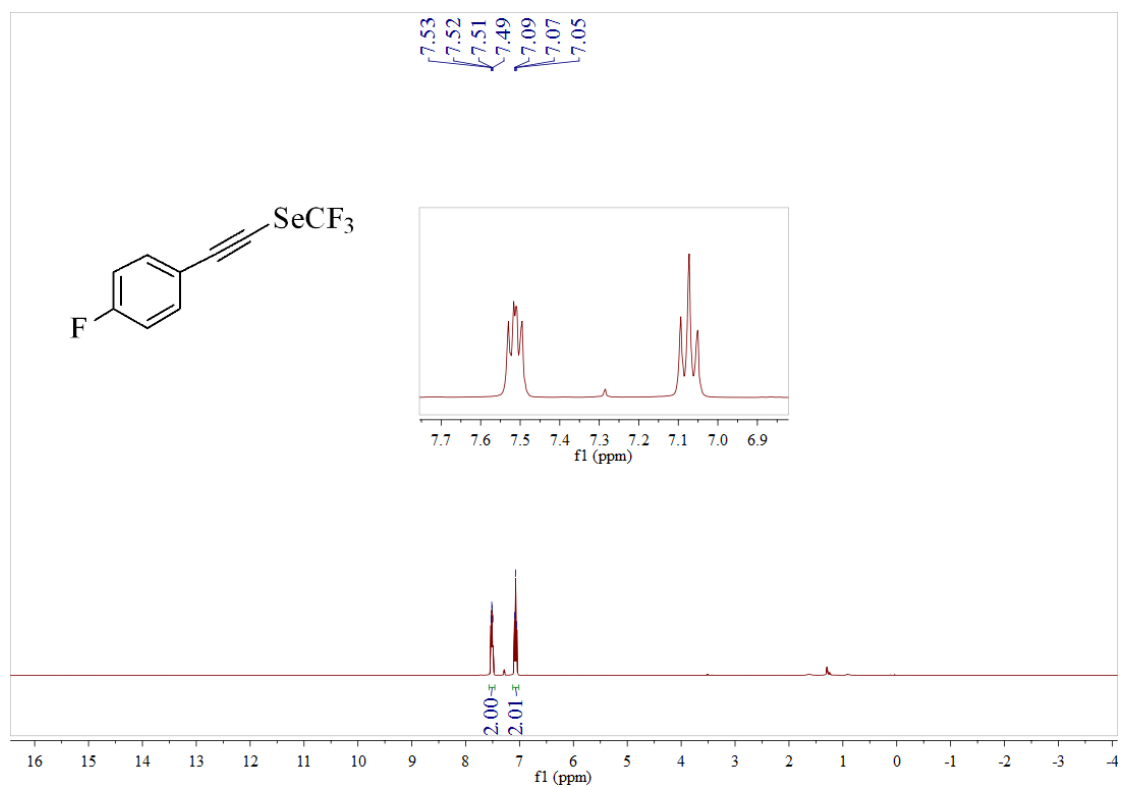

<sup>13</sup>C NMR spectrum of **3m** in CDCl<sub>3</sub>

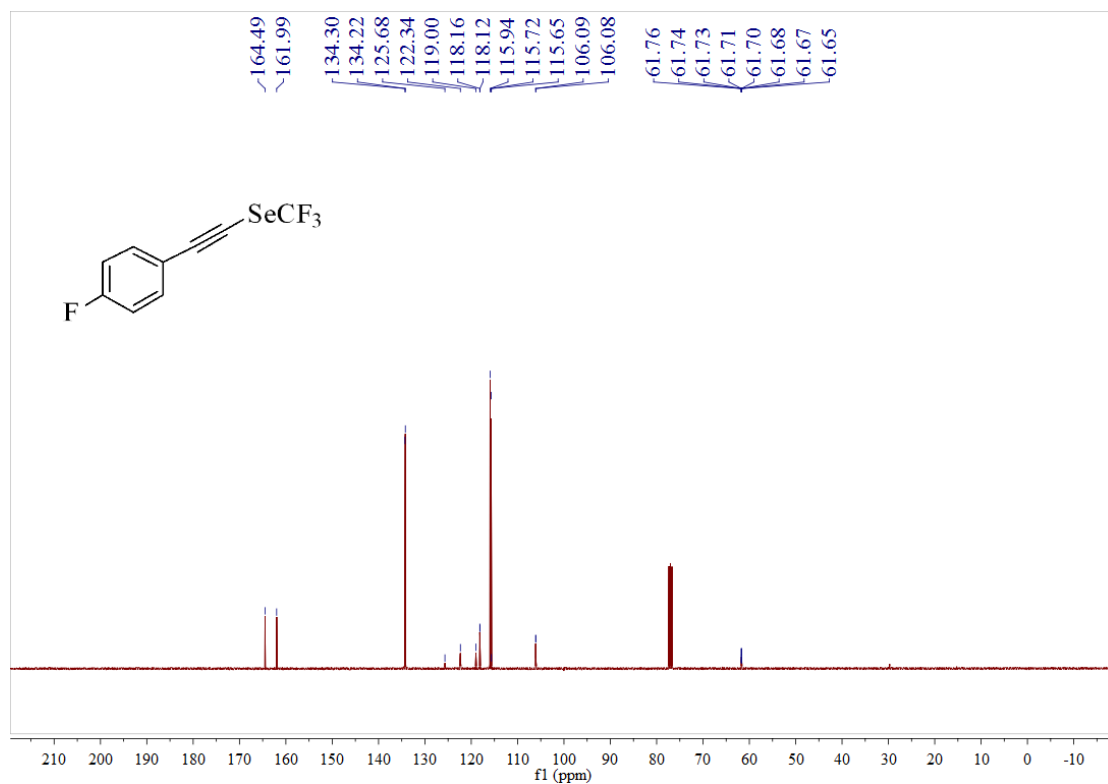

<sup>19</sup>F NMR spectrum of **3m** in CDCl<sub>3</sub>

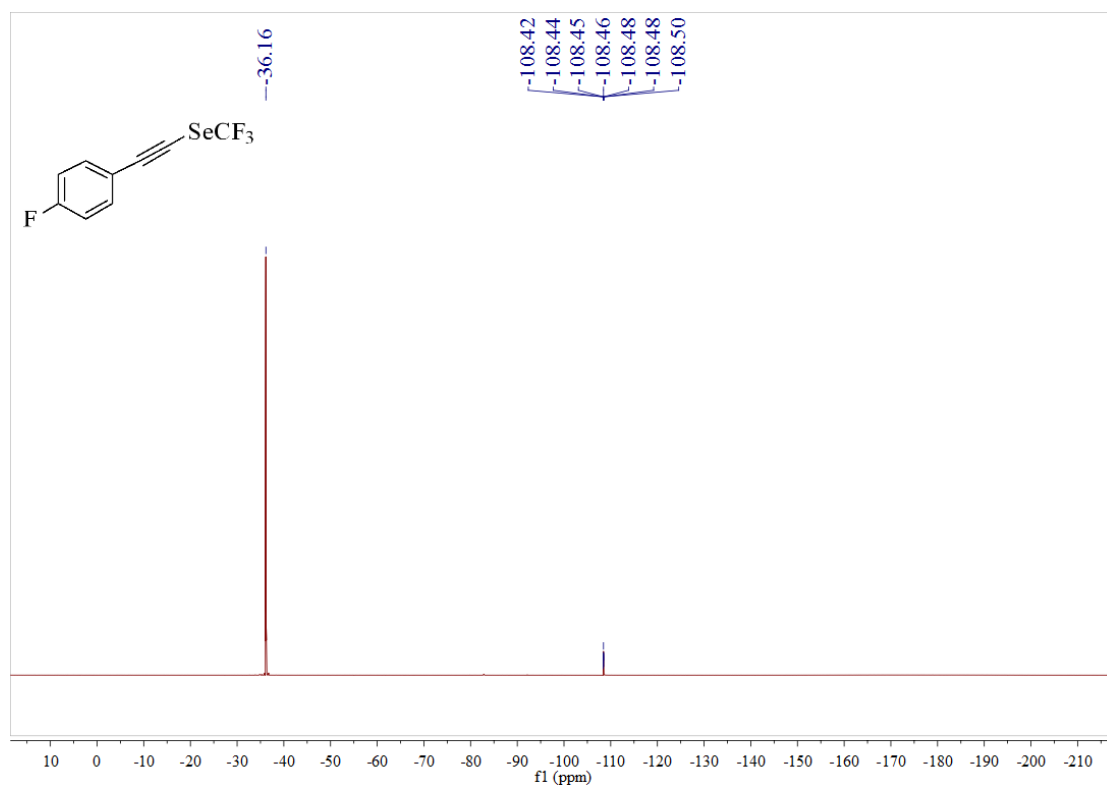

<sup>1</sup>H NMR spectrum of **3n** in CDCl<sub>3</sub>

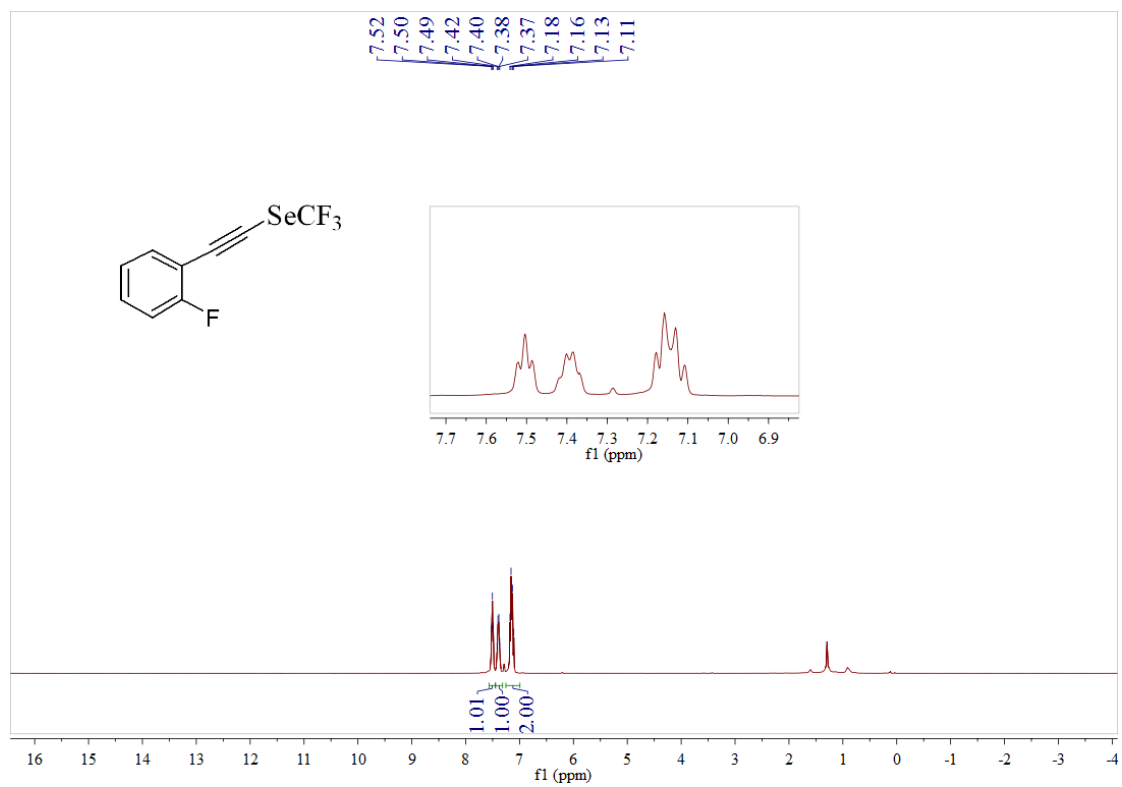

<sup>13</sup>C NMR spectrum of **3n** in CDCl<sub>3</sub>

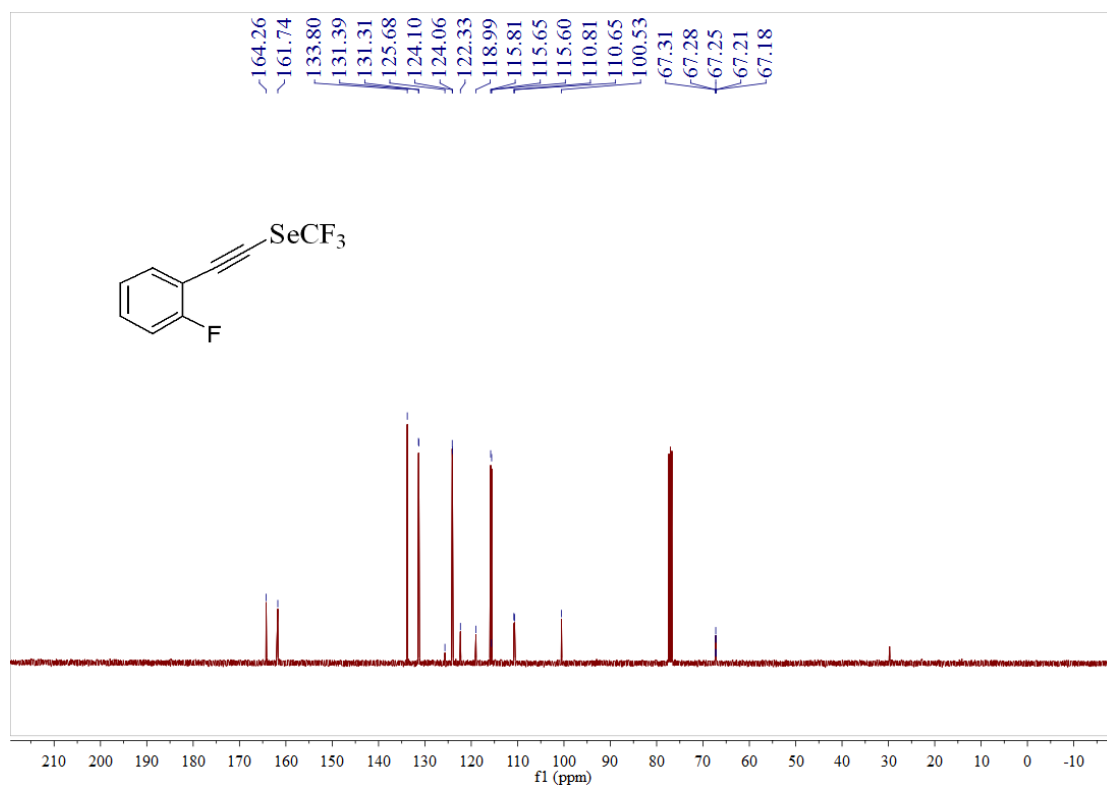

<sup>19</sup>F NMR spectrum of **3n** in CDCl<sub>3</sub>

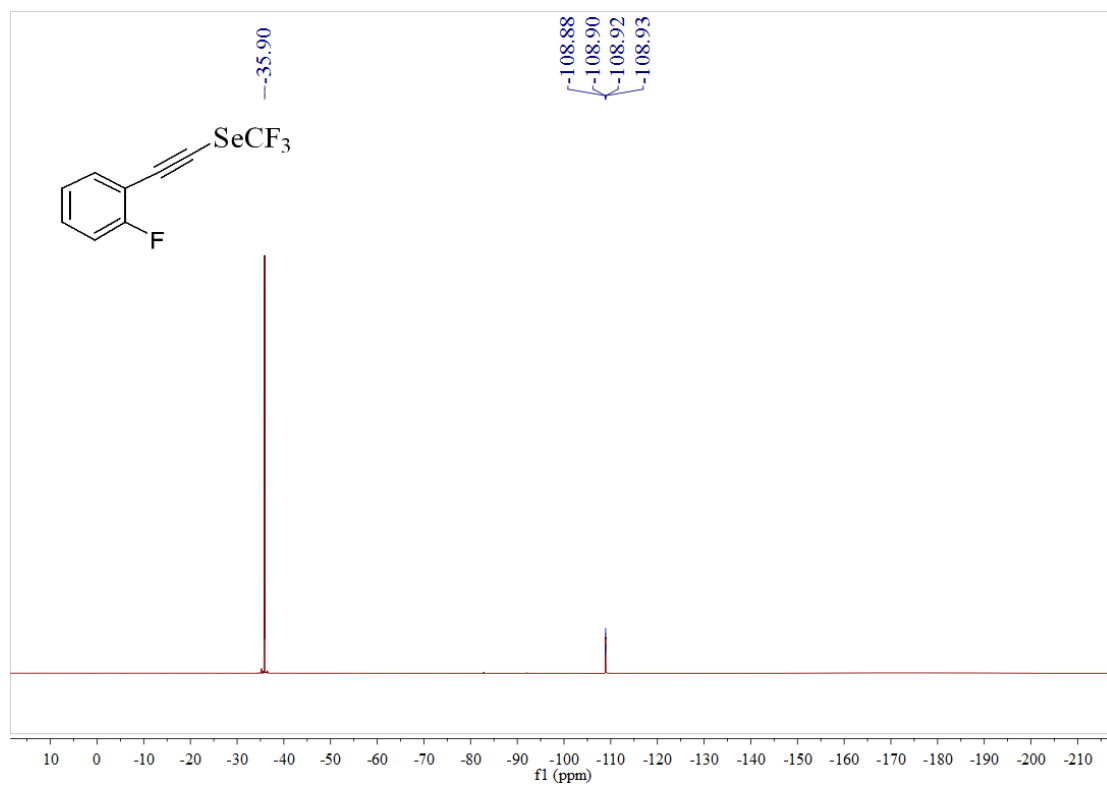

$^1\text{H}$  NMR spectrum of **3o** in  $\text{CDCl}_3$

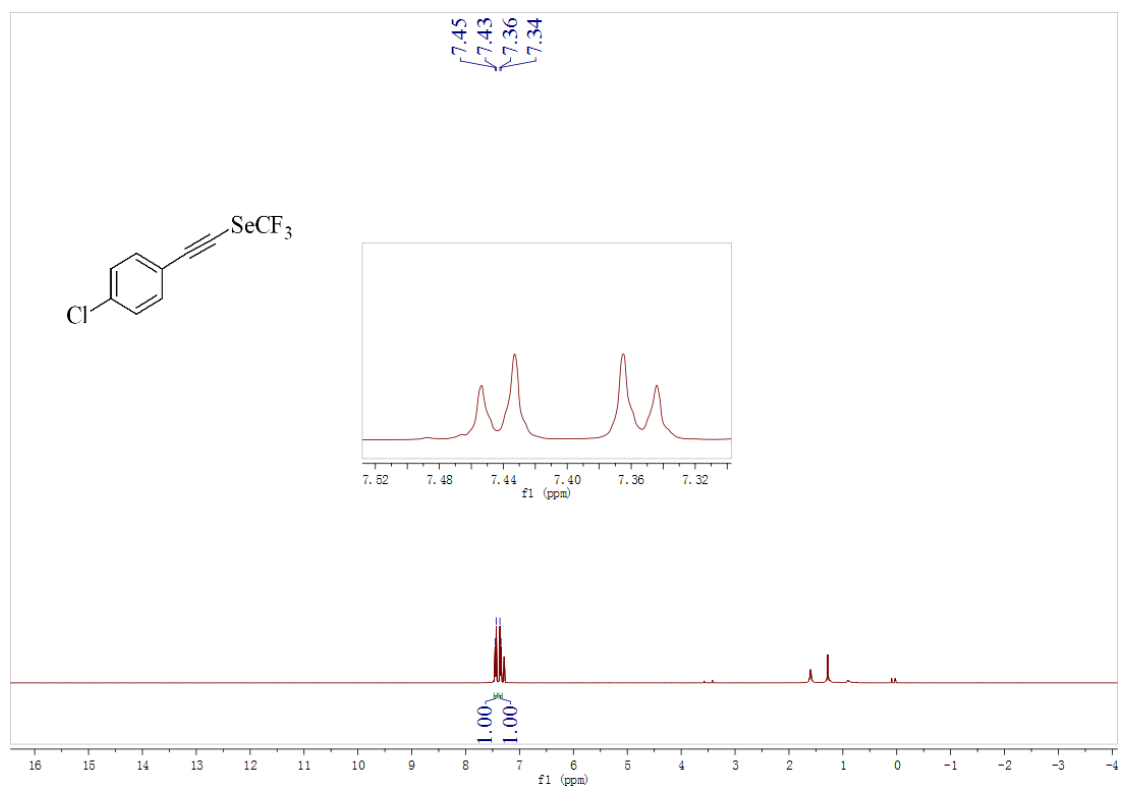

$^{13}\text{C}$  NMR spectrum of **3o** in  $\text{CDCl}_3$

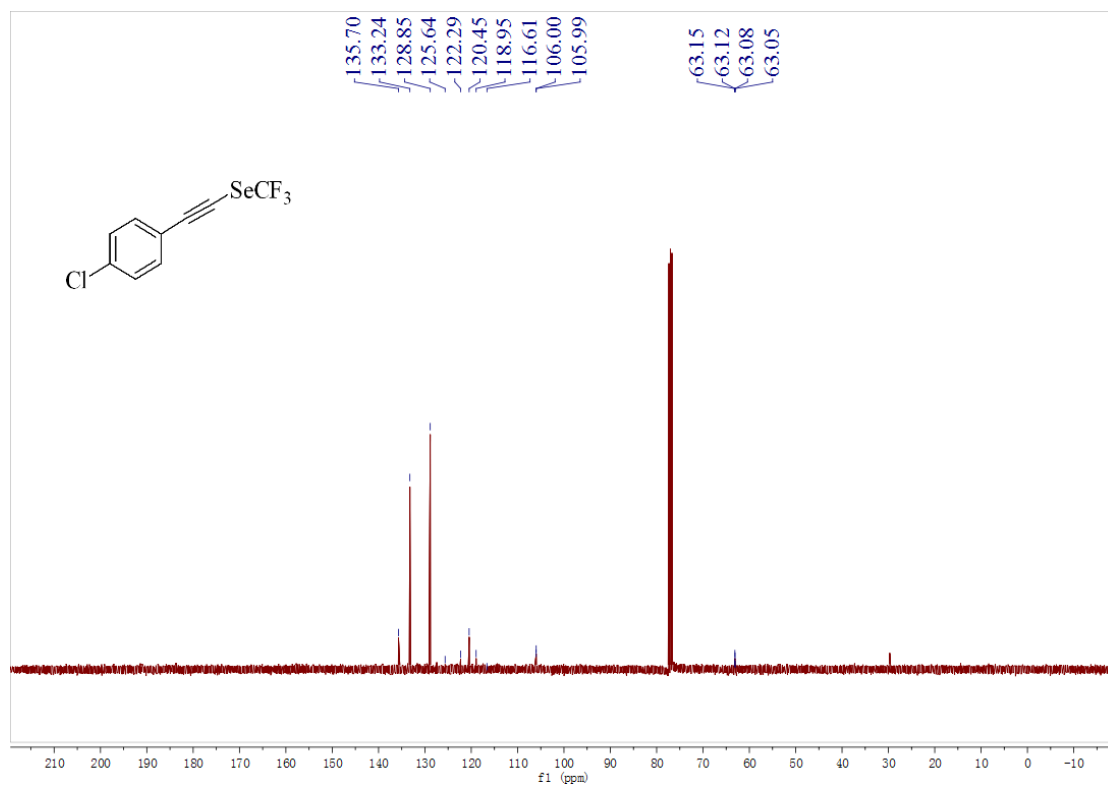

**<sup>19</sup>F NMR spectrum of 3o in CDCl<sub>3</sub>**

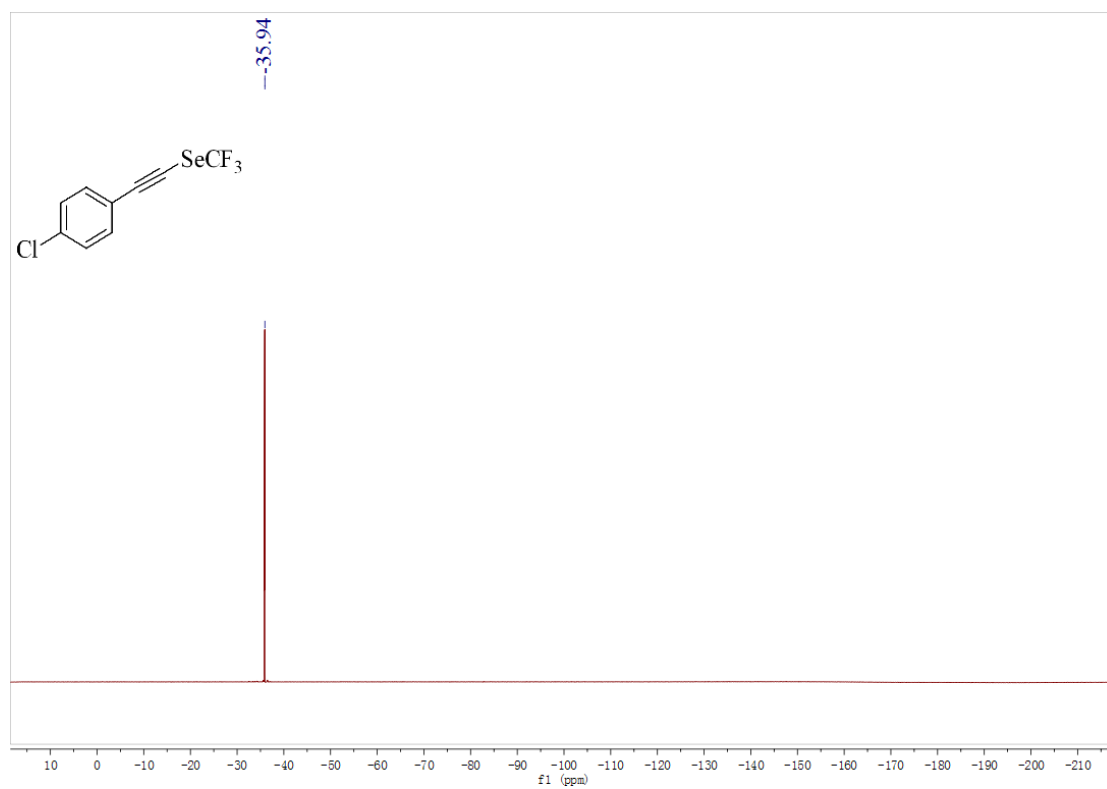

**<sup>1</sup>H NMR spectrum of 3p in CDCl<sub>3</sub>**

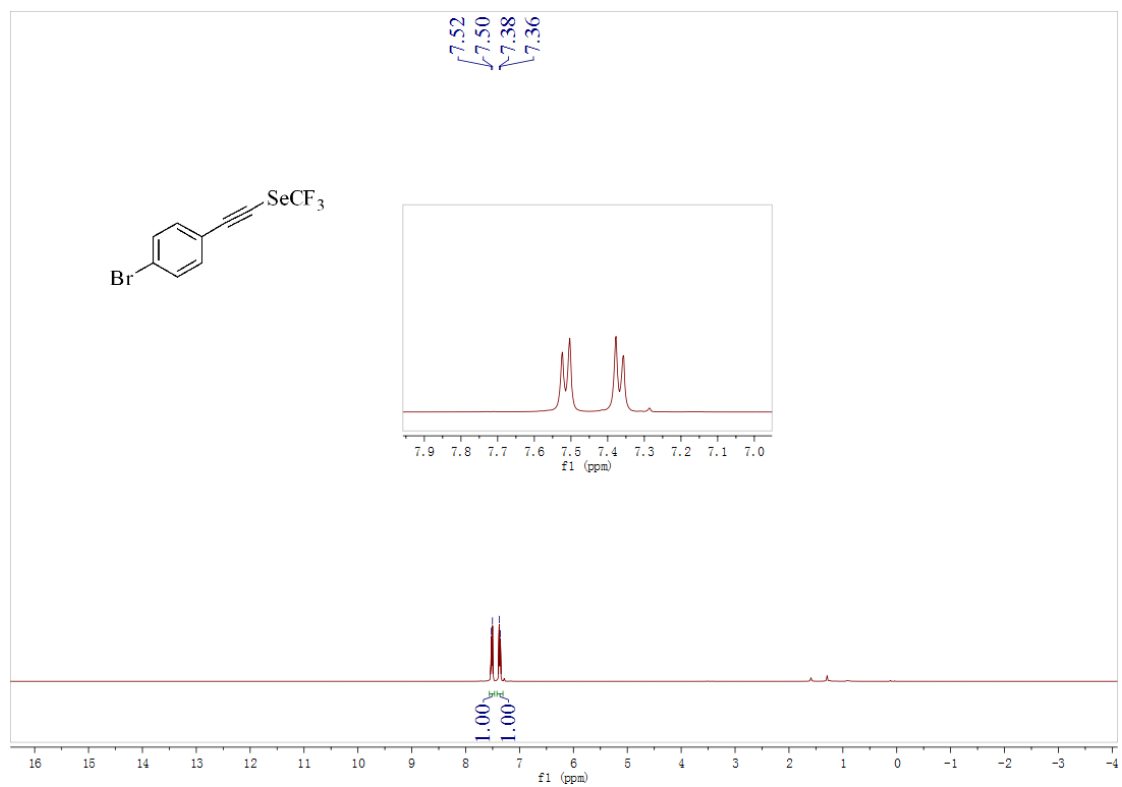



<sup>13</sup>C NMR spectrum of **3p** in CDCl<sub>3</sub>

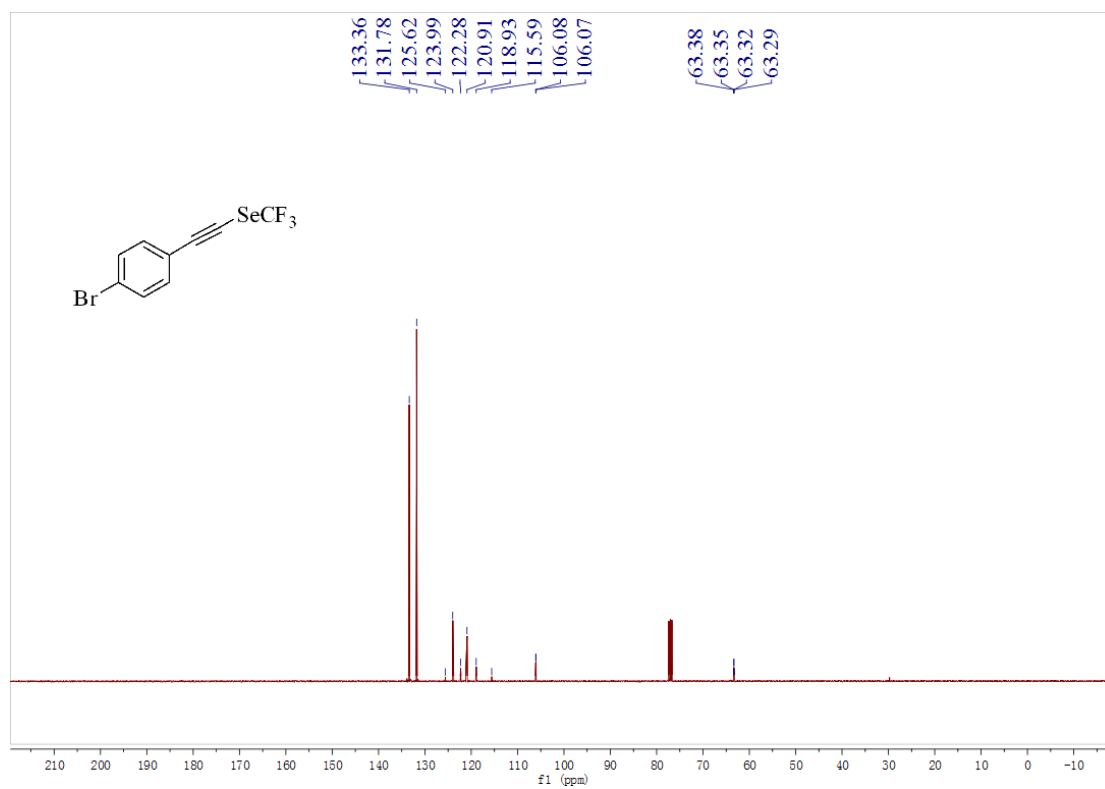

<sup>19</sup>F NMR spectrum of **3p** in CDCl<sub>3</sub>

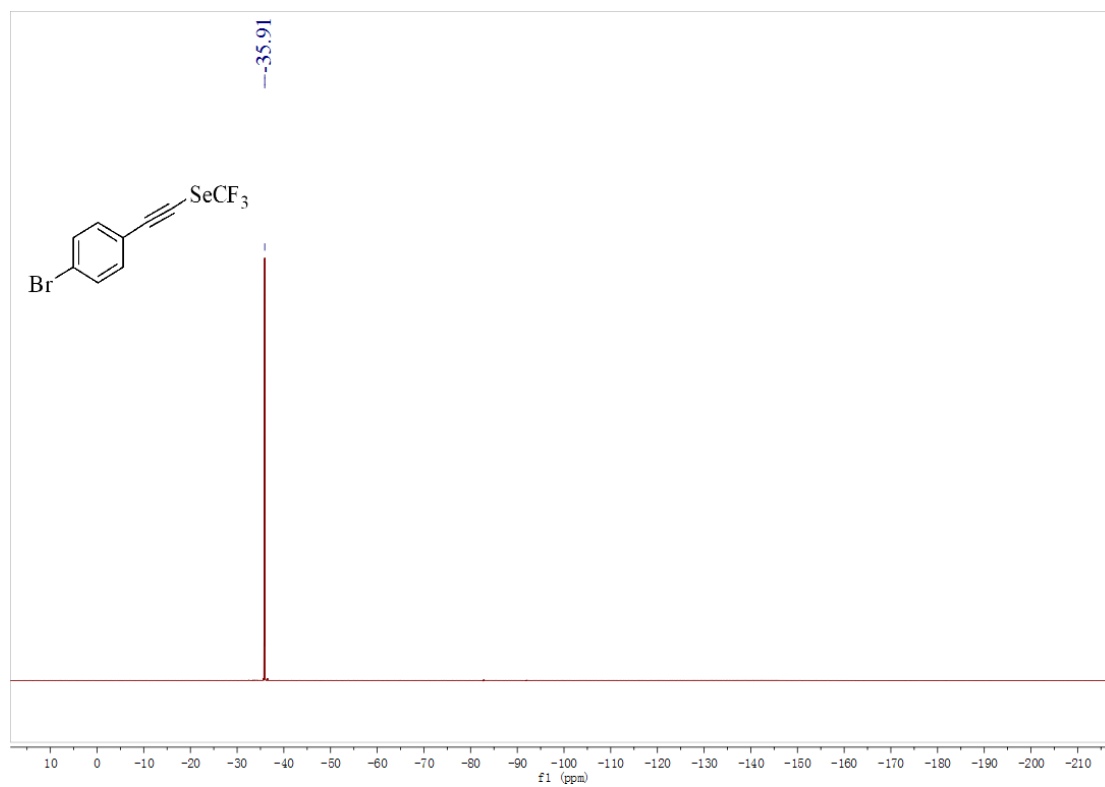

$^1\text{H}$  NMR spectrum of **3q** in  $\text{CDCl}_3$

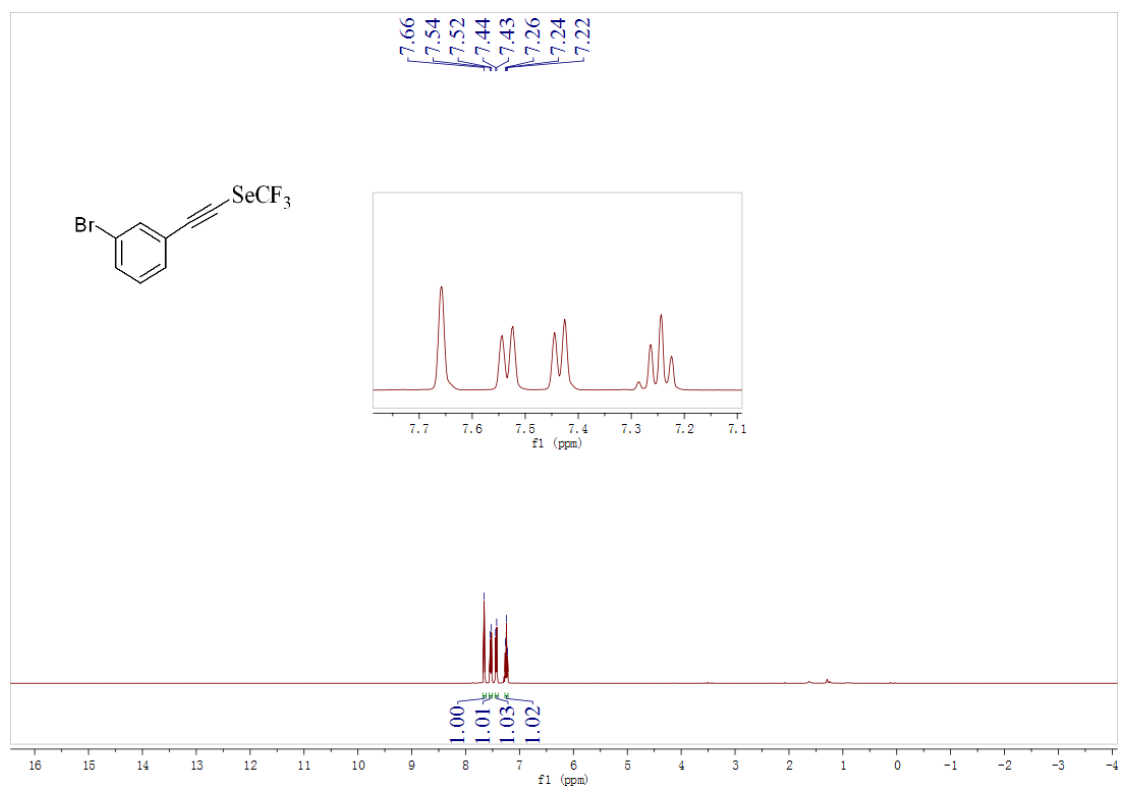

$^{13}\text{C}$  NMR spectrum of **3q** in  $\text{CDCl}_3$

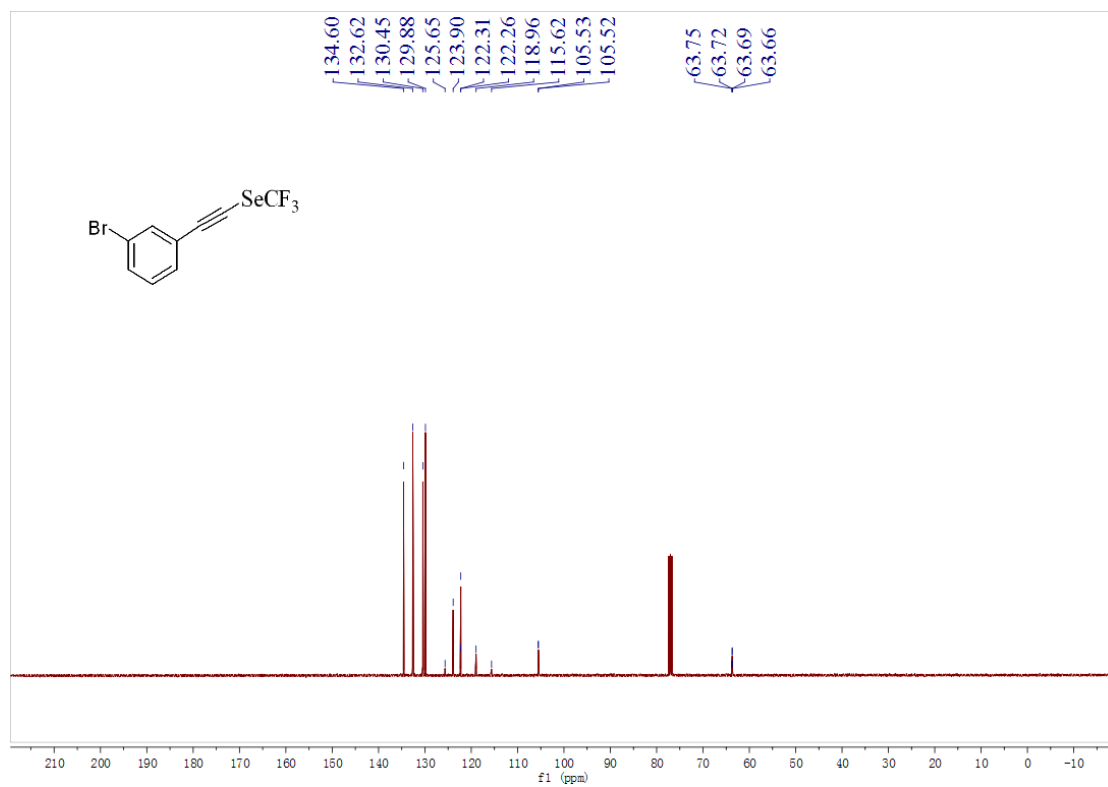

<sup>19</sup>F NMR spectrum of **3q** in CDCl<sub>3</sub>

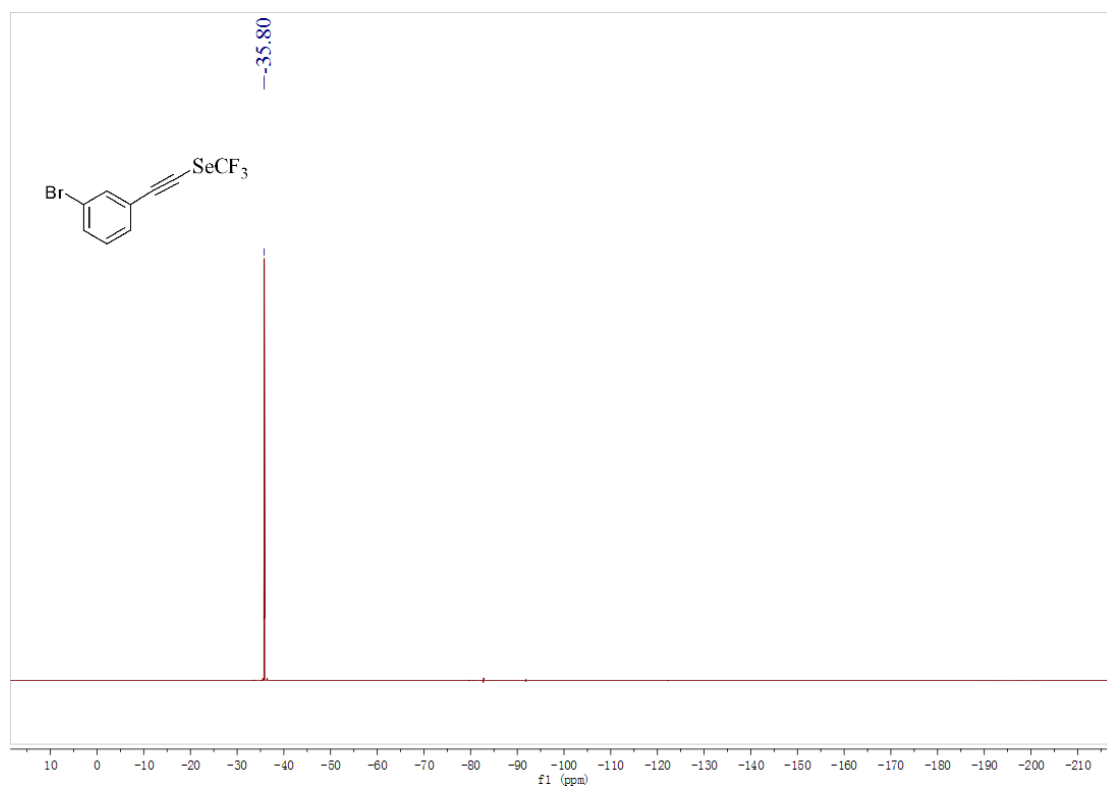

<sup>1</sup>H NMR spectrum of **3r** in CDCl<sub>3</sub>

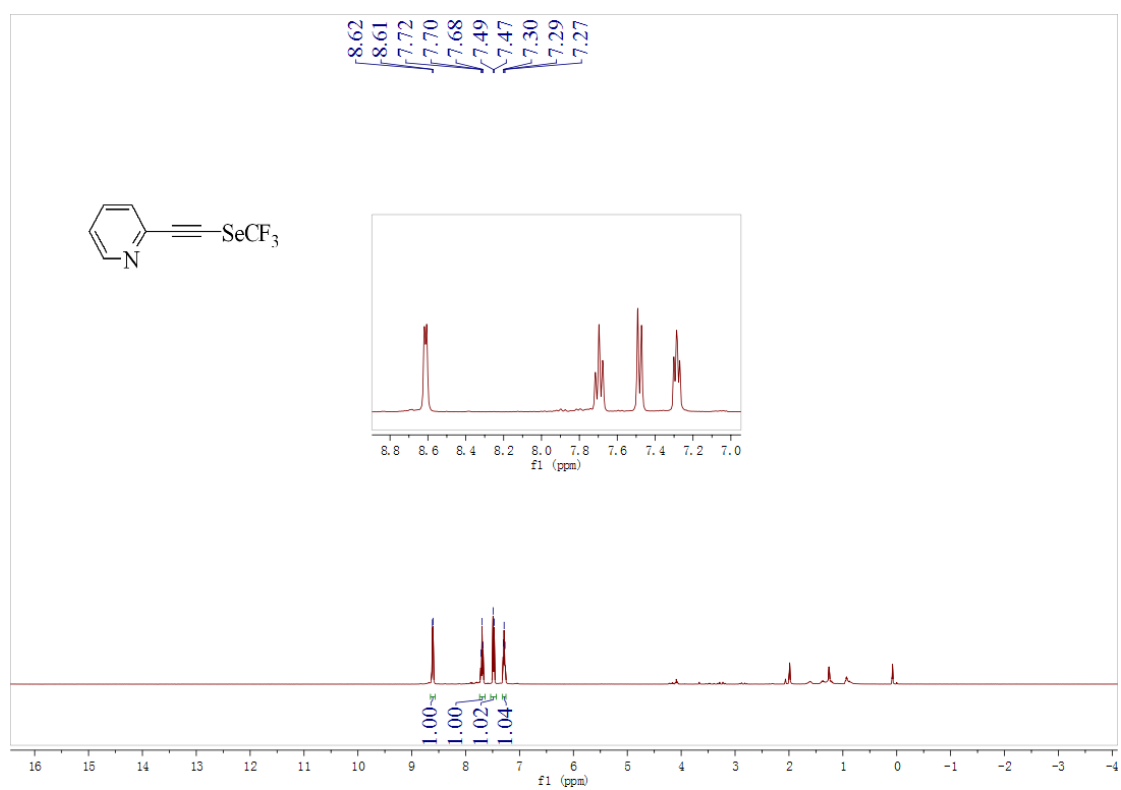

<sup>13</sup>C NMR spectrum of **3r** in CDCl<sub>3</sub>

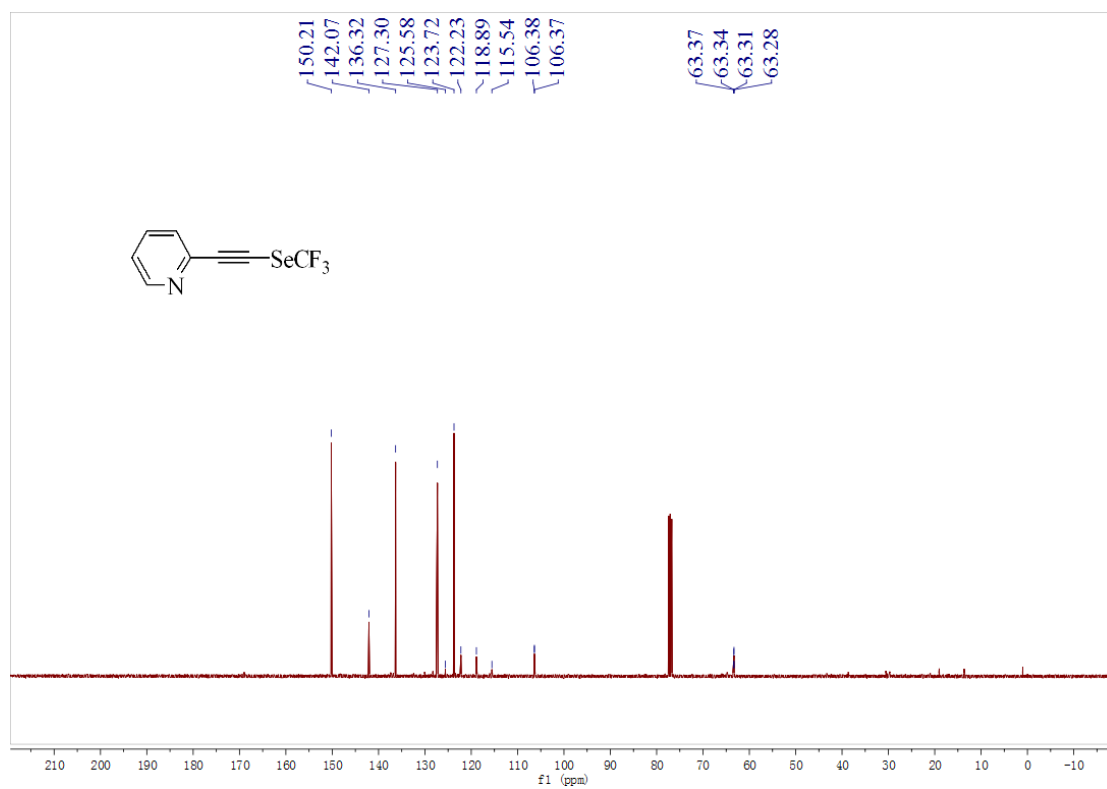

<sup>19</sup>F NMR spectrum of **3r** in CDCl<sub>3</sub>

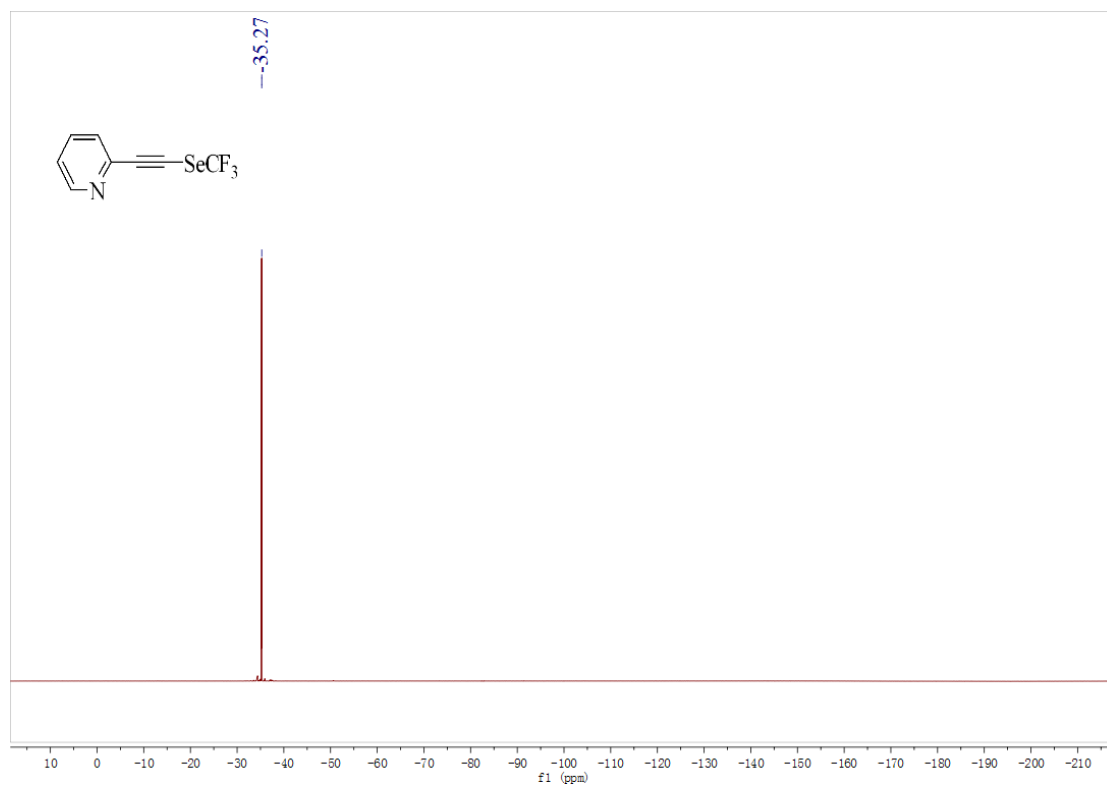

$^1\text{H}$  NMR spectrum of **3s** in  $\text{CDCl}_3$

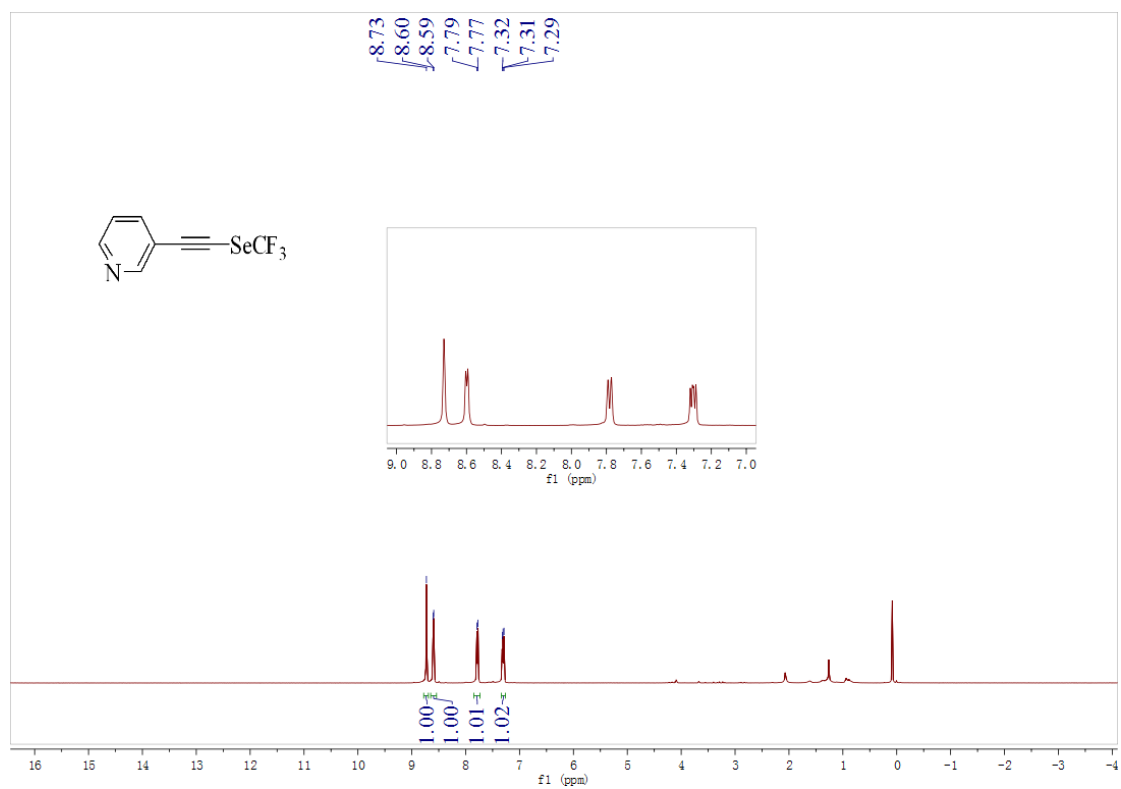

$^{13}\text{C}$  NMR spectrum of **3s** in  $\text{CDCl}_3$

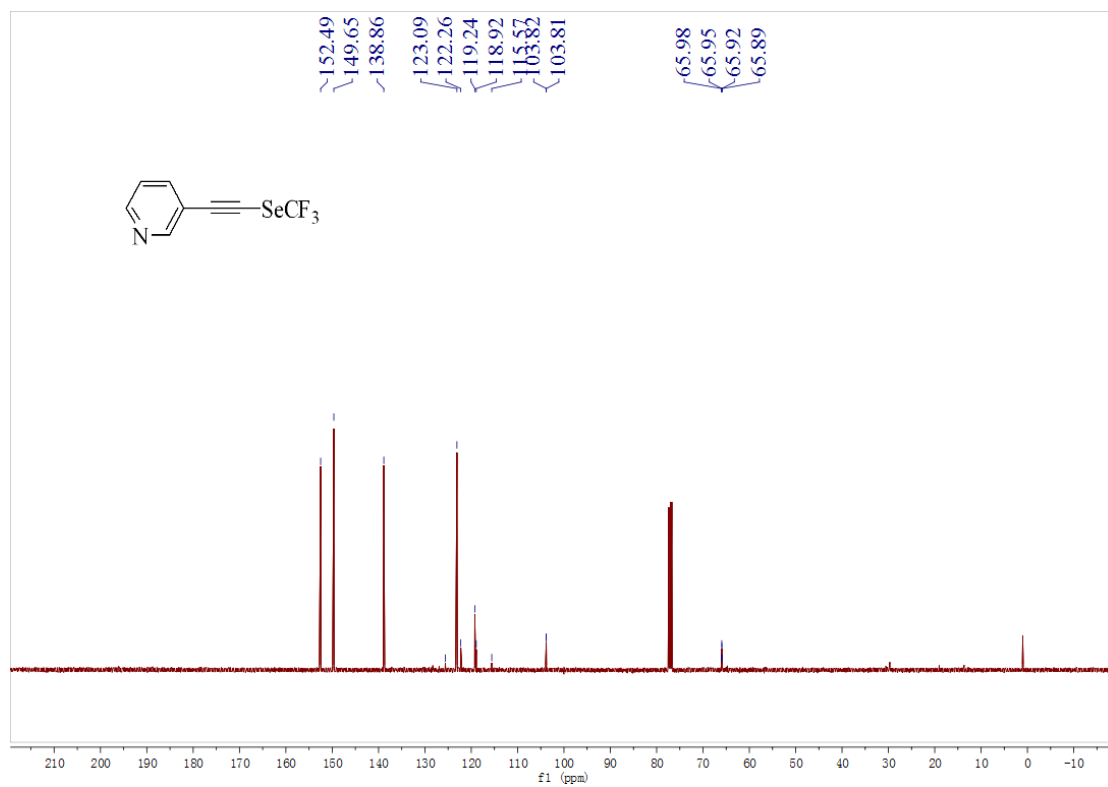

$^{19}\text{F}$  NMR spectrum of **3s** in  $\text{CDCl}_3$

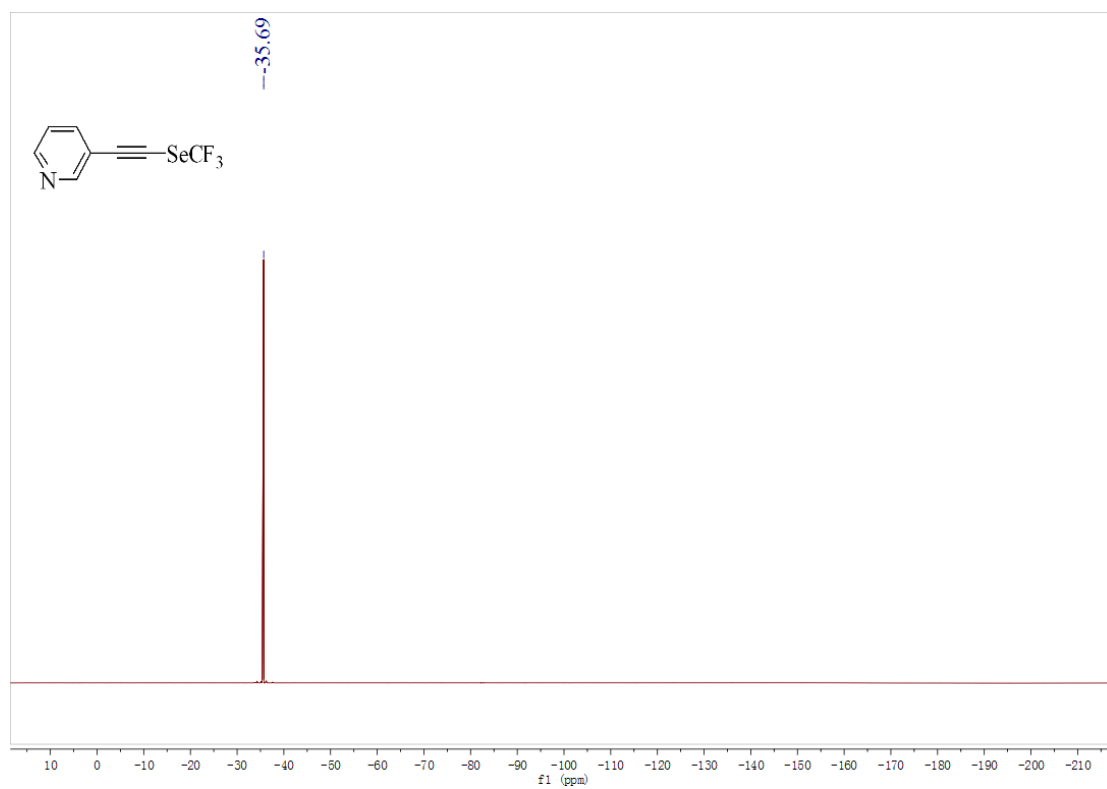

$^1\text{H}$  NMR spectrum of **3t** in  $\text{CDCl}_3$

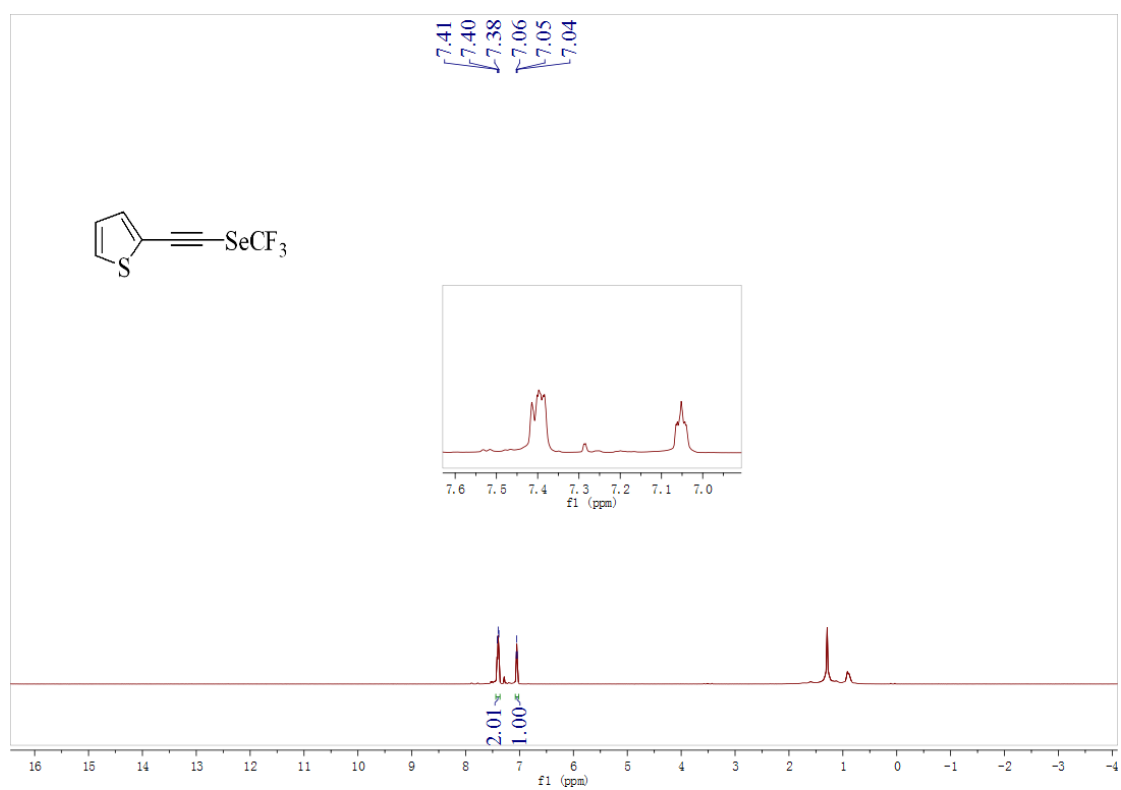

<sup>13</sup>C NMR spectrum of **3t** in CDCl<sub>3</sub>

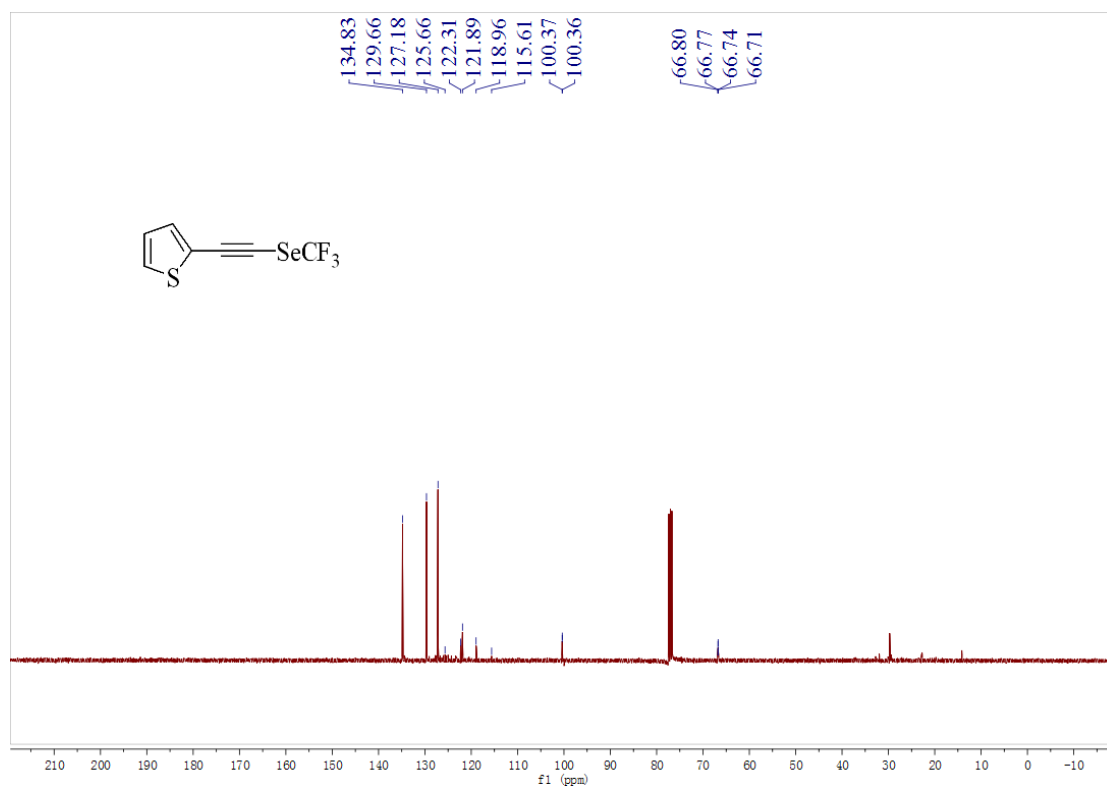

<sup>19</sup>F NMR spectrum of **3t** in CDCl<sub>3</sub>

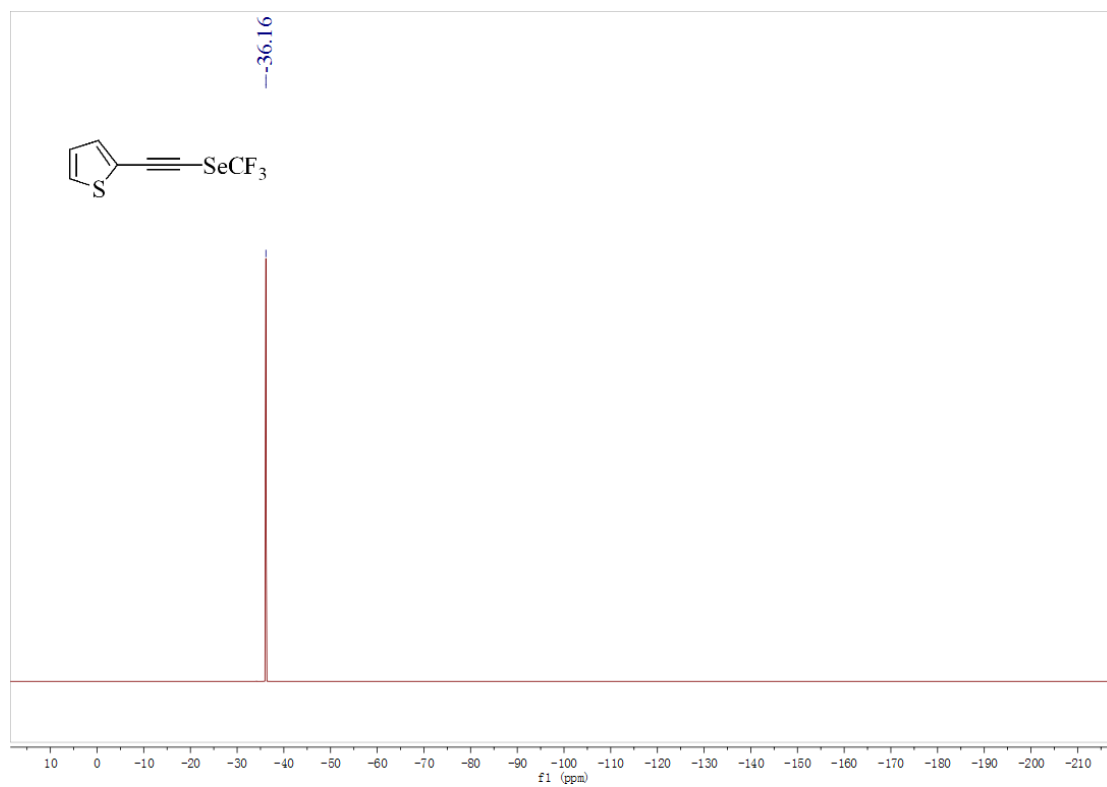

$^1\text{H}$  NMR spectrum of **3u** in  $\text{CDCl}_3$

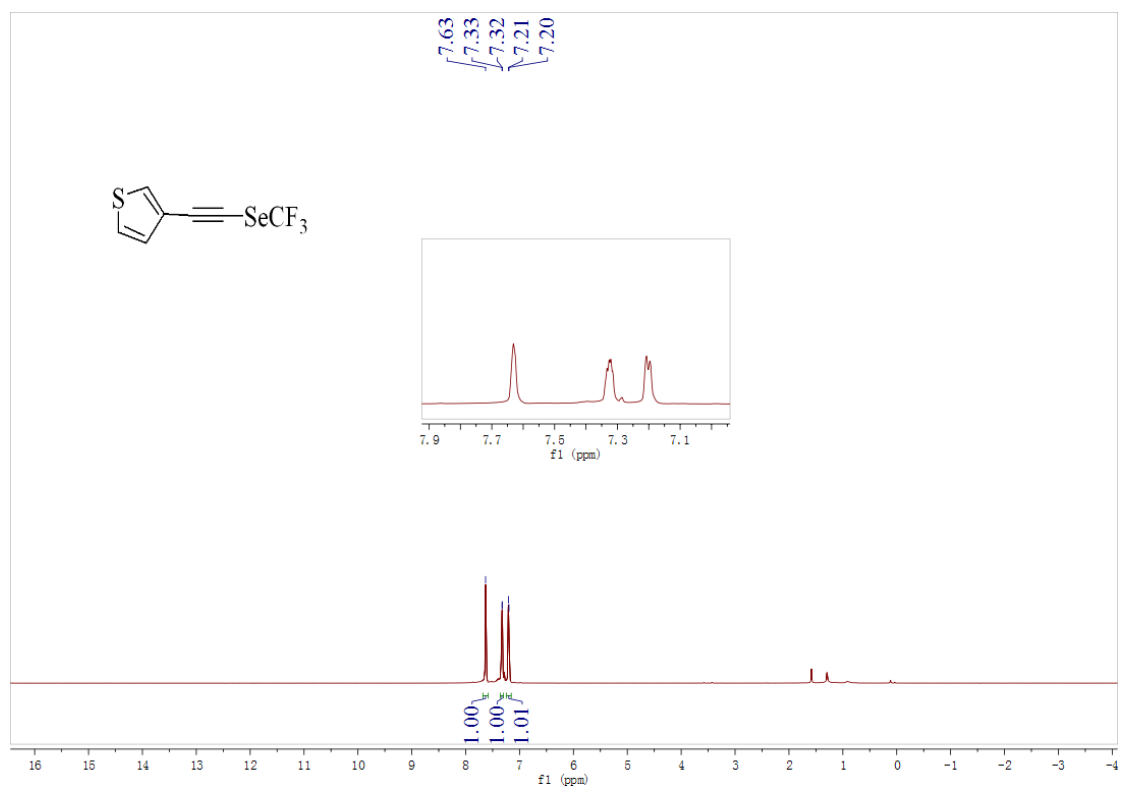

$^{13}\text{C}$  NMR spectrum of **3u** in  $\text{CDCl}_3$

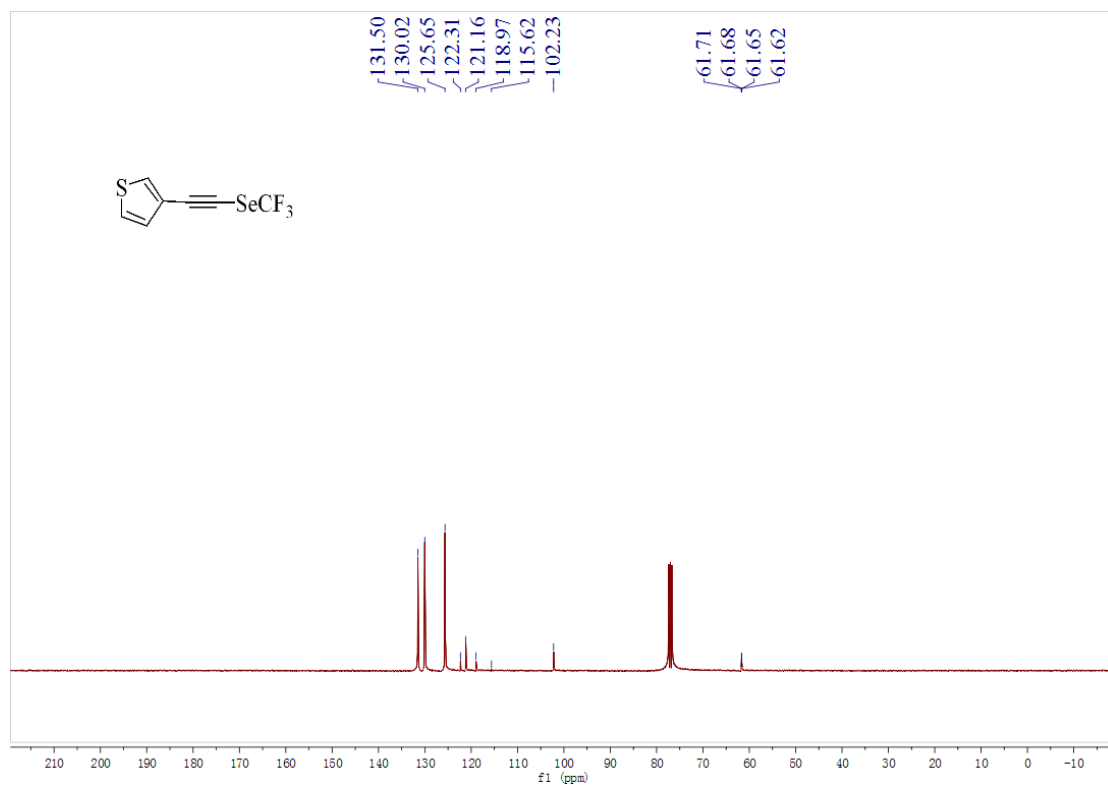



$^{19}\text{F}$  NMR spectrum of **3u** in  $\text{CDCl}_3$

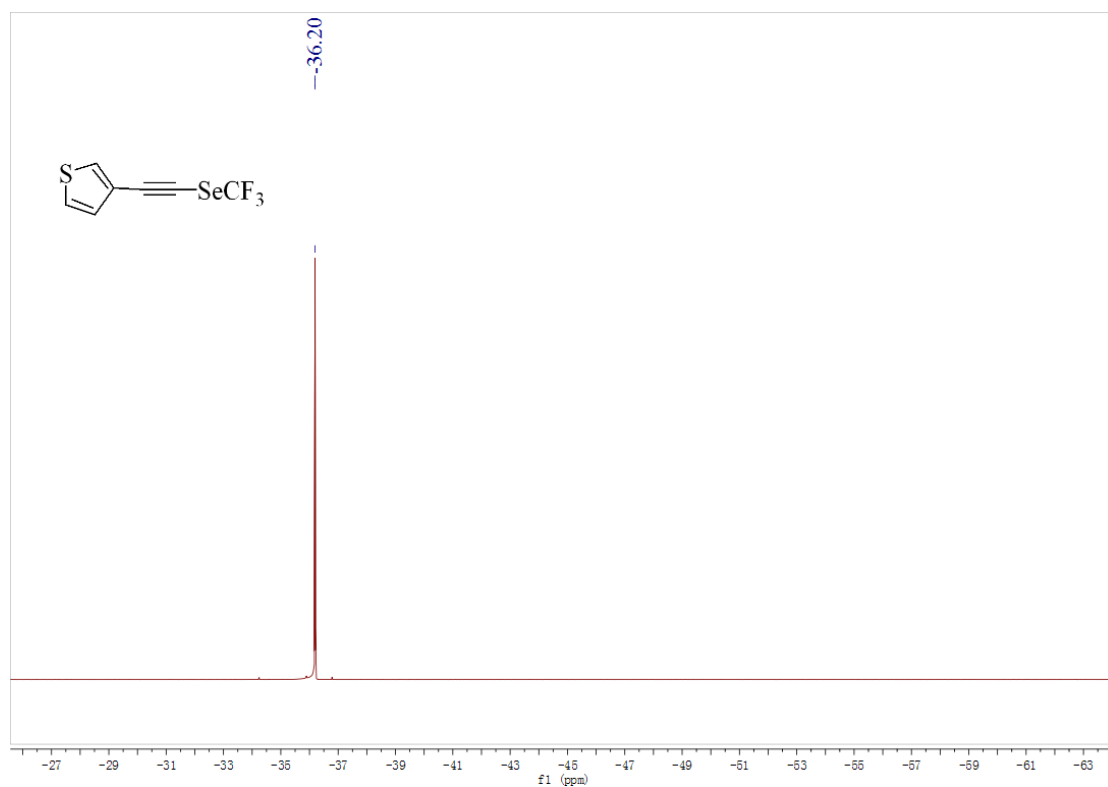

$^1\text{H}$  NMR spectrum of **3v** in  $\text{CDCl}_3$

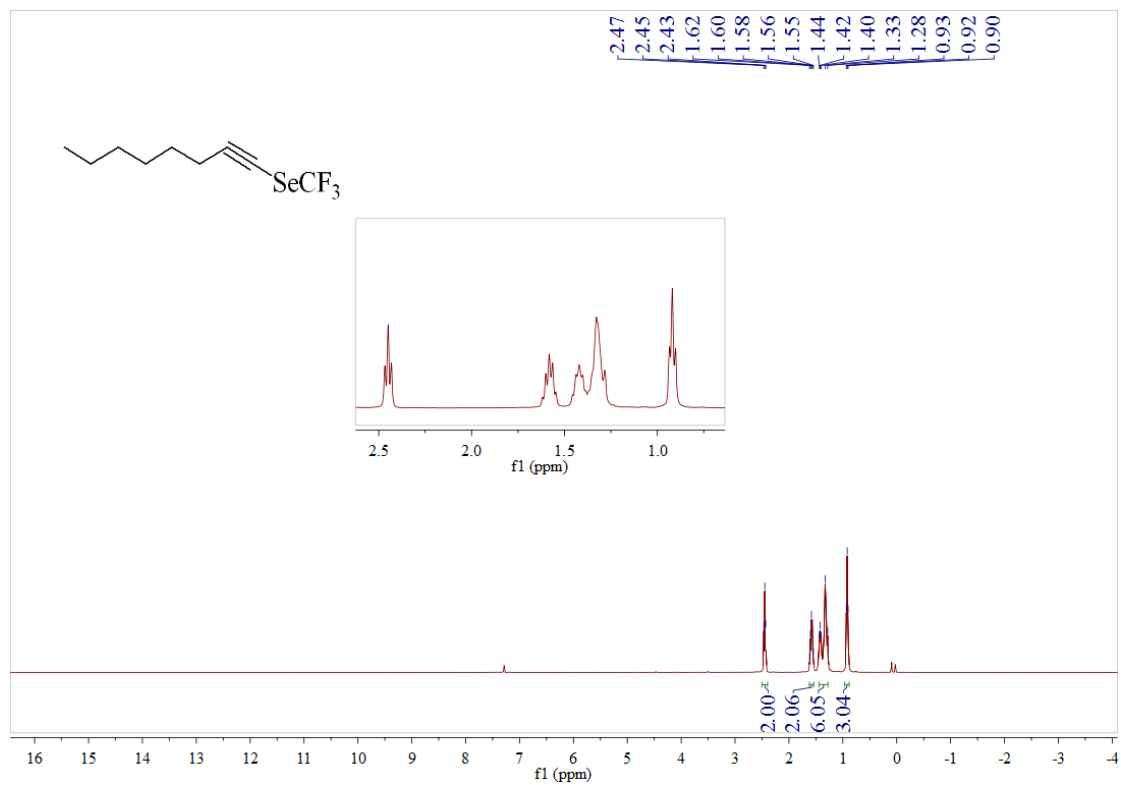

<sup>13</sup>C NMR spectrum of **3v** in CDCl<sub>3</sub>

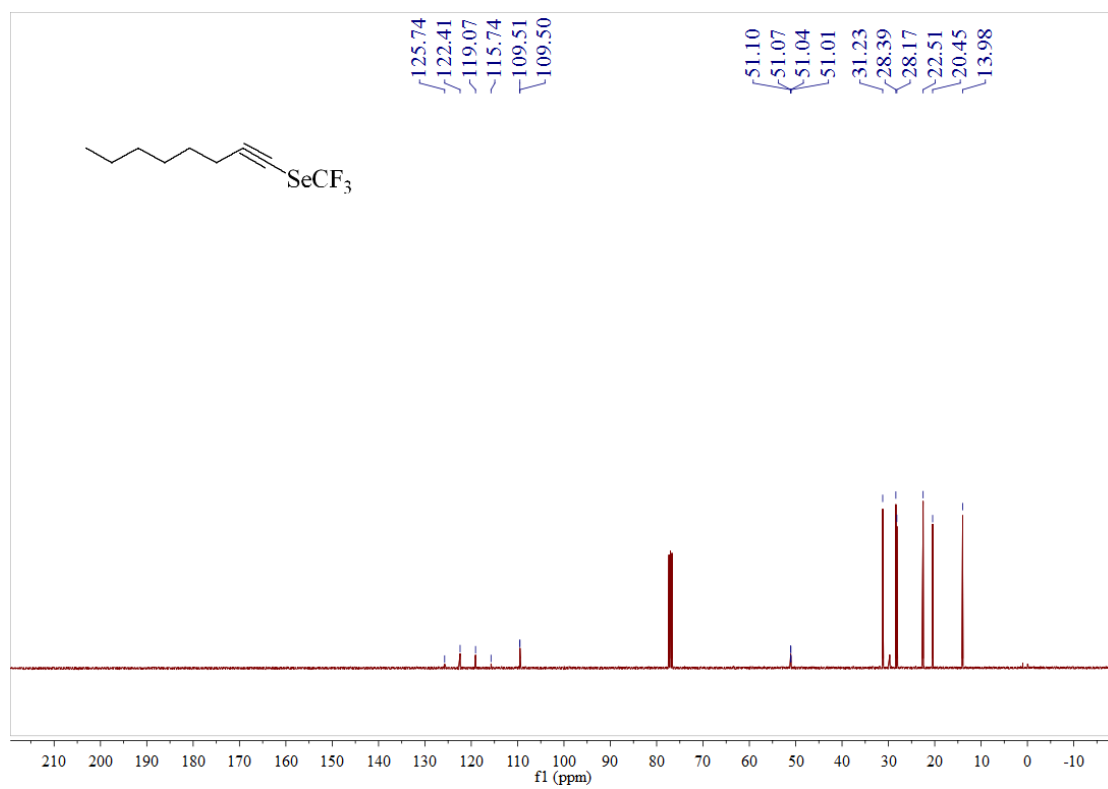

<sup>19</sup>F NMR spectrum of **3v** in CDCl<sub>3</sub>

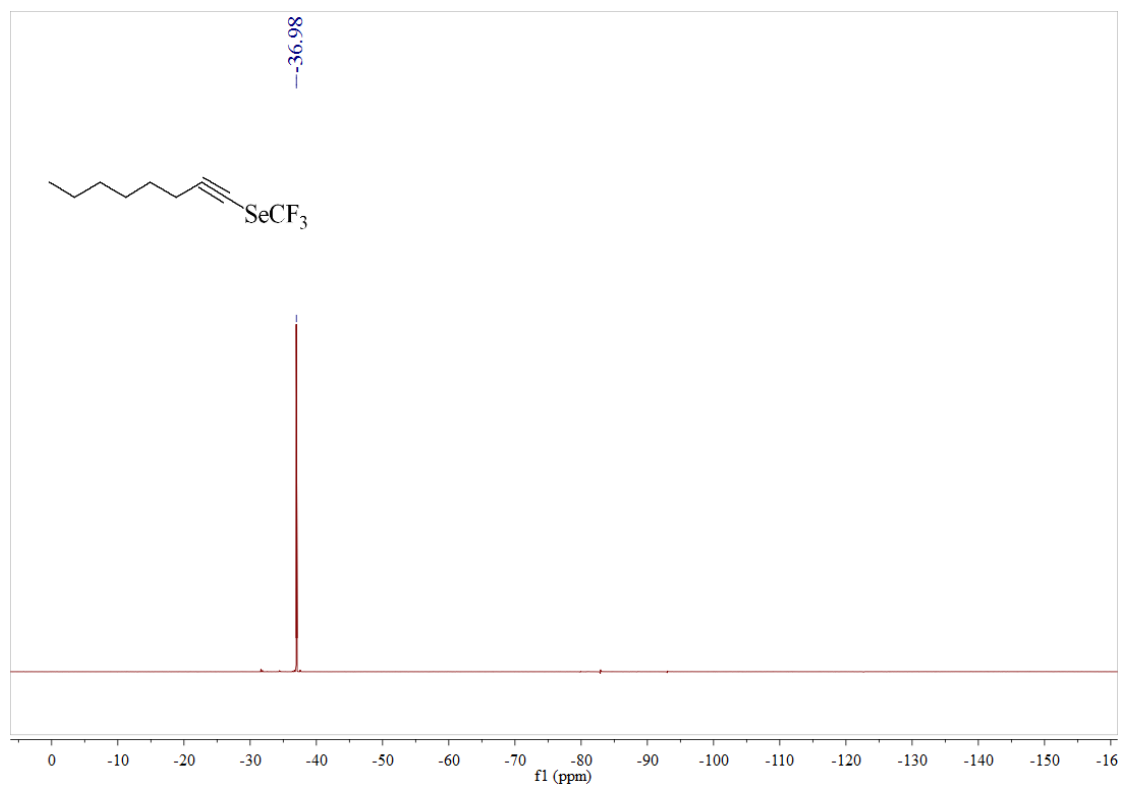

Supplement: c5qo00045a1.pdf [file c5qo00045a1.pdf]
